# Supplementary material for: Evaluating Large Language Models for Translating Caries Guidelines into Clinical Decision Support
Source: Research Square preprint supplement (doi:10.21203/rs.3.rs-8542862/v1), 2026-01-28
Supplement: Supplementary file 1 [file b1f94788e88cf66e232b6476.docx]

**Supplemental Information**

**STable 1 Guide for Non-medical Professionals**

| **Prompt** | **ChatGPT4o (OpenAI, US)** | **Groks(Google, US)** | **DeepSeek**  **(Hangzhou Dee7pSeek Artificial Intelligence, China)** |
| --- | --- | --- | --- |
| **As a professional endodontist and multidisciplinary specialist, I have been invited to review the following guidelines. My task is to summarize the sections on diseases such as dental caries, pulpitis, and periapical periodontitis in a clear, concise, and step-by-step manner suitable for non-medical readers. The summary will cover the following five aspects: etiology, clinical manifestations, diagnosis (including diagnostic basis and differential diagnosis), treatment, and prognosis and follow-up.** | **Caries (Tooth Decay) – Simplified Summary for NonMedical Audiences****Etiology (What causes it?)** Caries is caused by acid produced when bacteria in the mouth break down sugars from food. This acid weakens the teeth by removing minerals, leading to holes (called cavities). Risk factors include frequent sugar intake, poor brushing, dry mouth, and lack of fluoride.**2. Clinical Presentation (What does it look or feel like?)** Early signs: white or brown spots on the tooth. As it worsens: visible holes, sensitivity to sweets or temperature, toothache. It can affect the outer surface or go deeper toward the nerve. **3. Diagnosis (How is it identified?)** Dentists look visually and feel the surface of teeth. Xrays are used to see hidden or deeper decay. They check if the surface is still hard (early stage) or soft and broken (advanced). Differential diagnosis means making sure it’s not something else like stains, wear, or developmental defects.**4. Treatment (What can be done?)** Treatment depends on whether the decay is early (noncavitated) or advanced (cavitated): **Earlystage (noncavitated):** Can be reversed without drilling. Fluoride varnishes, gels, or special toothpaste can help. Sealants (thin protective coatings) can block further decay. Some treatments (like resin infiltration) fill in the early damaged area without removing tooth. **Advanced decay (cavitated):** Drilling might be avoided using **silver diamine fluoride (SDF)**, especially for young or anxious patients. SDF stops the decay but turns the area black. If needed, traditional fillings or other dental work may be required. **5. Prognosis and FollowUp (What happens next?)** With the right treatment and good care, early decay can be stopped or even reversed. Cavitated lesions can be arrested (stopped from getting worse), especially with regular use of SDF or fluoride. Followup visits are important to check that the decay has stopped. Dentists look for:  Harder tooth surface (means healing)  No further damage on xrays  Continued brushing, reduced sugar intake, and regular dental care are essential to prevent new decay.  Would you like this summary turned into a printable patient handout or visual infographic?  ASE Guidelines for Non-Surgical Root Canal Treatment (2024) emphasize the following standards:  Preoperative assessment must include medical history, clinical examination, and radiographic evaluation of pulp and periapical status, combined with an assessment of restorative and periodontal conditions to determine prognosis.  During treatment, local anesthesia should be administered, and rubber dam isolation must be used throughout the procedure. Access cavity preparation should preserve tooth structure while ensuring direct visual access, and magnification and ultrasonic devices should be utilized to avoid missed canals and perforations.  Root canal preparation requires establishing a reproducible glide path. Working length should be accurately determined using electronic apex locators and radiographic methods. Cleaning and shaping should be performed thoroughly while maintaining the original root canal anatomy.  Irrigation should primarily use sodium hypochlorite, supplemented if necessary with EDTA or chlorhexidine. Activation techniques such as sonic, ultrasonic, or negative pressure irrigation are recommended to enhance efficacy, with care taken to prevent irrigant extrusion.  In multiple-visit cases or infected canals, calcium hydroxide may be used as an intracanal medicament; routine antibiotic use is not recommended.  Obturation aims to achieve a tight three-dimensional seal, using gutta-percha in combination with resin-based or bioceramic sealers. Techniques may include lateral compaction, warm vertical compaction, or single-cone methods, while avoiding overfilling.  Immediate coronal sealing is mandatory after treatment. If definitive restoration is delayed, composite resin or temporary sealing materials should be applied. Final restoration should be based on remaining tooth structure, recommending overlays for posterior teeth and adhesive composite resin for anterior teeth.  Patients should be informed about possible short-term postoperative pain, and NSAIDs are recommended for management. Regular clinical and radiographic follow-up (starting at 6–12 months) is essential, with success defined by absence of symptoms and radiographic evidence of healing.  Quality and safety measures must be strictly followed, including mandatory rubber dam isolation, accurate working length determination, thorough irrigation and disinfection, and timely and adequate coronal restoration. | Summary of Dental Caries for a NonMedical Audience  Introduction  Dental caries, or tooth decay, is a common condition that affects people of all ages. It happens when bacteria in your mouth turn sugars and carbs from food into acid. This acid eats away at the hard outer layer of your teeth (enamel), which can lead to cavities if not addressed. Preventing and treating tooth decay is important to keep your teeth healthy and avoid pain or tooth loss.  1. Etiology (What Causes Tooth Decay?)  Tooth decay develops because of a mix of factors:  Bacteria: Harmful bacteria live in plaque (a sticky film on your teeth) and make acid when they break down sugars from food or drinks.  Diet: Eating a lot of sugary or starchy foods and drinks gives bacteria more fuel to produce acid.  Oral Hygiene: Not brushing or flossing regularly lets plaque build up, increasing acid damage.  Other Risks: Some medical conditions or medications (like those reducing saliva) can make decay more likely.  When these factors team up, the acid wears down your enamel over time.  2. Clinical Presentation (What Does Tooth Decay Look Like?)  Tooth decay shows up differently depending on how far it’s progressed:  Early Stage: You might see white spots on your teeth where the enamel is starting to weaken.  Later Stages: Cavities (holes) form, and you could feel tooth pain, sensitivity to hot or cold, or even lose a tooth if it gets bad enough.  It can happen to both baby teeth and adult teeth.  3. Diagnosis (How Do Dentists Find Tooth Decay?)  Dentists use a few methods to spot tooth decay:  Looking at Your Teeth: They check for white spots, cavities, or other signs of damage.  Xrays: These show decay hidden between teeth or under fillings.  Tools: Sometimes they use probes or lasers to see how bad the damage is.  Diagnostic Basis: Dentists look for weakened enamel (demineralization) and use Xrays to find deeper decay.  Differential Diagnosis: They make sure it’s tooth decay and not something else, like enamel defects (from birth) or fluorosis (from too much fluoride), which can look similar.  4. Treatment (How Is Tooth Decay Treated?)  The treatment depends on where the decay is and how serious it is. These are nondrilling options to stop or reverse it:  Early Decay (No Cavities Yet):  Chewing Surfaces: Dentists may apply sealants (a protective coating) with or without fluoride varnish (a fluoride paint).  Between Teeth: They might use fluoride varnish, resin infiltration (a special sealant), or sealants.  Front or Back Surfaces: Fluoride gel or varnish can help.  Advanced Decay (With Cavities):  Top of the Tooth: Silver diamine fluoride (a liquid that stops decay) is used.  Root Surfaces: Highstrength fluoride toothpaste or gel (5,000 ppm) is recommended.  These treatments aim to protect your teeth without needing fillings or more invasive work.  5. Prognosis (What’s the Outlook?)  The outcome depends on when and how it’s treated:  Caught Early: Treatments can stop or even reverse the decay, saving your tooth.  More Advanced: If it’s worse, you might need fillings or other fixes later.  Not Treated: It can lead to pain, infections, or losing the tooth.  Acting early gives the best chance for healthy teeth.  6. FollowUp (What Happens Next?)  Keeping up with dental care is key:  Regular Checkups: Dentists will check if the decay is stopping or getting worse.  More Visits if Needed: If you’re at high risk, they might want to see you more often.  Home Care: Brushing, flossing, and cutting back on sugar help the treatment work.  Staying on top of visits ensures your teeth stay in good shape.  Key Takeaway  Tooth decay is something you can prevent and treat, especially if caught early. Brushing twice a day, eating less sugar, and seeing your dentist regularly are simple steps to keep your smile healthy!  Based on guidelines developed by the Australian Society of Endodontology and published in the Australian Endodontic Journal, effective non-surgical root canal treatment requires adherence to a series of evidence-based steps, beginning with a proper diagnosis and case assessment to determine case complexity and the potential need for specialist referral. This is followed by access cavity preparation that minimizes tooth damage while ensuring complete access to the canal system, and then meticulous root canal preparation to clean and shape the canals for disinfection. The use of effective irrigation solutions and medicaments is critical to eliminate bacteria, and the root canal system must be completely sealed with appropriate obturation techniques to prevent reinfection. Subsequently, the timely and appropriate restoration of the treated tooth is essential to restore function and aesthetics, and finally, regular recall visits are necessary to assess the treatment's long-term outcome and address any complications. The guidelines emphasize that dentists must continuously update their skills, understand their limitations for referral purposes, and tailor each treatment to the patient's specific needs, as these best practices ultimately aim to standardize high-quality care and improve patient outcomes across Australia. | Concise Guide to Preventive Treatment for Dental Caries (For Non-Medical Readers)  I. Etiology: Why Do Cavities Occur?  Core Cause: Frequent consumption of sugary foods or drinks. Bacteria in the mouth metabolize sugar to produce acid, which disrupts the mineral balance of the tooth surface.  Key Factors:  - Risk Factors: High-sugar diet, poor oral hygiene, reduced saliva flow.  - Protective Factors: Fluoride (e.g., fluoride toothpaste), calcium and phosphate (promote tooth remineralization), good oral cleaning habits.  II. Clinical Manifestations: What Do Cavities Look Like?  Early-Stage Caries (Non-Cavitated):  - White or brown spots on the tooth surface without obvious holes.  - Commonly found in pits and fissures on chewing surfaces, between teeth, or on buccal/lingual surfaces.  Advanced Caries (Cavitated):  - Visible holes on the tooth surface, possibly accompanied by sensitivity or pain.  - Root caries (exposed roots) are common in middle-aged and older adults.  III. Diagnosis: How Are Cavities Detected?  Examination Methods:  1. Visual inspection: Dentists use a probe to check for roughness or discoloration on the tooth surface.  2. X-rays: Detect hidden decay between teeth or roots.  3. International Caries Detection and Assessment System (ICDAS): Classifies caries depth into levels 0–6 to guide treatment planning.  Differential Diagnosis:  - Must be distinguished from tooth wear or acid erosion (e.g., caused by gastric acid reflux).  IV. Treatment: How to Stop Cavities from Progressing?  Non-Restorative Treatment (No Drilling Required):  - Fluoride Application:  - 5% sodium fluoride varnish: Applied every 3–6 months to promote remineralization.  - 1.23% acidulated phosphate fluoride gel: Suitable for high-risk patients, requires professional application.  - Pit and Fissure Sealants:  - Cover grooves on chewing surfaces to prevent food debris accumulation, especially in children.  - Silver Diamine Fluoride (SDF):  - Used to rapidly arrest caries (especially in children’s primary teeth), but may darken the tooth (requires patient consent).  - High-Fluoride Toothpaste (5000 ppm): Daily use, suitable for patients with root caries.  Applicable Scenarios:  - Primary tooth caries: Prioritize SDF or sealants + fluoride.  - Early permanent tooth caries: Sealants or resin infiltration technology.  - Root caries: High-fluoride toothpaste or SDF.  V. Prognosis and Follow-up: What to Expect After Treatment?  Prognosis:  - Early intervention can reverse decay. Cavitated caries require regular monitoring to ensure progression halts.  - Treatment success depends on patient compliance (e.g., reducing sugar intake, consistent use of fluoride toothpaste).  Follow-up Recommendations:  1. Review every 3–6 months: Check if caries have hardened or darkened (signs of arrest).  2. X-ray tracking: Assess stability of deep caries.  3. Personalized adjustments: If treatment is ineffective, switch to restorative treatment (e.g., fillings).  Root canal treatment, commonly known as "nerve removal," is a procedure used to treat infections or necrosis of the dental pulp (tooth nerve). Its aim is to eliminate infection, relieve pain, and preserve the natural tooth. Key steps of the treatment include: diagnosis and assessment, during which the dentist identifies the dental issue and evaluates the complexity of the case through consultation and imaging (such as X-rays or CBCT)—referral to a specialist may be recommended for complex cases; access cavity preparation, where a small opening is made in the tooth to reach the pulp chamber while preserving healthy tooth structure as much as possible; cleaning and disinfection, where fine instruments and disinfecting irrigants (e.g., sodium hypochlorite) are used to thoroughly remove bacteria and necrotic tissue from the root canal system; root canal filling, in which a material called gutta-percha along with a sealer is used to fill the canal to prevent reinfection; tooth restoration, where a timely permanent restoration (such as a crown or filling) is placed after treatment to prevent tooth fracture or recurrent decay; and follow-up visits, which involve periodic check-ups to ensure the tooth has healed properly without signs of reinfection. Important considerations include: the use of rubber dam isolation during the procedure to maintain a clean and dry operating field; the dentist’s responsibility to assess case difficulty and their own competency, referring when necessary; and ensuring patients understand the treatment process, potential risks, and the need for restoration. The ultimate goal is to preserve the natural tooth, restore chewing function, and maintain long-term oral health through standardized, evidence-based procedures. |

**STable 2 Guide for Junior Doctors and Medical Students**

| **Prompt** | **ChatGPT4o** | **Groks** | **DeepSeek** |
| --- | --- | --- | --- |
| **As a professional endodontist and multidisciplinary specialist, I have been invited to review the following guidelines. My task is to summarize the section on dental caries in a clear, concise, and step-by-step manner suitable for junior doctors and medical students. The summary will cover the following five aspects: etiology, clinical manifestations, diagnosis (including diagnostic basis and differential diagnosis), treatment, and prognosis and follow-up.** | Concise, step-by-step summary — ****Dental caries**** (for junior doctors / medical students; based on the ADA evidence-based guideline on nonrestorative treatments) 1) Etiology — core facts (one line) Caries is the net result of frequent acid production by oral biofilm bacteria metabolizing dietary carbohydrates → shift of the demineralization–remineralization balance toward mineral loss; host protective factors (fluoride, saliva, Ca/P) modify risk and outcome. 2) Clinical manifestations — simple classification **Non-cavitated (incipient / ICDAS 1–2)** — enamel surface macroscopically intact (white-spot or brown); may be active or arrested.  **Cavitated (ICDAS 5–6)** — visible surface discontinuity with loss of tooth structure; less likely to reverse without intervention.  **Root caries** — usually in older adults, at cervical/root surfaces; can be noncavitated or cavitated.  Key clinical point: **hardness on gentle probing = sign of arrest**; lesion colour (eg, black after SDF) is **not** a reliable indicator of arrest. 3) Diagnosis — stepwise approach (how to decide lesion type & activity) **Risk assessment (patient level):** diet (sugar frequency), saliva, fluoride exposure, past caries, socio-economic/behavioral factors.  **Visual–tactile exam:** record ICDAS score; do gentle probing only (avoid aggressive excavation). Use drying to reveal white-spot lesions.  **Radiographs:** essential for approximal lesions — use radiographic depth to help determine noncavitated vs cavitated (radiolucency to outer 1/3 dentin often still managed nonrestoratively if limited).  **Activity assessment:** test texture/hardness (gentle probe) and clinical progression over time (soft → active). Colour is not an acceptable sole marker of arrest.  **Differential diagnosis (remember):** developmental enamel defects, staining, erosion/abrasion/abfraction, fractured enamel, marginal breakdown of restorations — integrate history and radiographs. (Standard clinical reasoning; guideline emphasizes combining visual + radiographic methods.)  **Decision node:** classify lesion as noncavitated (ICDAS 1–2) or cavitated (ICDAS 5–6) and note surface (occlusal/approximal/facial-lingual/root) — this drives the treatment choice. 4) Treatment — lesion-level + patient-level, stepwise and practical **A. Start with patient-level measures (always):** sugar-reduction counselling, oral hygiene reinforcement, fluoridated toothpaste. These re-establish mineral balance and support lesion-level therapy.  **B. Lesion-level (nonrestorative) priorities by lesion type & surface — concise cheatsheet**  **Advanced cavitated coronal lesions (primary teeth):** **38% SDF**, biannual application is **preferred** over 5% NaF varnish (strong recommendation). Use SDF especially when minimal invasiveness or patient cooperation is a concern.  **Permanent teeth (advanced cavitated coronal):** 38% SDF biannual is suggested (conditional, lower-certainty evidence). Inform about black staining and obtain consent.  **Noncavitated occlusal lesions (primary & permanent):** **Sealants + 5% NaF varnish (apply every 3–6 months)**, or **sealants alone**, are top priority (moderate-certainty, strong recommendation). Choose glass-ionomer sealant if dry field cannot be maintained.  **Noncavitated approximal lesions:** options (in priority order) **resin infiltration ± 5% NaF varnish**, **5% NaF varnish** (q3–6 months), or **sealants** (conditional evidence). Use radiographs to stage and guide choice. Resin infiltration is technique sensitive.  **Noncavitated facial/lingual lesions:** **1.23% APF gel** or **5% NaF varnish** (application every 3–6 months) are suggested.  **Root surfaces (noncavitated & cavitated, permanent teeth):** **5,000 ppm fluoride (1.1% NaF) toothpaste or gel daily** (at-home) is prioritized over in-office varnish or annual SDF; this requires adherence. If adherence is limited, consider varnish or SDF alternatives.  **C. Important practical notes**  **SDF staining:** effective but causes black staining of arrested carious dentin — discuss and document informed consent. Do not judge lesion arrest by color alone.  **Sealant technique:** enamel removal is unnecessary before sealant placement; retention depends on isolation and material (resin vs glass ionomer).  **Frequency reminders:** varnishes/APF → typically every **3–6 months**; SDF → **biannual** for recommended use; 0.2% NaF mouthrinse → **once weekly** in some protocols (not for children who swallow).  **D. When to escalate to restorative or surgical care** If after appropriate nonrestorative therapy and reasonable monitoring there are **no signs of arrest** (softness, radiographic progression, symptoms) — escalate to minimally-invasive restorative or conventional operative treatment per standard restorative guidelines. The guideline stresses active monitoring and switching if needed. 5) Prognosis & follow-up — practical plan **Monitoring targets:** hardness/texture on gentle probing, absence of progressive symptoms, and radiographic stability or improvement. Colour change (eg, SDF blackening) ≠ proof of arrest.  **Follow-up interval:** align with intervention — typically **every 3–6 months** for varnish/APF/ sealant review; root lesion outcomes are often checked within **3–12 months** depending on risk and intervention. Adjust frequency according to risk and lesion activity.  **Outcome definitions:**  Arrested lesion = surface clinically harder and stable, no radiographic progression;  Reversed lesion = radiographic/clinical signs of remineralization or disappearance of white-spot features with restored surface integrity.  **Documentation & patient discussions:** record baseline photos/radiographs, treatment chosen, informed consent (esp. for SDF), and the monitoring plan. One-page cheat (ultra-short) Classify lesion: **noncavitated vs cavitated** (ICDAS + radiograph).  Always do **patient-level** measures (diet, fluoride toothpaste).  Apply **surface-specific nonrestorative** therapy per guideline (e.g., sealant + 5% NaF for occlusal; resin infiltration/NaF for approximal; 38% SDF biannual for advanced cavitated primary).  **Monitor** (hardness, radiographs) q3–6 months; escalate if progression.  If you want, I can convert this into a one-page printable handout or a 1-slide summary for a teaching session (I can format it as a ready-to-print PDF or PowerPoint slide). Which format would you prefer?  Thank you for providing the complete text of the ASE Guidelines for Non-Surgical Root Canal Treatment (Australian Endodontic Journal, 2024).  This is a comprehensive, evidence-based framework outlining standards of practice for endodontic treatment in Australia, structured around key stages of care:  1. Diagnosis & Case Difficulty Assessment  - Proper history-taking, examination, imaging (periapical radiographs, CBCT if indicated), and vitality testing.  - Clear documentation using standardized endodontic diagnostic terminology.  - Clinicians must self-assess competence and refer complex cases.  2. Access Cavity Preparation  - Aim for conservative access with complete visibility of canal orifices.  - Mandatory use of rubber dam isolation.  - Avoid overextension, perforations, or excessive dentine removal.  3. Root Canal Preparation  - Establish accurate working length (using electronic apex locator and radiographs).  - Shape canals to allow effective irrigant penetration (recommended apical size ~25/0.06 or larger as appropriate).  - Avoid ledges, transportation, or over-enlargement.  4. Irrigation & Medicaments  - Sodium hypochlorite (up to 6%) is essential for disinfection and tissue dissolution.  - EDTA (17%) for smear layer removal.  - Chlorhexidine (CHX) has limited indications and is not a substitute for NaOCl.  - Calcium hydroxide is recommended for interappointment disinfection.  - Avoid irrigant extrusion and harmful chemical interactions (e.g., NaOCl + CHX).  5. Root Canal Obturation  - Fill to working length, ideally within 0–1 mm of the radiographic apex.  - No technique is universally superior; lateral condensation, vertical compaction, or single-cone techniques are acceptable if performed properly.  - Use gutta-percha with sealer (increasing acceptance of calcium silicate-based sealers).  - Prevent overfilling, voids, and disregard for canal anatomy.  6. Restoration of Root Canal-Treated Teeth  - Place definitive restoration promptly (direct restoration, onlay, or crown based on case requirements).  - Preserve tooth structure (onlays preferred over full crowns when possible).  - Protect against fracture and reinfection.  - Avoid long-term temporary restorations.  7. Recall & Outcome Assessment  - Regular clinical and radiographic follow-up (6–12 months).  - Assess healing, function, and restoration integrity.  - Modify practice based on outcomes (self-audit).  - Engage patients in shared decision-making if retreatment or extraction is needed.  Key Themes Across the Guidelines  - Evidence-based, competency-driven care: Dentists must recognize limitations and refer when necessary.  - Conservatism and preservation: Protect dentine and minimize risks.  - Disinfection priority: Irrigation and aseptic techniques are central.  - Patient-centred care: Shared decision-making, informed consent, and outcome monitoring.  - Lifelong learning: Clinicians are expected to self-assess, update skills, and adapt to evolving standards.  Would you like me to create a condensed clinical flowchart/checklist (from diagnosis → access → shaping → irrigation → obturation → restoration → recall) for chairside use? This would provide a one-page structured reference for clinical practice. | Summary of Dental Caries for Junior Doctors and Medical Students  1. Etiology (Causes of Dental Caries)  Dental caries, or tooth decay, is a chronic, multifactorial disease driven by:  - Bacterial Factors: Cariogenic bacteria (e.g., Streptococcus mutans) in dental plaque metabolize fermentable carbohydrates (sugars, starches), producing acids that demineralize enamel by lowering pH.  - Dietary Factors: Frequent intake of sugary or starchy foods fuels acid production.  - Host Factors: Poor oral hygiene, low salivary flow (e.g., from medications or conditions), and genetic enamel defects increase risk.  - Environmental Factors: Limited fluoride exposure, socioeconomic challenges, or lack of dental care access worsen progression.  2. Clinical Manifestations  Caries presents in two main stages:  - Noncavitated Lesions: Early decay appears as white-spot lesions (demineralized enamel) without surface breakdown. These are reversible with intervention. May look white or brown.  - Cavitated Lesions: Advanced decay with visible holes or cavitation in enamel, often causing pain, sensitivity, or infection. Less likely to reverse naturally.  - Locations: Occurs on occlusal (chewing), approximal (between teeth), facial, lingual, or root surfaces.  3. Diagnosis  Diagnostic Basis  - Visual Examination: Check for white spots, discoloration, or cavities.  - Tactile Examination: Use a probe gently—softness suggests active decay; hardness indicates arrest.  - Radiographic Assessment: Bitewing X-rays reveal interproximal or hidden caries.  - ICDAS Scoring: Standardizes severity (e.g., ICDAS 1-2 = noncavitated; 5-6 = cavitated).  Differential Diagnosis  - Developmental Defects: Enamel hypoplasia or fluorosis (non-progressive, unlike caries).  - Erosion: Acid-related (diet, reflux), not bacterial.  - Abrasion: Mechanical wear (e.g., brushing), not decay-related.  4. Treatment (Nonrestorative Approaches)  Focuses on arresting or reversing caries without drilling:  - Noncavitated Lesions:  - Occlusal Surfaces: Sealants + 5% sodium fluoride (NaF) varnish (every 3-6 months) or sealants alone.  - Approximal Surfaces: 5% NaF varnish, resin infiltration, or sealants.  - Facial/Lingual Surfaces: 1.23% acidulated phosphate fluoride (APF) gel or 5% NaF varnish.  - Root Surfaces: 5,000 ppm fluoride toothpaste/gel (daily use).  - Cavitated Lesions:  - Coronal Surfaces: 38% silver diamine fluoride (SDF) solution (biannual application; stains black).  - Root Surfaces: 5,000 ppm fluoride toothpaste/gel.  - Notes: Fluoride remineralizes enamel; SDF arrests decay but causes staining. Avoid 10% casein phosphopeptide-amorphous calcium phosphate (CPP-ACP) if fluoride options are available.  5. Prognosis and Follow-Up  Prognosis  - Noncavitated Lesions: Early treatment can arrest or reverse decay, preserving tooth structure.  - Cavitated Lesions: May stabilize with nonrestorative methods, but unrestored cases risk pain, infection, or tooth loss.  - Untreated Caries: Progresses to complications (e.g., abscesses).  Follow-Up  - Monitor every 3-6 months using visual, tactile, and radiographic checks.  - Assess lesion hardness (arrested) or progression (active).  - Adjust treatment if needed and educate patients on diet (low sugar), oral hygiene (brushing with fluoride toothpaste), and fluoride use.  Key Takeaway  Dental caries is a preventable, manageable disease. Early detection and evidence-based nonrestorative treatments—like fluoride and sealants—can halt or reverse progression, especially in noncavitated stages. Regular monitoring and patient education are vital for success.  Accurate diagnosis requires a combination of clinical and radiographic evaluation, and clinicians must assess their own ability to manage specific cases and refer complex cases in a timely manner when necessary; the ideal access cavity should provide complete access to the root canal system while minimizing the removal of tooth structure, thereby ensuring optimal restorative outcomes; root canal preparation should achieve a tapered shape to facilitate disinfection and obturation, while avoiding errors such as ledges and perforations; for irrigation and medication, sodium hypochlorite (NaOCl) is primarily recommended for disinfection, and intracanal medicaments may be considered in multiple-visit treatments; root canal obturation should completely seal the root canal system to prevent microbial reinfection, with specific techniques chosen based on clinical circumstances; after treatment, timely definitive restoration is essential to prevent tooth fracture or recurrent caries, and the restorative plan should comprehensively consider the remaining tooth structure and patient needs; regular follow-up evaluations via clinical and radiographic assessment are crucial to monitor treatment efficacy and adjust ongoing care, with shared decision-making involving the patient emphasized. The guidelines stress that clinicians should pursue continuous education and evaluate their practice against these guidelines, while maintaining professional competency, keeping abreast of technological advances, and referring cases when necessary to uphold high standards of care. The ASE disclaims any liability for clinical decisions made based on these guidelines and recommends that clinicians exercise professional judgment tailored to individual patient circumstances. These guidelines represent an effort to standardize root canal treatment practices in Australia and improve patient outcomes, with future updates planned to ensure continued relevance in the evolving field of endodontics. | Summary of Clinical Guidelines for Preventive Treatment of Dental Caries  I. Etiology  1. Core Mechanism: Frequent carbohydrate intake leads to acid production by oral microorganisms through metabolism, disrupting the demineralization-remineralization balance and causing demineralization of dental hard tissues.  2. Risk Factors:  - Pathological factors: Cariogenic bacteria (e.g., Streptococcus mutans), high-sugar diet, reduced saliva secretion.  - Protective factors: Fluoride, calcium and phosphate ions, salivary buffering capacity.    II. Clinical Manifestations  1. Non-Cavitated Lesions (ICDAS Levels 1–2):  - Intact surface with white or brown spots (early caries), no visible cavity.  - May be reversible or arrested.  2. Cavitated Lesions (ICDAS Levels 5–6):  - Surface breakdown (cavity) with softness or roughness upon probing.  - Common sites: Occlusal surfaces, proximal surfaces, buccal/lingual surfaces, root surfaces.  III. Diagnosis and Differential Diagnosis  1. Diagnostic Basis:  - Clinical examination: Visual inspection (color, texture), probe hardness test.  - Imaging: X-ray assessment of depth in proximal and root caries (enamel or outer dentin).  - Classification criteria: ICDAS system (non-cavitated/cavitated, active/arrested).  2. Differential Diagnosis:  - Non-carious tooth defects such as enamel hypoplasia, dental fluorosis, and acid erosion.  IV. Non-Restorative Treatment Recommendations  Core Principle: Select interventions based on lesion type (non-cavitated/cavitated), tooth type (primary/permanent), and surface location.  1. Non-Cavitated Lesions (Reversible or Arrested):  - Occlusal surfaces: Pit and fissure sealants (resin or glass ionomer) + 5% sodium fluoride varnish (every 3–6 months).  - Proximal surfaces: 5% sodium fluoride varnish, resin infiltration, or sealants (requires temporary tooth separation).  - Buccal/lingual surfaces: 1.23% acidulated phosphate fluoride gel or 5% sodium fluoride varnish (every 3–6 months).  - Root surfaces: 5000 ppm (1.1%) sodium fluoride toothpaste/gel (at least once daily).  2. Cavitated Lesions (Require Progression Arrest):  - Primary tooth crowns: 38% silver diamine fluoride (SDF) every 6 months, superior to 5% sodium fluoride varnish (Evidence level: Moderate, Strong recommendation).  - Permanent tooth crowns: 38% SDF (Conditional recommendation, Evidence level: Low).  - Root caries (permanent teeth): Prioritize 5000 ppm fluoride toothpaste; alternatives include SDF or chlorhexidine + thymol varnish.  3. Not Recommended: 10% casein phosphopeptide-amorphous calcium phosphate (CPP-ACP) as a substitute for fluoride.  V. Prognosis and Follow-up  1. Prognostic Factors:  - Early intervention can reverse non-cavitated lesions; cavitated lesions require continuous monitoring.  - Patient compliance (e.g., dietary control, oral hygiene) is critical.  2. Follow-up Key Points:  - Assessment indicators: Lesion hardness, color (black indicates inactivity), radiographic stability.  - Frequency: Review every 3–6 months; adjust treatment plan if no signs of arrest.  3. Precautions:  - SDF may cause tooth darkening; informed consent is required.  - High-concentration fluoride (e.g., 5000 ppm toothpaste) requires caution against accidental ingestion (use with care in children).  Summary: Caries management requires a combination of etiology-based prevention, precise diagnosis, and stratified treatment. Non-restorative methods (e.g., fluoride, sealants) effectively control early lesions, while regular monitoring and patient education are key to long-term success.  Okay, here is a summary of the core content from the Australian Society of Endodontology (ASE)  Guidelines for Non-Surgical Root Canal Treatment, compiled for junior doctors and medical students, presented in a single standard English paragraph:  This guideline aims to provide an evidence-based modern standard for clinical practice, emphasizing quality process and competence, with the core objective of preserving the natural dentition through the prevention and treatment of pulp and periapical diseases. Its foundational principles mandate that dentists must operate within their competence, performing standardized case difficulty assessment and referring complex cases (e.g., complex anatomy, retreatment, difficult diagnosis) to endodontic specialists as an ethical and responsible requirement, utilizing available assessment tools for decision support. It underscores the necessity of lifelong learning to keep pace with evolving techniques and materials (e.g., NiTi instruments, bioceramics, CBCT) and highlights the reliance on multidisciplinary care, particularly regarding pre-operative restorability assessment. The critical treatment流程 points are detailed as follows: Diagnosis requires a definitive pulp and periapical status diagnosis using modern terminology based on history, clinical examination, and radiographs, with limited-field CBCT being a crucial adjunct; initiating treatment without a clear diagnosis or assessing restorability and difficulty is strictly contraindicated. Access cavity preparation, performed under mandatory rubber dam isolation, must provide unobstructed access to all canal orifices while maximizing tooth structure conservation, utilizing anatomical landmarks and modern trends favoring a more minimally invasive approach over traditional designs. Root canal preparation aims to shape the system for effective disinfection and obturation, maintaining its confines; working length (WL) is determined 0.5-1.0mm from the apex using electronic apex locators corroborated by radiographs, with preparation to a sufficient size for effective irrigation while avoiding over-preparation; mechanical preparation significantly reduces microbes but is insufficient alone, requiring chemical disinfection. Irrigation and medicaments are the cornerstone of disinfection; the gold standard protocol involves NaOCl (sodium hypochlorite) as the primary irrigant throughout for its unique tissue-dissolving and antimicrobial properties, followed by a final flush with 17% EDTA for 1 minute to remove the smear layer, with critical cautions against forcing NaOCl periapically and avoiding mixing NaOCl with EDTA/CHX (chlorhexidine) to prevent precipitate formation; Ca(OH)2 (calcium hydroxide) is the common interappointment medicament. Obturation seeks 3D hermetic seal of the system with dense fill terminating within 0-1mm of WL, avoiding overfilling; techniques vary (lateral/vertical condensation, carrier-based), with the single-cone technique paired with bioceramic sealers gaining popularity, provided apical termination standards and thorough disinfection are met—obturation is contraindicated if disinfection is inadequate. Restoration must be performed promptly (ideally immediately or ASAP) with a design based on maximal tooth conservation, prioritizing cusp-overlapping restorations (e.g., onlays, full-coverage crowns) for posterior teeth over direct fillings; if a post is needed, it should be placed under rubber dam preserving adequate root filling. Finally, recall and outcome assessment are necessary via clinical and radiographic review (e.g., at 6-12 months) to evaluate success based on absence of symptoms, tooth survival, and normal periapical appearance, discussing retreatment or extraction if failure occurs. In summary, rubber dam isolation is an absolute mandatory requirement; this guideline represents a standard of practice framework, not a substitute for judgment, urging beginners to master the standardized流程, understand the principles, cultivate risk awareness, and heed the crucial "what not to do" cautions outlined. |

**STable 3 Evaluation of the Generated Guide Summary for Non-medical Professionals**

| **Tool** | **Prompt** |
| --- | --- |
|  | **Explain Dental pulp diseases such as caries and periapical periodontitis Treatment Steps for Laypersons**  Please evaluate the above information against the content of the document, specifying and scoring it from the perspectives of (accuracy, clarity, conciseness, logic, and overall assessment) |
|  | **Response** |
| **Deepseek evaluates Deepseek** | Evaluation of the Summary on Preventive Treatment of Dental Caries  1. Accuracy: 8.5/10  - Strengths:  - The etiology section accurately summarizes the core mechanism of carbohydrate metabolism leading to an acidic environment that disrupts the mineral balance.  - The treatment section correctly lists non-restorative methods such as fluoride, sealants, SDF, and high-fluoride toothpaste, aligning with the guideline recommendations.  - Areas for Improvement:  - Key details from the guideline are missing, such as the ICDAS classification criteria (non-cavitated caries: ICDAS 1–2; cavitated caries: ICDAS 5–6).  - Omission of resin infiltration for proximal caries and the side effect of SDF (tooth darkening), which requires informed consent.  2. Clarity: 8/10  - Strengths:  - The structure is clear, with sections on etiology, manifestations, diagnosis, etc., making it accessible to non-experts.  - Everyday language is used to explain professional terms (e.g., “sodium fluoride varnish”).  - Areas for Improvement:  - Some terms (e.g., “ICDAS,” “resin infiltration”) lack further explanation, which may hinder understanding.  - The distinction between primary and permanent teeth treatment priorities (e.g., SDF is more recommended for primary teeth) is not clearly emphasized.  3. Conciseness: 9/10  - Strengths:  - Information is reasonably condensed, avoiding lengthy descriptions (e.g., etiology only lists key factors).  - Treatment recommendations are scenario-based, making them concise and practical.  - Areas for Improvement:  - The prognosis section could merge repetitive content (e.g., “regular follow-up” and “personalized adjustments”).  4. Logicality: 9/10  - Strengths:  - The flow from etiology to follow-up is coherent and aligns with medical logic.  - The treatment section follows a progressive “non-restorative → restorative” approach, consistent with the guideline’s hierarchy.  - Areas for Improvement:  - The diagnosis section could include “hardness check” as a key criterion for determining caries arrest.  5. Overall Assessment: 8.5/10  - Summary:  The summary is comprehensive and easy to understand, suitable for non-medical audiences to quickly grasp key points of caries management. However, critical details (e.g., ICDAS classification, SDF side effects) need to be added to improve accuracy.  - Recommendations:  - Include a simplified explanation of ICDAS levels (e.g., “early white spots = Level 1, obvious cavities = Level 5”).  - Note SDF’s side effect (tooth darkening) and its preferred use in primary teeth in the treatment section. |
| **Deepseek evaluates Grok3** | Evaluation of the Dental Caries Summary (Out of 10 Points)  1. Accuracy: 9/10  - Description:  The summary broadly covers key information from the guideline, including the etiology of caries (bacteria, diet, oral hygiene), clinical stages (early white spots, advanced cavities), diagnostic methods (visual examination, X-rays, instrumental detection), and non-restorative treatment options (e.g., fluoride, sealants, resin infiltration).  - Points Deducted:  - Did not mention the specific application scenarios of silver diamine fluoride (SDF) for severe carious lesions (e.g., coronal or root caries in primary teeth or uncooperative patients) as highlighted in the guideline.  - The section on root caries treatment did not explicitly emphasize the recommended priority use of 5,000 ppm fluoride toothpaste or gel.  2. Clarity: 8.5/10  - Description:  The language is clear and accessible, avoiding excessive professional jargon (e.g., explaining "remineralization" as "repairing tooth enamel") and simplifying complex concepts (e.g., resin infiltration).  - Points Deducted:  - Some terms (e.g., "International Caries Detection and Assessment System (ICDAS)") were not explained, which may confuse non-medical readers.  - The classification of "non-restorative treatments" (e.g., sealants combined with fluoride) could be further elaborated.  3. Conciseness: 9/10  - Description:  The information is highly condensed and focused (e.g., highlighting the importance of early intervention and context-specific treatments), with no redundant content.  - Points Deducted:  - The prognosis section mentioned "untreated caries may lead to tooth loss" but could enhance its impact by including the economic burden emphasized in the guideline (global treatment costs reaching $298 billion).  4. Logicality: 9/10  - Description:  The structure is reasonable, with a coherent flow from etiology to follow-up, aligning with the natural logic of disease understanding and management.  - Points Deducted:  - The diagnosis section did not clearly distinguish between non-cavitated (ICDAS 1–2) and cavitated (ICDAS 5–6) lesions, which affects the logical connection to treatment choices.  5. Overall Assessment: 8.8/10  - Summary:  The summary excels in accuracy and accessibility, helping non-medical readers quickly grasp core knowledge about dental caries. However, key details (e.g., indications for SDF, priority use of high-concentration fluoride) need to be added to enhance comprehensiveness.  - Suggestions for Improvement:  - Include the target population for silver diamine fluoride (SDF) (e.g., children, patients at high anesthetic risk) and its side effects (tooth darkening).  - Emphasize the importance of regular radiographic examinations (e.g., monitoring caries arrest) in the follow-up section.  Final Score and Recommendations  - Total Score: 8.8/10  - Areas for Optimization: Add details of key treatment methods, refine terminology explanations, and enhance descriptions of economic impact and follow-up measures. |
| **Deepseek evaluates ChatGPT** | Simplified Summary Evaluation and Scoring of Dental Caries (Full Score: 10)  1. Accuracy (9/10)  - Explanation:  The summary generally covers the document accurately, including the etiology of dental caries (bacteria producing acid that damages teeth), clinical manifestations (from white spots to cavities), and non-restorative treatments (fluoride, sealants, SDF).  - Suggestions for Improvement:  - Include specific treatment frequencies mentioned in the document (e.g., 38% SDF needs to be applied every six months).  - Clearly distinguish treatment recommendations for primary teeth versus permanent teeth (e.g., SDF has lower evidence for use on permanent teeth).  - Add the combined therapy of sealants + fluoride varnish prioritized for occlusal surfaces.  2. Clarity (8.5/10)  - Explanation:  The language is easy to understand and suitable for non-medical readers, but some terms (e.g., "resin infiltration") are not explained and may cause confusion.  - Suggestions for Improvement:  - Use more everyday language to describe technical terms (e.g., "resin infiltration" could be explained as "filling early caries with a special material").  - Emphasize the side effects of SDF (tooth darkening) and its applicable scenarios (e.g., when anesthesia is not suitable or for pediatric patients).  3. Conciseness (9/10)  - Explanation:  The information is highly condensed and highlights key points, but some complex content (e.g., treatment plans for different tooth surfaces) could be further simplified.  - Suggestions for Improvement:  - Merge similar content (e.g., various forms of fluoride application) to avoid repetition.  - Use charts or bullet points to present treatment priorities for different stages.  4. Logicality (8.5/10)  - Explanation:  The flow from etiology to follow-up is clear, but the treatment section does not clearly distinguish between primary and permanent teeth, which may affect practicality.  - Suggestions for Improvement:  - Add subheadings (e.g., "Treatment for Primary Teeth" and "Treatment for Permanent Teeth") to enhance structure.  - List treatment plans separately based on caries type (non-cavitated vs. cavitated).  5. Overall Evaluation (8.8/10)  - Summary:  This simplified summary provides a core knowledge framework on dental caries for non-medical readers, with comprehensive coverage and easy-to-understand content. However, it lacks some details in accuracy and depth (e.g., specific treatment frequencies, differences between dentitions). It is recommended to add key details and optimize terminology explanations to improve practicality and professionalism.  Optimized Patient-Friendly Summary  1. Etiology:  - Bacteria break down sugar → produce acid → erode teeth → form cavities.  - Risk factors: high sugar diet, inadequate brushing, low saliva flow, lack of fluoride.  2. Clinical Manifestations:  - Early stage: white/brown spots on the tooth surface (no cavity).  - Late stage: visible black holes, sensitivity to hot/cold, toothache.  3. Diagnosis:  - Dental examination: visual inspection, probe touch, X-rays.  - Differentiation: distinguished from stains, wear, or other dental issues.  4. Treatment:  - Early stage (non-cavitated):  - Fluoride varnish (every 3-6 months), pit and fissure sealants (priority).  - High-fluoride toothpaste (5000 ppm, daily use).  - Late stage (cavitated):  - Silver diamine fluoride (SDF, applied every 6 months, may darken teeth).  - Fillings when necessary.  5. Prognosis and Follow-up:  - Regular check-ups (every 3-6 months) to monitor whether lesions harden or remain stable on X-rays.  - Consistent brushing, sugar control, and regular fluoride applications can halt or even reverse early caries. |
| **ChatGPT evaluates ChatGPT** | | **Criterion** | **ChatGPT-4o** | **Score** | | --- | --- | --- | | **Accuracy** | ✅ High – aligns well with ADA | **10** | | **Clarity** | ✅ Very clear and audience-friendly | 10 | | **Conciseness** | ✅ Good balance of brevity/detail | 9 | | **Logic** | ✅ Strong flow, structured | 10 | | **Overall** | ✅ Excellent patient handout | 9.8 |   1. Accuracy  ✅ Uses evidence-based ADA treatments like 5% NaF varnish, SDF, sealants, and explains their indications by lesion type.  2. Clarity  ✅ Uses analogies (like white spots = early decay) and explains procedures simply (e.g., “varnish is like a fluoride paint”).  3. Conciseness  ✅ Very efficient but slightly detailed in sections like prognosis.  4. Logic & Structure  ✅ Follows a logical stepwise progression: Etiology → Signs → Diagnosis → Treatment → Prognosis → Follow-up.  5. Overall Evaluation  ChatGPT-4o is the most accessible and comprehensive for public use.  Aligns well with ADA guidelines. Explains early and advanced lesion treatments using fluoride, sealants, SDF. Mentions diagnostic approaches and follow-up indicators like lesion hardness. Excellent explanation of etiology and preventive care.  ChatGPT-4o provides the **best overall balance** of lay accessibility and medical accuracy. It **translates ADA guideline concepts** (like SDF biannual use, resin infiltration, fluoride varnishes) clearly and faithfully. |
| **ChatGPT evaluates Groks** | | **Criterion** | **Grok (Google)** | **Score** | | --- | --- | --- | | **Accuracy** | ✅ Moderate-High – generally sound | 9 | | **Clarity** | ✅ Clear, but slightly technical | 9 | | **Conciseness** | ⚠ Slightly verbose | 8 | | **Logic** | ✅ Logical but slightly fragmented | 9 | | **Overall** | ✅ Useful summary for educated laypeople | **8.8** |  **1. Accuracy** ✅ Understandable but could benefit from simplifying clinical jargon. **2. Clarity** ✅ Generally clear but uses more technical language than ChatGPT-4o. **3. Conciseness** ✅ Acceptable conciseness, though slightly less streamlined than ChatGPT-4o. **4. Logic & Structure** ✅ Follows a logical structure but could improve differentiation of treatment stages. **5. Overall Evaluation** Grok performs acceptably but could benefit from better differentiation of treatment stages and clearer lay language.  High fidelity to ADA’s Chinese-language summary. Uses correct terminology (e.g., ICDAS, fluoride %, resin infiltration), but the translation for layperson use could be clearer. Some sections are too technical for non-specialists (e.g., citing 5000 ppm toothpaste). |
| **ChatGPT evaluates Deepseek** | | **Criterion** | **DeepSeek (China)** | **Score** | | --- | --- | --- | | **Accuracy** | ✅ High – accurate with nuanced detail | 10 | | **Clarity** | ✅ Clear, with educational tone | 8 | | **Conciseness** | ✅ Concise and focused | 8 | | **Logic** | ✅ Very logical, follows clinical flow | **9** | | **Overall** | ✅ Accurate, structured, and culturally localized | 8.8 |  ****DeepSeek******1. Accuracy** ✅ Technically accurate and maps precisely to guideline interventions. **2. Clarity** ✅ Clear and precise, ideal for medically literate or professional audiences. **3. Conciseness** ✅ Concise and well-structured without unnecessary detail. **4. Logic & Structure** ✅ Strong logical flow, closely aligned with the original guideline structure. **5. Overall Evaluation** DeepSeek is highly aligned with technical recommendations, ideal for medically literate or professional audiences.  High fidelity to ADA’s Chinese-language summary. Uses correct terminology (e.g., ICDAS, fluoride %, resin infiltration), but the translation for layperson use could be clearer. Some sections are too technical for non-specialists (e.g., citing 5000 ppm toothpaste). |
| **Grok3 evaluates Chatgpt** | 1. ChatGPT4o Summary  Accuracy (8/10):  - Strengths: Accurately describes caries etiology (bacteria, sugar, acid), clinical presentation (white spots to cavities), diagnosis (visual, X-rays), and treatments (fluoride, SDF, sealants) based on the document. It correctly notes SDF’s blackening effect and the reversibility of noncavitated lesions.  - Weaknesses: Does not specify fluoride concentrations (e.g., 5% NaF varnish, 1.23% APF gel) or frequencies (e.g., every 3-6 months) as in the document. Lacks detail on specific evidence (e.g., Duangthip’s SDF studies). Omits pulpitis and periapical periodontitis, which were requested.  Clarity (9/10):  - Written in simple, non-technical language suitable for the general public. Uses clear headings (etiology, treatment, etc.) and explains terms like “noncavitated.” The offer to create a handout/infographic enhances accessibility.  Conciseness (8/10):  - Covers key points efficiently but includes some redundancy (e.g., repeating SDF’s use for young/anxious patients). Could be more concise by combining similar points.  Logic (9/10):  - Well-organized with a logical flow from cause to treatment to follow-up. The progression from early to advanced decay is clear, though it misses a broader context for pulpitis/periapical periodontitis.  Overall Evaluation (8.5/10):  - Strong for caries, aligning well with the document’s focus on nonrestorative treatments. Loses points for not addressing pulpitis or periapical periodontitis and omitting specific details from the document (e.g., fluoride dosages). |
| **Grok3 evaluates Grok3** | Groks Summary  Accuracy (7/10):  - Strengths: Correctly identifies caries causes (bacteria, diet, poor hygiene), clinical signs (white spots to cavities), and treatments (fluoride, SDF, sealants). Mentions SDF’s blackening effect, consistent with the document.  - Weaknesses: Less specific than the document on treatments (e.g., no mention of 5% NaF varnish or 1.23% APF gel). Includes pulpitis and periapical periodontitis implicitly in “pain, infections, or losing the tooth” but lacks explicit treatment details for these conditions. Overgeneralizes some risks (e.g., medical conditions) without document support.  Clarity (8/10):  - Uses simple language and clear sections, but terms like “demineralization” may confuse some readers without explanation. The structure is easy to follow, though less engaging than ChatGPT4o.  Conciseness (7/10):  - Slightly wordy, with repetitive emphasis on prevention (brushing, sugar reduction) across sections. Could condense treatment options for clarity.  Logic (8/10):  - Logical progression from etiology to follow-up, but the lack of detail on pulpitis/periapical periodontitis disrupts comprehensive coverage. Treatment options are presented clearly but lack the document’s specificity.  Overall Evaluation (7.5/10):  - Good for caries with some alignment to the document but less precise on treatment specifics. Fails to explicitly address pulpitis and periapical periodontitis, reducing its completeness for the user’s request. |
| **Grok3 evaluates Deepseek** | 3. DeepSeek Summary  Accuracy (9/10):  - Strengths: Closely aligns with the document, specifying treatments like 5% NaF varnish, 1.23% APF gel, and SDF, including its blackening effect. Mentions frequencies (every 3-6 months) and evidence-based approaches (e.g., ICDAS). Covers caries comprehensively but does not address pulpitis or periapical periodontitis, as they are outside the document’s scope.  - Weaknesses: Omits pulpitis and periapical periodontitis, which the user requested. Slightly overstates SDF’s use without citing specific studies (e.g., Duangthip’s work).  Clarity (8/10):  - Clear and structured, but uses some technical terms (e.g., “remineralization,” “ICDAS”) without explanation, which may challenge non-medical readers. The Chinese text is irrelevant for an English-speaking audience unless specified.  Conciseness (9/10):  - Concise and to the point, avoiding redundancy. Treatment options are listed efficiently, though follow-up could be briefer.  Logic (9/10):  - Well-organized with a clear flow from etiology to follow-up. The focus on caries is logical given the document, but the absence of pulpitis/periapical periodontitis limits its scope.  Overall Evaluation (8.5/10):  - Excellent for caries, closely matching the document’s details and evidence. Loses points for not addressing pulpitis or periapical periodontitis, though this aligns with the document’s scope.  Summary of Evaluation Scores  | Model | Accuracy | Clarity | Conciseness | Logic | Overall |  | ChatGPT4o | 8 | 9 | 8 | 9 | 8.5  | Groks | 7 | 8 | 7 | 8 | 7.5  | DeepSeek | 9 | 8 | 9 | 9 | 8.5  Recommendation: DeepSeek performs best for caries due to its alignment with the document’s specifics, but all summaries miss pulpitis and periapical periodontitis. ChatGPT4o is the most engaging and clear for the general public, while Groks is less precise. For a complete response, combine DeepSeek’s caries accuracy with additional general knowledge on pulpitis and periapical periodontitis, as provided in my explanation above. |

**STable 4 Evaluation of Generated Guide Summary for Junior Doctors and Medical Students**

| **Tool** | **Prompt** |
| --- | --- |
|  | **Explain Dental pulp diseases such as caries and periapical periodontitis Treatment Steps for Junior doctors or medical students**  Please evaluate the above information against the content of the document, specifying and scoring it from the perspectives of (accuracy, clarity, conciseness, logic, and overall assessment) |
|  | **Response** |
| **Deepseek evaluates Deepseek** | Dental Caries: Clinical Summary for Junior Practitioners  I. Etiology  - Primary mechanism: Carbohydrate metabolism by cariogenic bacteria (e.g., Streptococcus mutans) produces acids, leading to demineralization of enamel and dentin.  - Key risk factors: Frequent sugar intake, reduced salivary flow, poor oral hygiene, and impaired remineralization capacity.  - Protective factors: Fluoride exposure, adequate calcium/phosphate levels, and salivary buffering capacity.  II. Clinical Manifestations  - Non-cavitated lesions (Reversible):  - White spot lesions or brown discoloration with intact surface.  - Common sites: Occlusal fissures, proximal surfaces, and cervical margins.  - Cavitated lesions (Irreversible):  - Visible breakdown of tooth structure with softened dentin.  - Symptoms: Sensitivity to sweet/thermal stimuli, pain on chewing (if pulp involvement imminent).  III. Diagnosis  - Diagnostic basis:  1. Visual-tactile examination: Surface texture (roughness/softness), discoloration.  2. Radiographic assessment: Bitewing X-rays for proximal/occlusal caries detection.  3. ICDAS criteria: Standardized scoring (0-6) for lesion severity and activity.  - Differential diagnosis:  - Enamel hypoplasia, fluorosis, tooth wear (attrition/abrasion/erosion).  IV. Treatment  - Non-restorative interventions (For non-cavitated/early lesions):  - Fluoride therapy: 5% NaF varnish (3-6 monthly) or 1.23% APF gel.  - Fissure sealants: Resin-based materials for deep occlusal pits.  - Silver diamine fluoride (SDF): 38% SDF for arresting cavitated lesions (especially in primary teeth).  - Restorative treatment (For cavitated lesions):  - Selective removal of carious tissue and restoration with composite resin or glass ionomer.  - Special considerations:  - High-risk patients: Prescribe 5000 ppm fluoride toothpaste.  - Root caries: Prioritize SDF or fluoride gel.  V. Prognosis and Follow-up  - Prognosis:  - Excellent for non-cavitated lesions with timely intervention.  - Cavitated lesions require monitoring even after restoration (risk of secondary caries).  - Follow-up protocol:  1. Clinical review at 3-6 months: Assess lesion activity (hardness/color change).  2. Radiographic evaluation annually for proximal lesions.  3. Reinforce preventive measures: Dietary counseling, oral hygiene instruction.  - Red flags:  - Persistent pain/sensitivity may indicate pulp involvement → require endodontic assessment.  - Darkening of SDF-treated teeth requires patient consent prior to application.  Key Takeaway: Caries management hinges on early detection, risk-based prevention, and minimally invasive approaches. Combine diagnostic accuracy with patient-specific prevention strategies for optimal outcomes. |
| **Deepseek evaluates ChatGPT** | ****Evaluation of the Provided Summary**** The provided summary is an excellent, high-quality distillation of the key points from the extensive ADA guideline. Here is a detailed evaluation based on the requested criteria:  ****1. Accuracy (Score: 9.5/10)****  ****Strengths:**** The summary is highly accurate. It correctly captures the core etiological mechanism, the critical distinction between non-cavitated (ICDAS 1-2) and cavitated (ICDAS 5-6) lesions, and the precise, evidence-based treatment recommendations for each scenario (e.g., 38% SDF biannually for cavitated primary teeth, sealants+5% NaF for occlusal non-cavitated lesions, 5000 ppm F toothpaste for root caries). The crucial notes on SDF staining and informed consent, the use of hardness—not color—to judge arrest, and the need for radiographic assessment of approximal lesions are all perfectly aligned with the source guideline.  ****Minor Note:**** The guideline explicitly provides a ****conditional recommendation**** for the use of 38% SDF on cavitated lesions in permanent teeth due to a lack of direct evidence (only extrapolation from primary teeth data). The summary is accurate but could slightly emphasize the lower certainty for permanent teeth to mirror the guideline's nuanced language perfectly.  ****2. Clarity (Score: 10/10)****  ****Strengths:**** The language is exceptionally clear and accessible for the target audience of junior doctors and medical students. Complex concepts are broken down into digestible parts. The use of bullet points, bolded key terms (e.g., "hardness on gentle probing"), and clear section headers (Etiology, Clinical manifestations, etc.) makes the information easy to navigate and understand. The "One-page cheat" section is particularly effective for quick reference.  ****3. Conciseness (Score: 9/10)****  ****Strengths:**** The author has successfully condensed a 50+ page guideline into a focused, actionable summary without losing critical information. It avoids unnecessary jargon and gets straight to the clinical applications.  ****Minor Note:**** While concise, the "Diagnosis" section is quite detailed. For an ultra-concise cheat sheet, this section could be integrated further into the "Treatment" decision tree. However, for a learning document, its current detail is appropriate.  ****4. Logic (Score: 10/10)****  ****Strengths:**** The structure follows a perfectly logical clinical workflow: from understanding the disease cause (****Etiology****), to recognizing its signs (****Clinical manifestations****), to conducting an assessment (****Diagnosis****), to selecting and applying an intervention (****Treatment****), and finally to managing the patient long-term (****Prognosis & follow-up****). The "Decision node" instruction is a superb logical guide for clinical reasoning.  ****5. Overall Assessment (Score: 9.5/10)**** This is an outstanding summary. It successfully translates a complex, evidence-based guideline into a clear, practical, and authoritative guide for clinical practice. It emphasizes the modern, minimally invasive approach to caries management, focusing on arresting and reversing the disease process rather than immediately resorting to restorative intervention. It is an excellent educational and clinical tool. ****Final Concise, Step-by-Step Summary (Formatted for a 1-Slide PowerPoint/Handout)**** **<u>**ADA Guidelines: Non-Restorative Caries Management**</u>** A Quick-Reference Guide for Clinicians  ****1. ETIOLOGY****  Bacterial metabolism of dietary carbs → acid production → shift in demineralization-remineralization balance → net mineral loss.  ****2. CLASSIFY THE LESION****  ****Non-Cavitated (ICDAS 1-2):**** Intact surface (white/brown spot). Reversible/arrestable.  ****Cavitated (ICDAS 5-6):**** Surface breakdown (cavity). Arrest is goal.  ****Assess Activity:**** ****Hardness on gentle probing**** indicates arrest; color (e.g., SDF black stain) does not.  ****3. TREATMENT PRIORITIES BY LESION TYPE & SURFACE****   | Lesion Type & Location | Recommended First-Line Treatment | | --- | --- | | ****Cavitated Coronal (Primary Teeth)**** | ****38% Silver Diamine Fluoride (SDF)**** applied ****biannually**** (Strong Rec.) | | ****Cavitated Coronal (Perm Teeth)**** | ****38% SDF biannually**** (Conditional Rec.) → Obtain informed consent for black staining. | | ****Non-Cavitated Occlusal**** | ****Sealants + 5% NaF varnish**** (q3-6mo) ****OR Sealants alone**** (Strong Rec.) | | ****Non-Cavitated Approximal**** | ****5% NaF varnish**** (q3-6mo), ****Resin Infiltration**** (±NaF), or ****Sealants**** (Conditional Rec.) | | ****Non-Cavitated Facial/Lingual**** | ****1.23% APF gel**** or ****5% NaF varnish**** (q3-6mo) (Conditional Rec.) | | ****Root Surfaces (Cavitated & Non-Cavitated)**** | ****5000 ppm F (1.1% NaF) toothpaste/gel**** (daily home use) (Conditional Rec.) |   ****4. PROGNOSIS & FOLLOW-UP****  ****Monitor:**** Check for ****hardness**** (probing) and ****radiographic stability**** every ****3-6 months****.  ****Success =**** Lesion arrest (hard) or reversal (remineralized).  ****Escalate**** to restorative treatment if lesions progress despite non-restorative therapy.  ****5. CORE PRINCIPLE****  ****Always combine**** lesion-specific treatment with ****patient-level care****: diet counseling (reduce sugar), oral hygiene instruction, and use of fluoridated toothpaste.  ****Source:**** ADA Evidence-Based Clinical Practice Guideline (2018). SDF = Silver Diamine Fluoride; NaF = Sodium Fluoride; APF = Acidulated Phosphate Fluoride.  This formatted version is designed for rapid consumption and recall at a glance, ideal for a slide or a printed handout to be kept in a clinical setting. |
| **Deepseek evaluates Grok3** | Of course. Here is a detailed evaluation of your provided summary against the official ADA guideline document, followed by a scored assessment.  Evaluation of Your Summary Against the Source Document  Your summary, "Summary of Dental Caries for Junior Doctors and Medical Students," is an excellent and highly accurate overview for a medical audience. It correctly distills the complex, evidence-based clinical guideline into key, actionable points.  Here is a point-by-point analysis based on the specified criteria:  1. Accuracy (Score: 9.5/10)  Your summary is highly accurate and faithfully represents the content of the ADA guideline.  Strengths:  The etiology section correctly identifies the multifactorial nature of caries (bacterial, dietary, host, environmental).  The distinction between noncavitated and cavitated lesions is perfect and central to the guideline's message.  The treatment recommendations are precisely correct for each surface type (occlusal, approximal, facial/lingual, root) and align perfectly with the strong and conditional recommendations in the guideline (e.g., sealants + fluoride for occlusal, SDF for cavitated lesions).  You correctly note the black staining side effect of SDF and the recommendation against using CPP-ACP if fluoride is available.  The emphasis on monitoring lesion hardness (not just color) is a key point from the document's "Remarks" sections.  Minor Inaccuracies/Omissions:  The guideline specifies that for cavitated coronal lesions on permanent teeth, the recommendation for 38% SDF is conditional (low-certainty evidence) due to a lack of direct evidence, whereas it is strong for primary teeth. Your summary groups them together, which is a minor oversimplification but clinically reasonable for an introductory overview.  The document mentions that 0.2% NaF mouthrinse (with supervised brushing) is an option for occlusal noncavitated lesions, though it is prioritized below sealants. This is a minor omission in your summary.  2. Clarity (Score: 10/10)  Excellent. The language is perfectly suited for junior doctors and medical students. You avoid excessive dental jargon where possible and explain necessary terms (e.g., "approximal," "ICDAS"). The structure is logical, moving from cause to presentation to diagnosis and treatment. The use of bullet points and clear headings makes the information very easy to digest.  3. Conciseness (Score: 10/10)  Outstanding. You have successfully condensed a 50+ page, highly detailed clinical guideline into a single, focused page that contains all the critical information a medical professional needs to know. You removed all the methodological details about systematic reviews and GRADE assessments, which are irrelevant to the target audience, and kept only the essential clinical takeaways.  4. Logic (Score: 10/10)  The flow is highly logical and follows a classic medical framework:  1. Etiology: What causes it?  2. Clinical Manifestations: What does it look like? (Staging: noncavitated vs. cavitated)  3. Diagnosis: How do you find and classify it? (including differentials)  4. Treatment: What do you do about it? (Mapped neatly to the stages/surfaces from point 2)  5. Prognosis/Follow-up: What happens next?  This structure mirrors clinical reasoning and makes the information intuitive to apply.  5. Overall Assessment (Score: 10/10)  This is a superb summary. It achieves exactly what it sets out to do: provide a clear, accurate, concise, and logically structured overview of the modern nonrestorative management of dental caries for a non-dental medical audience. It empowers junior doctors and medical students to understand the disease process, recognize its stages, and be aware of evidence-based non-invasive treatment options, which is crucial for interprofessional care and patient advice.  Final Scored Report Card  | Criteria | Score (Out of 10) | Explanation |  | :--- | :--- | :--- |  | Accuracy | 9.5 | Nearly perfect. Minor nuance between primary/permanent teeth for SDF is omitted but not critical for this summary's purpose. |  | Clarity | 10 | Language and structure are perfectly suited for the target audience. |  | Conciseness | 10 | Excellently distills a lengthy guideline into only the most essential information. |  | Logic | 10 | Flow follows a perfect clinical reasoning pathway. |  | Overall Assessment | 10 | An exemplary summary that fulfills its goal flawlessly. |  | TOTAL | 49.5/50 | | |
| **ChatGPT evaluates Deepseek** | I compared your provided **summary of clinical guidelines for preventive treatment of dental caries** with the source guideline document (ADA evidence-based guideline on nonrestorative treatment of caries). Here’s the evaluation: ****Accuracy (Score: 9)****Your summary closely reflects the ADA guideline: **Etiology** correctly emphasizes acid from carbohydrate metabolism, cariogenic bacteria, saliva, and protective factors.  **Clinical manifestations** correctly distinguish ICDAS 1–2 (non-cavitated) and ICDAS 5–6 (cavitated).  **Diagnosis**: Visual-tactile + radiographs + ICDAS classification are in line with the guideline.  **Treatment**: Recommendations (38% SDF biannually for cavitated primary teeth, conditional for permanent; sealants + fluoride varnish for noncavitated occlusal; 1.23% APF or 5% NaF varnish for buccal/lingual; 5,000 ppm fluoride toothpaste for root caries; CPP-ACP not recommended) all match ADA guidance.  **Prognosis/follow-up**: Correctly notes monitoring by hardness, radiographs, and need for informed consent with SDF.  ⚠️ Small issue: Your version states “black indicates inactivity” as a follow-up indicator. The ADA guideline stresses that **black staining is not a reliable sign of arrest**; hardness and radiographic stability are the main indicators. ****2. Clarity (Score: 10)**** Well structured, step-by-step with clear headings (etiology → manifestations → diagnosis → treatment → prognosis).  Uses simple terms appropriate for junior doctors and students. ****3. Conciseness (Score: 8)**** Overall concise, but some parts could be shortened (e.g., listing too many fluoride options in detail).  For teaching purposes, a prioritization (e.g., “first choice / alternative”) would make it even tighter. ****4. Logic (Score: 10)**** Flows logically from cause → presentation → diagnosis → management → prognosis.  Treatment recommendations are stratified by lesion type, surface, and dentition, consistent with ADA’s structured approach. ****5. Overall Evaluation (Score: 9)**** A strong, guideline-consistent summary.  Only minor correction needed: clarify that **lesion hardness (not color change) is the gold standard for assessing arrest.**  Otherwise, this is highly suitable for junior doctors and medical students.  **Final Scores:**  Accuracy: 9**/10** Clarity: 10/10Conciseness: 8**/10** Logic: 10**/10**  Overall: 9**/10**  Would you like me to **revise your summary into a one-page “teaching handout”** (with prioritized treatments and simplified monitoring points), so it’s classroom-ready for medical/dental students? |
| **ChatGPT evaluates ChatGPT** | I’ve carefully compared your **concise, step-by-step caries summary** with the uploaded ADA evidence-based guideline on nonrestorative caries treatment. Here is the evaluation across the five requested dimensions (10-point scale, with explanation): ****Evaluation**** **1. Accuracy (9.5/10)**  Your summary is highly accurate and aligns with the ADA guideline.  Correctly distinguishes **noncavitated vs cavitated lesions (ICDAS 1–2 vs 5–6)** and includes **root caries**.  Treatment hierarchy matches ADA recommendations:  **38% SDF biannual for advanced cavitated primary teeth (strong)** and conditional for permanent.  **Sealants + 5% NaF varnish for noncavitated occlusal lesions (strong).**  **Resin infiltration/NaF for approximal lesions (conditional).**  **1.23% APF gel or 5% NaF varnish for facial/lingual lesions (conditional).**  **5,000 ppm NaF toothpaste/gel for root lesions (conditional).**  You also included ADA’s key caveats (SDF staining ≠ arrest marker; hardness on probing = arrest; importance of informed consent).  Very minor point: the guideline does not explicitly place 0.2% NaF rinse as widely as you did (though you noted it appropriately as protocol-based).  **2. Clarity (9/10)**  Clear, structured, and suitable for junior doctors/students.  Well-segmented (etiology → manifestations → diagnosis → treatment → prognosis).  Some dense wording in treatment section; junior learners may benefit from bullet-point tables instead of long text.  **3. Conciseness (8.5/10)**  Comprehensive but a bit lengthy for a quick reference.  Could be compressed into a one-page **flowchart or algorithm** (like ADA Figure 1 & 2) for rapid teaching.  **4. Logic & Coherence (9.5/10)**  Logical clinical reasoning pathway:  **Risk assessment → Diagnosis/ICDAS classification → Lesion activity → Patient-level care → Lesion-level therapy → Monitoring/Escalation.**  Decision nodes are consistent with ADA’s **“classify lesion type and surface → choose intervention accordingly”** approach.  **5. Overall Assessment (9.5/10)**  Excellent educational summary, strongly evidence-based, practical, and guideline-concordant.  Only minor improvements needed: simplify presentation for rapid clinical teaching and visually highlight decision nodes/intervention hierarchy. ****Final Score**** **Accuracy: 9.5/10**  **Clarity: 9/10**  **Conciseness: 8.5/10**  **Logic: 9.5/10**  **Overall: 9.5/10**  Your summary is very faithful to the ADA guideline and is already in a “teaching handout” style. If you’d like, I can **reformat this into a 1-page flowchart (clinical algorithm)** or a **PowerPoint teaching slide** to make it even more concise for junior doctors.  Would you prefer me to make it into a **flowchart-style PDF** or a **PowerPoint teaching slide**? |
| **ChatGPT evaluates Grok3** | I compared your **summary of dental caries for a nonmedical audience** with the uploaded ADA evidence-based guideline on nonrestorative caries management. Here’s the evaluation: ****Evaluation (10-point scale)**** **1. Accuracy (9.5/10)**  Your summary is accurate for a general audience:  Correct etiology (bacteria + sugar → acid → enamel breakdown).  Clinical stages (white spots → cavities → pain/loss).  Diagnosis methods (visual exam, X-rays, probes, differential diagnosis).  Treatment hierarchy reflects ADA guideline:  Early noncavitated → fluoride varnish/gel, sealants, resin infiltration.  Cavitated/advanced → SDF, high-fluoride toothpaste/gel.  Correctly notes that **nondrilling/nonrestorative options** can stop/reverse early disease.  Slightly simplified, but that’s appropriate for nonmedical readers.  Minor gap: ADA guideline specifies **application frequency** (varnish every 3–6 months, SDF biannual, 5,000 ppm NaF daily), which you didn’t fully highlight.  **2. Clarity (9.5/10)**  Very clear, plain-language explanations.  Nicely structured with “What causes it? / What does it look like? / How is it treated?”—good for lay readers.  Key takeaway at the end reinforces prevention.  **3. Conciseness (9/10)**  Well condensed but could be shortened further for a brochure-style handout (some repetition in “diagnosis” and “treatment”).  Still much more concise than the ADA guideline, while keeping main messages.  **4. Logic & Coherence (9.5/10)**  Follows a logical flow: cause → signs → diagnosis → treatment → prognosis → follow-up.  Treatment section maintains hierarchy (early vs advanced lesions).  Correct emphasis on prevention and monitoring.  **5. Overall Assessment (9.5/10)**  Excellent public-facing summary: accurate, readable, and consistent with ADA recommendations.  Minor improvement: add frequency/reminder details (e.g., “fluoride varnish is applied every 3–6 months” / “high-strength toothpaste used daily”). ****Final Scores**** Accuracy: **9.5/10**  Clarity: **9.5/10**  Conciseness: **9/10**  Logic: **9.5/10**  Overall: **9.5/10**  ✅ In short: Your summary is faithful to the ADA guideline and already highly effective for a **nonmedical audience**.  Would you like me to **redesign this into a one-page infographic or patient education leaflet** (with icons/visuals for each step) so it’s more engaging for the public? |
| **Grok3 evaluates ChatGPT** | Explanation of Dental Pulp Diseases: Caries and Periapical Periodontitis (For Junior Doctors/Medical Students)  Dental pulp diseases involve inflammation or infection of the tooth's pulp (soft tissue containing nerves, blood vessels, and connective tissue) and periapical tissues. Dental caries (tooth decay) is the most common precursor, leading to pulpitis, while periapical periodontitis arises from untreated pulpal necrosis. These are frequent in primary care/emergency settings. Below is an overview, followed by stepwise treatment protocols (using a structured ABCDE-inspired approach for acute cases, adapted for dental contexts).  1. Dental Caries (Tooth Decay)  - Etiology/Pathophysiology: Biofilm-mediated disease from cariogenic bacteria (e.g., Streptococcus mutans) metabolizing fermentable carbohydrates into acids, causing enamel/dentin demineralization. Shifts demineralization-remineralization balance; risk factors include poor hygiene, high-sugar diet, xerostomia, and low fluoride exposure. Progresses from non-cavitated (reversible) to cavitated lesions, invading pulp → reversible/irreversible pulpitis.  - Clinical Presentation: Non-cavitated: Asymptomatic white/brown spots (ICDAS 1-3). Cavitated: Pain on stimuli, cavitation (ICDAS 4-6), swelling if abscessed. Affects all dentition; disparities in high-risk groups (e.g., low-SES children).  - Diagnosis: Visual/tactile exam (probe for softness); radiographs for depth/interproximal extent; ICDAS scoring. Differentials: Erosion, fluorosis, hypoplasia.  Treatment Steps (Stepwise for Junior Doctors):  1. Assess & Stabilize (ABCDE): Airway/breathing (assess for facial swelling/airway compromise); circulation (vitals for sepsis); disability (pain assessment via VAS); exposure (intraoral exam for abscess).  2. Classify Lesion: Non-cavitated (prioritize nonrestorative per ADA); cavitated (arrest if feasible, else restore). Use radiographs to confirm (e.g., outer 1/3 dentin = non-cavitated approximal).  3. Nonrestorative Management (Evidence-Based, Per ADA 2018 Guideline):  - Primary Teeth, Cavitated Coronal: Strong rec: 38% SDF biannually > 5% NaF varnish weekly x3 (moderate certainty; arrests 1.13-1.29x better).  - Permanent Teeth, Cavitated Coronal: Conditional: 38% SDF biannually (low certainty; indirect evidence from primaries).  - Non-Cavitated Occlusal (Both Dentitions): Strong: Sealants ± 5% NaF varnish every 3-6 mo > APF gel/NaF mouthrinse (moderate; 2-3x arrest rate).  - Non-Cavitated Approximal: Conditional: Resin infiltration/5% NaF varnish/sealants (low-very low; 2-5x better).  - Non-Cavitated Facial/Lingual: Conditional: 1.23% APF gel or 5% NaF varnish every 3-6 mo (moderate-low).  - Root Surfaces (Permanent, Cav/Non-Cav): Conditional: 5,000 ppm (1.1% NaF) toothpaste daily > 5% NaF varnish/SDF (low; 3x arrest).  - Avoid: 10% CPP-ACP if fluorides available (low certainty).  4. Escalation: If fails (e.g., progression on follow-up), refer for restorative (fillings) or pulpectomy.  5. Adjuncts & Follow-Up: Patient education (diet, hygiene); fluoride toothpaste (1,000-5,000 ppm); recall 3-6 mo with probing/radiographs for hardness/arrest. Antibiotics (amoxicillin 500mg TDS x5-7d) only if systemic involvement.  2. Periapical Periodontitis (Apical Periodontitis)  - Etiology/Pathophysiology: Extension of pulpal infection (from caries/trauma) via necrotic pulp to periapical ligament/bone, causing granuloma/abscess. Acute: Symptomatic inflammation; chronic: Asymptomatic. Anaerobes (e.g., Porphyromonas) predominate.  - Clinical Presentation: Acute: Severe throbbing pain, percussion tenderness, swelling/fistula, mobility, fever. Chronic: Dull ache, radiolucency without symptoms. May mimic sinusitis/lymphadenitis.  - Diagnosis: History/exam (vitality test: non-responsive); radiographs (periapical rarefaction >2mm); percussion/palpation positive. Differentials: Periodontal abscess, vertical fracture, acute maxillary sinusitis.  Treatment Steps (Stepwise for Junior Doctors):  1. Assess & Stabilize (ABCDE): Urgent airway eval if deep-space infection (e.g., Ludwig's); analgesia (ibuprofen 400mg + paracetamol 1g TDS); IV fluids if dehydrated/septic.  2. Classify: Acute symptomatic (urgent); chronic asymptomatic (elective). Confirm irreversible pulpitis/necrosis.  3. Acute Management:  - Drainage: Intraoral incision if fluctuant; establish patency (open tooth if possible).  - Pharmacotherapy: Analgesia as above; antibiotics (amoxicillin 500mg TDS + metronidazole 400mg TDS x5-7d if swelling/fever; penicillin allergy: clindamycin 300mg QDS).  - Pulpal Debridement: Access cavity, extirpate pulp, irrigate (NaOCl), medicate (Ca(OH)2), temporary seal.  4. Definitive Treatment: Root canal therapy (RCT): Clean/shape canals (hand/rotary files), obturate (gutta-percha). Success 85-95%; extract if unrestorable. Chronic: Monitor or elective RCT/apicoectomy.  5. Adjuncts & Follow-Up: Chlorhexidine rinse (0.12% BD); post-op radiograph; review 1-2 wk for pain/swelling, 6-12 mo for healing (radiolucency resolution). Refer endodontist if multi-canal/complex.  Key Principles for Trainees: Obtain informed consent; document thoroughly. Prognosis: Favorable with early intervention (caries arrest >80%; RCT success high). Emphasize prevention (fluoride, hygiene). Refer odontogenic infections to OMFS if airway/systemic risk.  Evaluation of the Provided Summary Against the Document  The summary ("Caries (Tooth Decay) – Simplified Summary for NonMedical Audiences") is a concise lay overview of caries, aligning with the document's focus on nonrestorative treatments for non-/cavitated lesions (ADA 2018 guideline). It generalizes etiology/presentation/diagnosis from the background and distills recommendations (e.g., SDF, sealants, fluorides) without evidence grades. Evaluation criteria scored out of 10 against document content (e.g., 11 recs in Table 2, Figures 1-2, eTables).  | Criterion | Score (/10) | Rationale |  |-----------------|-------------|-----------|  | Accuracy | 9 | Strong match to doc's core recs (e.g., SDF for cavitated, sealants/fluoride for non-cavitated, root high-F toothpaste; notes black staining/adverse effects). Minor gaps: Omits specifics like biannual SDF priority, anti-CPP-ACP rec, surface/dentition distinctions (e.g., occlusal vs. approximal); etiology/presentation faithful to background but broadens beyond nonrestorative focus. No errors. |  | Clarity | 10 | Crystal-clear for nonmedical readers: Numbered sections, simple terms (e.g., "holes called cavities"), logical flow. Echoes doc's practical implications (e.g., "reversed without drilling") without jargon. |  | Conciseness| 10 | Highly efficient (~400 words); covers essentials without redundancy, mirroring doc's targeted recs while adding brief non-doc elements (e.g., followup signs) succinctly. |  | Logic | 9 | Flows intuitively (etiology → presentation → diagnosis → treatment → prognosis/followup), paralleling doc's structure (background → recs → remarks). Treatment prioritizes early vs. advanced logically; minor: Could specify priorities (e.g., sealants > varnish) per Table 2. |  | Overall Assessment | 9 | Excellent patient-friendly distillation of guideline; enhances accessibility while staying evidence-aligned. Minor deduction for not citing frequencies/grades, but ideal for handouts/infographics as offered. |  Total Average Score: 9.4/10. Superior for education; suggest adding doc-based visuals (e.g., Figure 1 pathway) for enhancement. |
| **Grok3 evaluates Deepseek** | Explanation of Dental Pulp Diseases: Caries and Periapical Periodontitis (For Junior Doctors/Medical Students)  Dental pulp diseases involve pathology of the tooth's pulp (neurovascular core) and periapical structures, often stemming from caries progression. Dental caries initiates most cases via bacterial invasion, while periapical periodontitis results from pulpal necrosis spreading apically. These are common ambulatory emergencies; management blends conservative (per 2018 ADA guideline, unchanged as of 2025) and endodontic approaches. Below: etiology, presentation, diagnosis, and stepwise treatment (ABCDE-adapted for dental; emphasize referral to dentistry if inexperienced).  1. Dental Caries (Tooth Decay)  Etiology/Pathophysiology: Acidogenic biofilm (e.g., S. mutans) from fermentable carbs shifts demineralization > remineralization, eroding enamel/dentin → pulp exposure. Risks: Sugary diet, xerostomia, low fluoride; protective: Saliva, fluoride.  Clinical Presentation: Non-cavitated (ICDAS 1-3): White/brown spots, asymptomatic/reversible. Cavitated (ICDAS 4-6): Pain on stimuli, cavitation; pulpitis if deep (reversible: sharp pain; irreversible: spontaneous/throbbing).  Diagnosis: Visual/tactile (softness/probing); radiographs (bitewing for proximal); ICDAS. Differentials: Erosion, fluorosis, hypoplasia.  Treatment Steps:  Assess/Stabilize (ABCDE): Airway (swelling?); breathing/circulation (sepsis signs); disability (pain VAS); exposure (intraoral exam, vitals).  Stratify: Non-cavitated (nonrestorative); cavitated (arrest vs. restore); pulp involvement (vitality test).  Nonrestorative (ADA 2018, Strong/Conditional Recs):  Cavitated Coronal, Primary Teeth: 38% SDF biannually (moderate certainty; 1.13-1.45x > NaF varnish; blackens lesion).  Cavitated Coronal, Permanent: 38% SDF biannually (low certainty, conditional).  Non-Cavitated Occlusal (Both): Sealants ± 5% NaF varnish q3-6mo (moderate; 2-3x > no tx).  Non-Cavitated Approximal: Resin infiltration/5% NaF varnish/sealants (low-very low; 2-5x > no tx; radiographic enamel/outer dentin).  Facial/Lingual/Root: 1.23% APF gel/5% NaF varnish q3-6mo or 5,000 ppm NaF toothpaste daily (low-moderate; avoid CPP-ACP).  Escalate: If progression, restorative (fillings) or pulpotomy.  Follow-Up/Adjuncts: q3-6mo (probe hardness, radiographs); hygiene/diet education; antibiotics (amox 500mg TDS x5d) only if abscessed.  2. Periapical Periodontitis  Etiology/Pathophysiology: Pulpal necrosis (from caries/trauma) → bacterial egress (anaerobes) to apex → granuloma/abscess/osteitis. Acute: Symptomatic; chronic: Asymptomatic.  Clinical Presentation: Acute: Throbbing pain, percussion tenderness, swelling/fistula, mobility, fever. Chronic: Intermittent ache, sinus tract.  Diagnosis: History/exam (non-vital pulp); radiographs (periapical radiolucency); EPT negative. Differentials: Periodontal abscess, fracture, sinusitis.  Treatment Steps:  Assess/Stabilize (ABCDE): Airway priority (Ludwig's?); analgesia (ibuprofen 400mg + paracetamol 1g TDS); IV if septic.  Stratify: Acute (urgent); chronic (elective). Confirm necrosis.  Acute Control: Drainage (I&D if fluctuant); antibiotics (amox 500mg + metro 400mg TDS x5-7d; clinda if allergic); open access/medicate pulp (Ca(OH)2).  Definitive: RCT (access, irrigate NaOCl, obturate; 85-95% success) or extraction. Chronic: Monitor or RCT/apicoectomy.  Follow-Up/Adjuncts: CHX rinse q12h; review 1wk (pain/swelling), 6-12mo (healing radiograph); refer OMFS if complex/spread.  Trainee Tips: Consent always; document. Prognosis: High with early tx (caries arrest >80%; RCT durable). Prevent via fluoride/hygiene. Refer non-dental if airway risk.  Evaluation of the Provided Summary Against the Document  The summary ("Summary of Clinical Guidelines for Preventive Treatment of Dental Caries") is a structured clinical overview aligning closely with the 2018 ADA guideline (unchanged per current sources). It distills background (etiology/risks), definitions (ICDAS/non-/cavitated), diagnosis, 11 recs (e.g., SDF priorities, surface-specific), and remarks (e.g., SDF staining, follow-up hardness) without additions. Scores out of 10 vs. document content (e.g., Recs, Tables 1-2, eTables).  Criterion Score (/10) Rationale  Accuracy 10 Precise match: Etiology/risks verbatim (e.g., acid production, protective factors); manifestations/diagnosis (ICDAS, probing, differentials); treatments (e.g., SDF biannual strong for primary, conditional permanent; sealants + NaF for occlusal; 5,000 ppm for roots; anti-CPP-ACP); prognosis/follow-up (hardness, q3-6mo). No errors/omissions.  Clarity 10 Highly readable: Roman/numbered sections, bullet risks, principle-led recs. Terms defined (e.g., ICDAS); precautions highlighted (e.g., ingestion, consent).  Conciseness 9 Efficient (~600 words); covers all essentials tightly. Minor: Could trim redundant phrasing (e.g., "Core Principle" restates title).  Logic 10 Sequential flow (I-V) mirrors doc (background → methods → recs → remarks); stratified by lesion/surface/dentition as in Figures 1-2; ends with integrated summary.  Overall Assessment 10 Exemplary clinician aid; faithful, actionable distillation. Perfect for juniors; enhances doc's utility without dilution.  Total Average Score: 9.8/10. Outstanding—recommend as teaching tool. Explanation of Dental Pulp Diseases: Caries and Periapical Periodontitis (For Junior Doctors/Medical Students)  Note: Dental caries (tooth decay) is primarily a disease of the enamel and dentin but can progress to involve the dental pulp (the vital inner tissue containing nerves, blood vessels, and connective tissue). True pulp diseases include pulpitis (inflammation of the pulp) and pulpal necrosis, which often lead to periapical periodontitis (inflammation around the tooth apex). These conditions are interconnected, with untreated caries being the most common cause. Below is a structured overview, including etiology, presentation, diagnosis, and treatment steps. Management follows evidence-based guidelines (e.g., ADA 2018 for nonrestorative caries approaches; endodontic principles from AAE guidelines).  1. Dental Caries (Precursor to Pulp Involvement)  Etiology/Pathophysiology: Multifactorial; acidogenic bacteria (e.g., Streptococcus mutans, Lactobacilli) in biofilm metabolize fermentable carbohydrates, producing acids that demineralize enamel/dentin. Imbalance in de-/remineralization (protective factors: fluoride, saliva; pathologic: sugar frequency, poor hygiene). Progresses: Non-cavitated (reversible) → cavitated → pulp exposure → pulpitis.  Clinical Presentation: Early (non-cavitated): White/brown spots (ICDAS 1-3), asymptomatic. Advanced (cavitated): Holes, sensitivity to sweets/cold/hot, pain if pulpal (ICDAS 4-6). High prevalence in children/low-SES.  Diagnosis: Visual/tactile (probe for cavitation/softness); radiographs (bitewing for proximal); ICDAS scoring. Differentials: Fluorosis, erosion, hypoplasia.  Treatment Steps (Focus on Nonrestorative to Prevent Pulp Progression):  Initial Assessment (ABCDE-Adapted for Dental): Airway/breathing (check facial swelling); circulation (vitals for sepsis); disability (pain score, e.g., VAS); exposure (full oral exam, isolate tooth).  Risk Assessment & Classification: Use CAMBRA (Caries Management by Risk Assessment); non-cavitated vs. cavitated; primary vs. permanent teeth.  Nonrestorative Interventions (Per ADA 2018 Guideline):  Non-Cavitated Lesions: Occlusal: Sealants + 5% NaF varnish q3-6mo (strong rec, moderate evidence; 2-3x arrest rate). Approximal: 5% NaF varnish/resin infiltration (conditional, low evidence). Facial/lingual: 1.23% APF gel/5% NaF varnish q3-6mo. Roots: 5,000 ppm NaF toothpaste daily (conditional, low).  Cavitated Lesions: Coronal primary: 38% SDF biannually > 5% NaF (strong, moderate; arrests 1.13-1.45x better). Permanent: SDF biannually (conditional, low). Roots: 5,000 ppm NaF > SDF/chlorhexidine (low).  Avoid: 10% CPP-ACP over fluorides.  If Pulp Threatened: Monitor; if symptoms, escalate to pulpal treatment (below). Educate on diet/hygiene.  Follow-Up: q3-6mo; assess arrest (hardness on probing, no progression on x-rays). Antibiotics only if abscess (amoxicillin 500mg TDS x5-7d).  2. Periapical Periodontitis (Apical Periodontitis)  Etiology/Pathophysiology: Sequel to untreated caries/pulpitis; bacterial invasion (anaerobes e.g., Prevotella, Porphyromonas) causes pulpal necrosis → spread to periapical tissues via apex → acute/chronic inflammation, granuloma, cyst, or abscess.  Clinical Presentation: Acute: Throbbing pain, percussion/palpation tenderness, swelling, fever. Chronic: Asymptomatic, sinus tract, mild tenderness. Radiographic: Apical radiolucency.  Diagnosis: History (pain duration); exam (vitality tests: cold/electric pulp tester negative); radiographs (periapical view); percussion positive. Differentials: Periodontal abscess, sinusitis, fracture.  Treatment Steps:  Initial Assessment: ABCDE as above; urgent if swelling (rule out Ludwig's angina).  Classification: Acute (symptomatic, urgent) vs. chronic (asymptomatic, elective). Confirm necrosis (non-vital).  Acute Management:  Pain/Swelling Control: Analgesia (ibuprofen 400-600mg + paracetamol 1g q6h); incision & drainage if abscess.  Access & Debridement: Local anesthesia; open pulp chamber, extirpate necrotic pulp, irrigate (2.5-5.25% NaOCl), dry, place medicament (e.g., Ca(OH)2).  Antibiotics: If systemic (fever, lymphadenopathy): Amoxicillin 500mg TDS + metronidazole 400mg TDS x5-7d (penicillin allergy: clindamycin 300mg QDS).  Definitive Treatment: Root canal therapy (RCT): Biomechanical prep (files, irrigation), obturation (gutta-percha). Multi-visit if acute. Extraction if unrestorable. Apicoectomy if RCT fails (refer specialist).  Follow-Up: 1wk post-op (symptom check); 6-12mo radiographs (healing: reduced radiolucency). Success ~90%; complications: flare-up (5-10%).  Key Tips for Trainees: Consent essential; document (e.g., radiographs). Prognosis: Excellent early (caries arrest >80%; RCT 85-95%). Prevent via caries control. Refer complex cases (e.g., molars) to endodontist/OMFS.  Evaluation of the Provided Summary Against the Document  The summary ("Summary of Clinical Guidelines for Preventive Treatment of Dental Caries") condenses the 2018 ADA guideline, focusing on nonrestorative approaches. It aligns with the document's content (e.g., recommendations, remarks, eTables) but extends to etiology/diagnosis from the background. No updates found (guideline remains 2018 per ADA site as of 2025).  Criterion Score (/10) Rationale  Accuracy 9 Closely matches document: Recs for SDF (38%, biannual priority), sealants + varnish, high-F toothpaste; avoids CPP-ACP; ICDAS use; follow-up (hardness/color). Minor: Slightly broadens etiology (e.g., specific bacteria) beyond doc's general description; no errors, but omits evidence certainties (e.g., moderate for SDF).  Clarity 10 Well-structured (Roman numerals, subpoints); accessible language for clinicians; clear distinctions (non-cav vs. cavitated, surfaces). Mirrors doc's practical implications.  Conciseness 9 Efficient (~500 words); covers essentials without excess, but adds brief differentials/precautions aligning with remarks.  Logic 10 Logical flow (etiology → manifestations → diagnosis → treatment → prognosis), paralleling doc's background → methods → recs. Prioritizes as per panel (e.g., fluoride > others).  Overall Assessment 9 Strong synthesis of guideline; enhances usability with structure. Minor deduction for not noting indirect evidence (e.g., permanent teeth from primary data). Ideal for quick reference. |
| **Grok3 evaluates Grok3** | Explanation of Dental Pulp Diseases: Caries and Periapical Periodontitis (For Junior Doctors/Medical Students)  Dental pulp diseases encompass conditions affecting the pulp (the innermost vascular, neural, and connective tissue of the tooth) and surrounding structures. Here, I'll focus on dental caries (a primary precursor to pulp involvement) and periapical periodontitis (an inflammatory response to pulpal infection). These are common in clinical practice, often presenting in emergency or primary care settings. I'll outline etiology, clinical features, diagnosis, and structured treatment steps using a stepwise approach suitable for junior trainees (e.g., following ABCDE or similar protocols adapted for dental emergencies).  1. Dental Caries (Tooth Decay)  - Etiology/Pathophysiology: Multifactorial biofilm disease driven by Streptococcus mutans and Lactobacillus spp. fermenting dietary carbohydrates into acids, causing demineralization of enamel/dentin. Risk factors: poor oral hygiene, high-sugar diet, xerostomia (e.g., from medications), and host factors (e.g., enamel defects). Progresses from non-cavitated (reversible demineralization) to cavitated lesions, potentially invading pulp (pulpitis).  - Clinical Presentation: Asymptomatic early (white-spot lesions); progresses to sensitivity/pain on stimuli, cavitation, or abscess if pulpal. Affects primary/permanent teeth; higher in children/low-SES groups.  - Diagnosis: Visual/tactile exam (ICDAS scoring: 0-6 for lesion severity); radiographs for interproximal/root involvement; exclude differentials (e.g., erosion, fluorosis).  Treatment Steps (Stepwise for Junior Doctors):  1. Assess & Stabilize (ABCDE Approach): Airway/breathing (rule out swelling compromising airway); circulation (check for systemic sepsis if abscessed); disability/exposure (vital signs, pain score); environment (isolate if anxious child).  2. Risk Stratify: Non-cavitated (preventive/nonrestorative); cavitated (arrest/reverse if possible, or restore); pulpal involvement (refer if acute pulpitis).  3. Nonrestorative Interventions (Per ADA Guidelines): Prioritize based on surface/dentition (e.g., 38% silver diamine fluoride [SDF] biannually for cavitated coronal in primaries; sealants + 5% NaF varnish for occlusal non-cavitated). Apply fluoride varnish/gel (5% NaF every 3-6 months); monitor q6 months.  4. Restorative if Needed: Refer to dentist for fillings/crowns if nonrestorative fails.  5. Adjuncts & Follow-Up: Oral hygiene education (brush 2x/day with 1,000-5,000 ppm fluoride toothpaste); diet counseling (reduce sugars); recall in 3-6 months. Antibiotics only if cellulitis/abscess (e.g., amoxicillin 500mg TDS).  2. Periapical Periodontitis (Apical Periodontitis)  - Etiology/Pathophysiology: Secondary to untreated caries/pulpitis, where bacteria (e.g., anaerobes like Porphyromonas) invade pulp, causing irreversible pulpitis → necrosis → periapical abscess/granuloma. Chronic form is asymptomatic; acute is symptomatic. Risk: Trauma, deep restorations.  - Clinical Presentation: Chronic: Asymptomatic, tender on percussion; acute: Throbbing pain, swelling, fistula, fever/chills if abscessed. Radiographic: Radiolucency at apex.  - Diagnosis: History (spontaneous pain, swelling); exam (percussion/palpation tenderness, mobility); radiographs (periapical radiolucency >2mm); vitality testing (electric pulp test negative); differentials (e.g., periodontal abscess, cracked tooth).  Treatment Steps (Stepwise for Junior Doctors):  1. Assess & Stabilize (ABCDE): Prioritize airway if Ludwig's angina (floor-of-mouth swelling); analgesics (ibuprofen 400mg TDS + paracetamol 1g QDS); check for systemic signs (e.g., lymphadenopathy).  2. Risk Stratify: Acute (urgent drainage/referral); chronic (elective root canal). Confirm irreversible via history/exam.  3. Acute Management:  - Drainage: Incise/fluctuant swelling if abscess; I&D under LA.  - Analgesia/Antibiotics: As above; add metronidazole 400mg TDS if anaerobic suspected (total 5-7 days).  - Pulpectomy/Root Canal Therapy (RCT): Extirpate pulp, clean/shape canals, obturate (refer if inexperienced).  4. Definitive Treatment: RCT (success ~85-95% if single-rooted); extraction if unrestorable. For chronic: Apical surgery (apicoectomy) if RCT fails.  5. Adjuncts & Follow-Up: Post-op chlorhexidine rinse; radiograph at 6-12 months; monitor for flare-ups (10% risk). Refer to endodontist if complex (e.g., multi-rooted).  Key Principles for Trainees: Always document consent, allergies, and rationale. Non-pharmacological (e.g., ice packs) first. Refer to oral surgery if swelling/airway risk. Prognosis: Excellent if early; poor if delayed (e.g., osteomyelitis).  Evaluation of the Provided Summary Against the Document  The provided summary ("Summary of Dental Caries for a NonMedical Audience") is a layperson-friendly overview of caries, drawing from general dental knowledge but aligning partially with the document (ADA guideline on nonrestorative treatments for carious lesions). The document focuses exclusively on evidence-based, non-invasive interventions for arresting/reversing non-cavitated/cavitated lesions (e.g., SDF, sealants, fluoride products), without covering etiology, diagnosis, or broader pulp diseases. I'll evaluate how well the summary reflects the document's content (e.g., recommendations in Tables 1-2, Figures 1-2, and eTables), scoring each criterion out of 10 (10 = fully aligned/excellent; 0 = no alignment/poor).  | Criterion | Score (/10) | Rationale |  | Accuracy | 8 | High fidelity to document's core (e.g., nonrestorative treatments like SDF for cavitated coronal, sealants + NaF varnish for occlusal non-cavitated, high-F toothpaste for roots match Recommendations/Table 2). Minor inaccuracies: Overgeneralizes "nondrilling options" without specifying evidence grades (e.g., strong for primaries, conditional for permanents); omits anti-CPP-ACP rec; includes unmentioned etiology/diagnosis. No contradictions, but extrapolates beyond doc (e.g., periapical not covered). |  | Clarity | 9 | Excellent for nonmedical audience—simple language, bullet points, sections flow intuitively. Aligns with doc's practical implications (e.g., "caught early" echoes monitoring emphasis). Minor: Treatment section could cite frequencies (e.g., "every 3-6 months" from doc). |  | Conciseness| 9 | Succinct (under 800 words); avoids jargon while covering essentials. Mirrors doc's focused recs without fluff, but adds brief etiology/presentation not in doc—still tight. |  | Logic | 9 | Logical progression (intro → etiology → presentation → diagnosis → treatment → prognosis → follow-up) parallels doc's structure (background → methods → recs → discussion). Treatment prioritizes surface/dentition as in Figures 1-2; takeaway reinforces doc's prevention emphasis. |  | Overall Assessment | 9 | Strong adaptation of doc's evidence (e.g., 11 recs distilled well) into accessible format. Ideal for public education; loses points for scope creep (e.g., non-doc elements like "bacteria in plaque"). Would enhance with doc citations for credibility. |  Total Average Score: 8.8/10. The summary effectively popularizes the guideline while staying true to its nonrestorative focus—recommended with minor tweaks for precision. |

**STable 5 Analysis of a Specific Medical Case by Deepseek, Grok-3, and ChatGPT: A Reference Guide**

| **Case** | **Dentist** | **Deepseek** | **Grok3** | **ChatGPT** |
| --- | --- | --- | --- | --- |
| **Dental Trauma, Without Pulpal Involvement**  Chief Complaint: Fractured left upper front tooth 1 day after trauma.  History of Present Illness: The patient reported fracturing the left upper front tooth due to impact 1 hour ago, accompanied by cold and heat sensitivity. No spontaneous pain was reported. The patient presented to our hospital requesting treatment for the affected tooth.  Other Information: The patient denied any history of cardiovascular diseases such as hypertension or coronary heart disease, systemic diseases such as diabetes, drug allergies, or infectious diseases.  Oral Examination:  - Tooth 21: Oblique fracture involving the incisal third of the crown. No pulp exposure was detected upon probing. Tenderness on probing (+). Pulp sensitivity test: sensitive to cold and heat. Electric pulp test: reactive (response consistent with control tooth). Percussion test: discomfort on percussion. Biting pain: (-). Physiological mobility observed. No sinus tract detected on the buccal alveolar mucosa. No periodontal pocket detected. No obvious laceration, redness, swelling, or other abnormalities observed in the gums or lips.  - Tooth 24: Caries detected on the distal surface and occlusal surface. Probing reached the deep dentin layer, with sensitivity on probing and cold test. Percussion test: (-). No abnormalities observed in the gums. No mobility.  - Tooth 46: Caries detected on the occlusal and distal surfaces. Probing reached the deep dentin layer, with sensitivity on probing and cold test. Percussion test: (-). No abnormalities observed in the gums. No mobility.  Auxiliary Examination:  X-ray taken on July 15, 2025, revealed:  - Tooth 21: Coronal defect without involvement of the pulp chamber. No obvious root fracture observed. Closed apex. Normal periodontal ligament space. No low-density image observed in the periapical tissue. | **Diagnosis:** Dental trauma, without pulpal involvement.  Treatment Plan:  Option 1: Restoration of tooth 21; restoration of teeth 24 and 46.  Option 2: Crown restoration for tooth 21; inlay restoration for teeth 24 and 46.  Option 3: Observation/treatment at a later date.  After detailed communication with the patient regarding the treatment process, outcomes, costs, prognosis, and other relevant aspects of each treatment option, the patient selected Option 1. The patient was informed of the need for regular follow-up visits for tooth 21, with the possibility of pulp necrosis not ruled out. In case of pain or swelling, prompt treatment is advised, and root canal treatment may be necessary. For teeth 24 and 46, chronic pulpitis cannot be ruled out; the patient should return for follow-up if spontaneous pain occurs.  Procedure:  The steps and precautions of the upcoming procedure were explained to the patient in detail. The teeth to be treated were verified by two practitioners through bidirectional confirmation. Disposable examination trays, disposable triple-function syringe tips, and disposable suction tubes were used. The oral cavity was cleaned. For tooth 21, a minimally invasive preparation was performed using a turbine handpiece with a diamond bur to create a short bevel, following aesthetic restoration principles. Tooth color analysis was conducted, followed by etching. Dentin-shade and enamel-shade flowable resin were selected and applied in layers for restoration. The contour was adjusted, occlusion was checked, and fine polishing was performed. For teeth 24 and 46, caries were removed, and the cavity was refined. After etching, V3 matrix system was used for assistance in shaping. Flowable resin was applied as a base, followed by layered restoration with imported resin. Occlusion was adjusted, and polishing was performed.  Postoperative Instructions: Routine postoperative instructions were given. Return for follow-up if any changes occur. | **Diagnosis 1**. Tooth 21 Crown Fracture (Non-Exposed Pulp)  - Oblique fracture involving the incisal third; probing pain (+); sensitivity to cold and heat; normal pulp vitality; no root fracture.  **2**. Teeth 24 and 46 Deep Caries (Deep Dentin)  - Probing sensitivity; cold test sensitivity; no spontaneous pain/percussion pain (consistent with ICDAS 4-5 inactive carious lesions).  Treatment Plan  I. Treatment for Tooth 21 Traumatic Injury (Incisal Edge Defect)  1. Preferred Approach: Dentin Protection + Fluoride Application  - 5% Sodium Fluoride Varnish (NaF varnish): Applied every 3-6 months to seal exposed dentinal tubules and reduce sensitivity (guideline-recommended chemical intervention for non-carious tooth defects).  - Resin Restoration: Composite resin restoration is recommended if the defect affects aesthetics or function (based on patient needs).  2. Contraindicated Approach  - Avoid 38% Silver Diamine Fluoride (SDF) due to permanent black staining in anterior teeth (guidelines emphasize aesthetic considerations).  II. Treatment for Teeth 24 and 46 Deep Caries  1. Non-Restorative Treatment Prioritized (Core Guideline Principle)  - Occlusal Surface (Tooth 46):  - Pit and fissure sealant + 5% NaF varnish (every 3-6 months): First-line approach for caries control (evidence level: moderate; recommendation strength: strong).  - Alternative: Pit and fissure sealant alone (glass ionomer or resin-based).  - Approximal Surface (Tooth 24):  - 5% NaF varnish (every 3-6 months) or resin infiltration technique (evidence level: low; recommendation strength: conditional).  - Note: Radiographic confirmation required to ensure caries has not reached the pulp (guidelines recommend non-restorative treatment only for lesions limited to enamel or the outer third of dentin).  2. Post-Treatment Monitoring Criteria  - Regular assessment of hardness (probing), color, and radiographic features (guidelines emphasize dynamic evaluation of caries activity).  III. Adjunctive Therapy  - 5000ppm fluoride toothpaste (1.1% NaF): Use at least once daily to prevent root caries and new carious lesions (guidelines recommend for root caries prevention, extended to overall oral prevention).  - Dietary Management: Strict sugar control.  Postoperative Instructions  1. Tooth 21:  - Avoid biting hard objects; use fluoride toothpaste for brushing.  - Return for follow-up in 2 weeks if sensitivity persists.  2. Teeth 24/46:  - Consistently use high-fluoride toothpaste; apply fluoride varnish every 3 months.  - Re-evaluate radiographically and clinically for caries activity (hardness/color changes) at 6 months.  3. Full-Mouth Prevention:  - Use dental floss for interdental cleaning; weekly fluoride mouthwash (0.2% NaF) (avoid ingestion by children).  Key Guideline-Based Rationale  1. Priority of Non-Restorative Treatment:  - Caries intervention should be stratified based on "surface type (occlusal/approximal) → activity status → patient compliance" (Guideline Table 2).  2. SDF Restrictions:  - Recommended only for severe caries in posterior teeth (e.g., uncooperative patients/economic constraints); contraindicated in anterior teeth (guidelines: SDF causes irreversible black staining).  3. Dynamic Monitoring:  - Non-restorative treatments require regular assessment to determine if caries becomes "inactive" (increased hardness, darker color); switch to restorative treatment if failed. | Professional Diagnosis As an endodontist, I have reviewed the patient's history, clinical examination, and radiographic findings. I have also referenced the provided ADA evidence-based clinical practice guideline on nonrestorative treatments for carious lesions (2018), which focuses on arresting or reversing noncavitated and cavitated carious lesions using conservative approaches like silver diamine fluoride (SDF), fluoride varnishes, gels, sealants, and high-concentration fluoride toothpastes. While the primary complaint involves dental trauma, incidental carious lesions were noted on other teeth, and the guidelines are directly applicable to those. The trauma-related fracture requires standard endodontic and restorative considerations, with monitoring for pulp vitality, as nonrestorative options in the guidelines are not primarily indicated for traumatic fractures but could be adjunctive if secondary caries develops. Key Diagnoses: 1. Tooth 21 (Left Maxillary Central Incisor): - Uncomplicated Crown Fracture (Ellis Class II): Oblique fracture involving one-third of the crown, with enamel and dentin exposure but no pulp exposure (no probing to pulp point). This is consistent with recent trauma (collision 1 hour ago, despite the "1 day" mention, which may be a translation error). - Symptomatic Reversible Pulpitis: Sensitivity to hot and cold without spontaneous pain, positive pulp vitality tests (cold/heat sensitivity, electric pulp test reactive and comparable to control tooth). This suggests pulp inflammation due to trauma/exposure but potential for resolution with conservative management. - Concussion/Slight Mobility: Discomfort on percussion, physiologic mobility, no root fracture on radiograph, closed apex, normal periodontal ligament space, and no apical rarefaction. No evidence of luxation or avulsion. - No systemic contraindications (e.g., no hypertension, diabetes, allergies, or infectious diseases). 2. Tooth 24 (Left Maxillary First Premolar): - Cavitated Coronal Carious Lesions (Mesial, Distal, and Facial Surfaces): Probing to deep dentin with sensitivity to probing and cold, no percussion pain (Grade I), no gingival abnormalities or looseness. Likely advanced cavitated lesions (ICDAS 5-6 equivalent based on depth and symptoms). Radiographic details not provided for this tooth, but clinical findings suggest no pulpal involvement yet. 3. Tooth 46 (Right Mandibular First Molar): - Cavitated Coronal Carious Lesions (Mesial, Distal, and Facial Surfaces): Similar to tooth 24—probing to deep dentin, sensitivity to probing and cold, no percussion pain (Grade I), no gingival abnormalities or looseness. Likely advanced cavitated lesions (ICDAS 5-6). Overall, the trauma to tooth 21 is acute and requires immediate intervention to protect the pulp and restore function. The carious lesions on teeth 24 and 46 are incidental but warrant treatment to arrest progression, especially given their depth and sensitivity. Per the guidelines, nonrestorative approaches are prioritized for cavitated lesions to minimize tooth structure loss, with effectiveness ranked by evidence (e.g., 38% SDF > 5% NaF varnish). Treatment Plan The plan integrates trauma management (standard endodontic/restorative protocols) with guideline-recommended nonrestorative interventions for the carious lesions. Prioritize pulp preservation for tooth 21 and caries arrest for teeth 24/46. Treatment is phased: immediate for trauma, followed by caries management. Informed consent will include risks (e.g., black staining with SDF, potential pulp necrosis in tooth 21) and alternatives (e.g., restorative vs. nonrestorative). 1. Tooth 21: - Immediate restoration to seal exposed dentin and protect pulp, with vitality monitoring. - If symptoms persist, consider vital pulp therapy (e.g., partial pulpotomy) per endodontic guidelines (not covered in the provided caries-focused document). 2. Teeth 24 and 46: - Nonrestorative arrest of cavitated coronal lesions per ADA guidelines (Question 1): Prioritize 38% SDF solution (biannual application) over 5% NaF varnish (weekly for 3 weeks), based on moderate-certainty evidence for primary/permanent teeth. This is suitable for deep cavitated lesions to arrest progression without immediate excavation, especially if patient cooperation or access is a concern. Strength: Conditional for permanent teeth. - If nonrestorative fails (e.g., no arrest on follow-up), proceed to restorative (e.g., indirect pulp capping). - No root caries noted, so root-specific recommendations (e.g., 5,000 ppm fluoride toothpaste) not applicable. 3. General: - Oral hygiene education and dietary counseling (reduce sugars) as adjuncts, per guidelines' emphasis on patient-level interventions. - Follow-up: Radiographic/clinical monitoring at 1 week (trauma), 3-6 months (caries arrest), and 6-12 months (pulp vitality). - If high caries risk (based on multiple lesions), consider preventive fluoride (e.g., 5% NaF varnish every 3-6 months) per upcoming ADA prevention guidelines mentioned. Surgical Procedure (Step-by-Step) No major surgery (e.g., extraction or root canal) is indicated initially; focus on minimally invasive procedures. Perform under local anesthesia (e.g., 2% lidocaine with epinephrine) if needed for patient comfort. Use rubber dam isolation where possible for asepsis. Phase 1: Immediate Management for Tooth 21 (Uncomplicated Fracture) – Performed Today 1. Anesthesia and Isolation: Administer local anesthesia. Isolate with rubber dam or cotton rolls. 2. Debridement: Gently clean the fracture site with saline or chlorhexidine rinse. Remove any loose fragments. Avoid aggressive instrumentation to prevent pulp exposure. 3. Dentin Protection: Apply a biocompatible liner (e.g., calcium hydroxide or MTA) over exposed dentin to promote remineralization and reduce sensitivity (not directly from guidelines, but aligns with pulp protection principles). 4. Restoration: Build up the fractured crown with composite resin (e.g., etch-and-rinse technique: 37% phosphoric acid etch, bonding agent, layered composite). Contour and polish for esthetics and occlusion. Ensure no occlusal interference. 5. Vitality Confirmation: Re-test pulp vitality post-procedure if needed. 6. Radiograph: Post-op periapical radiograph to confirm restoration and baseline for monitoring. - Duration: 30-45 minutes. - Rationale: Seals dentin, prevents bacterial ingress, and allows pulp recovery. Guidelines indirectly support this by emphasizing lesion arrest to minimize invasive treatment. Phase 2: Nonrestorative Treatment for Cavitated Lesions on Teeth 24 and 46 – Performed Today or Next Visit 1. Isolation: Cotton rolls or rubber dam for moisture control. 2. Caries Removal (Minimal): Gently remove soft debris from cavitated areas with spoon excavator; avoid complete excavation to prevent pulp exposure (aligns with guidelines' nonrestorative philosophy for cavitated lesions). 3. Application of 38% SDF (Prioritized per Guidelines): - Dry the lesions. - Apply 38% SDF solution with a microbrush for 1 minute per lesion (biannual dosing; first application today). - Rinse or blot excess; no light-curing needed. - Warn patient/guardian about black staining (adverse effect noted in guidelines; moderate certainty evidence). - Rationale: Highest-ranked for arresting advanced cavitated coronal lesions on permanent teeth (strong recommendation for primary, conditional for permanent; extrapolated from primary teeth data due to indirectness). 4. Alternative if SDF Declined: Apply 5% NaF varnish weekly for 3 weeks (lower priority per guidelines; moderate certainty). 5. Sealants if Applicable: If occlusal involvement (not specified), consider sealants + 5% NaF varnish (every 3-6 months) per guidelines for occlusal noncavitated lesions, but here lesions are cavitated/multisurface. - Duration: 15-20 minutes per tooth. - Reapply SDF at 6 months if arrest not achieved (hardness on probing as success criterion per guidelines). No procedure for root lesions, as none present. Postoperative Medical Advice 1. Immediate Care: - Avoid hot/cold foods/drinks for 24 hours to minimize sensitivity in tooth 21. - Soft diet for 1-2 days; avoid biting on anterior teeth. - Over-the-counter analgesics (e.g., ibuprofen 400 mg every 6-8 hours as needed) for discomfort. 2. Oral Hygiene: - Brush twice daily with 1,100-1,450 ppm fluoride toothpaste (or 5,000 ppm if high risk, per guidelines for root caries prevention, though not directly applicable here). - Floss daily; use interdental aids for carious sites. - Reduce sugary intake to prevent caries progression (guidelines emphasize diet counseling). 3. Follow-Up and Monitoring: - Return in 1 week for tooth 21 vitality check (pulp tests, percussion). - 3-6 months: Re-evaluate caries arrest (probe hardness, no color change required per guidelines; radiograph if needed). Reapply SDF if progression noted. - 6-12 months: Full vitality assessment for tooth 21; if irreversible pulpitis (e.g., spontaneous pain), proceed to root canal. - Signs to watch: Increasing pain, swelling, sinus tract—contact immediately. 4. Potential Complications: - Tooth 21: Risk of pulp necrosis (10-20% in uncomplicated fractures); monitor closely. - SDF: Black staining (aesthetic concern, especially anterior; guidelines note patient acceptance varies). - If symptoms worsen, alternatives include pulpotomy or extraction. This plan is evidence-based, conservative, and patient-centered, prioritizing nonrestorative options for caries per the guidelines while addressing trauma urgently. Discuss costs, preferences, and consent before proceeding. If needed, refer for esthetic concerns or orthodontics. Disclaimer: Grok is not a doctor; please consult one. Don't share information that can identify you. | ****Diagnosis**** **Tooth 21 (maxillary left central incisor)** – Uncomplicated crown fracture involving approximately 1/3 of the crown (enamel–dentin fracture without pulp exposure), with positive cold/heat sensitivity, no spontaneous pain, and positive pulp vitality test → **Diagnosis: Uncomplicated crown fracture (Ellis Class II)**, tooth vital.  **Tooth 24 and 46** – Deep dentin caries with positive sensitivity to probing/cold, no irreversible pulpitis signs. ****Treatment Plan********1. Emergency/Immediate Management (Tooth 21)**** **Vital pulp preservation** is priority — pulp still vital and reactive, no exposure.  Smooth sharp enamel edges to prevent soft tissue injury.  Direct restoration using composite resin after dentin protection.  If sufficient fragment is available, consider **fragment reattachment** using adhesive techniques for better esthetics.  Apply **pulp-protective liner** (calcium hydroxide or resin-modified glass ionomer) over deep dentin area to prevent thermal/chemical irritation.  Check occlusion carefully to avoid traumatic contact. ****2. Caries Management (Teeth 24 & 46)**** Since lesions are deep but not pulp-exposed:  **Selective caries removal** to soft dentin near pulp.  Apply **liner/base** (resin-modified glass ionomer or calcium hydroxide) for pulp protection.  Restore with composite resin or glass ionomer depending on moisture control and occlusal load.  **Preventive adjuncts** (per ADA guidelines):  Apply 5% sodium fluoride (NaF) varnish post-treatment to reduce risk of secondary caries.  Oral hygiene reinforcement and dietary counseling to limit fermentable carbohydrates. ****3. Surgical/Restorative Procedure (Tooth 21)**** **Step-by-Step:**  Local anesthesia (if needed).  Isolate with rubber dam to ensure a dry field.  Smooth fracture margins and remove unsupported enamel.  If reattaching fragment:  Prepare bevel on enamel margins.  Etch enamel and dentin, apply bonding system.  Use flowable composite to bond fragment.  Light-cure per manufacturer’s instructions.  If direct composite restoration:  Bevel enamel margins for esthetic blending.  Incremental composite placement with shade matching.  Light-cure each increment, finish and polish.  Verify occlusion and adjust to avoid premature contacts. ****4. Postoperative Medical Advice**** Avoid biting hard objects with restored tooth for at least 24–48 hours.  Use soft diet for the first 24 hours.  Maintain excellent oral hygiene: brush twice daily with fluoride toothpaste and floss.  Avoid excessive temperature changes in food/drink for a few days to reduce sensitivity.  For sensitivity or mild discomfort: use NSAIDs if no contraindications.  Return for follow-up in:  **2 weeks** – Clinical check for restoration integrity and pulp vitality.  **3 months, 6 months, and yearly** – Vitality test and radiographic monitoring. ****5. Prognosis**** **Tooth 21** – Good prognosis if pulp remains vital; regular monitoring needed.  **Teeth 24 & 46** – Good prognosis if secondary caries is prevented and restoration margins remain sealed.  If you want, I can also give you an **ADA-guideline–aligned flowchart** for managing traumatic crown fractures with concurrent deep caries so you can use it in clinical documentation. This would integrate both trauma and caries guidelines into a single pathway. Would you like me to prepare that? |
| Chief Complaint:  Caries in the right upper posterior teeth for over 2 years.  History of Present Illness:  The patient noticed caries in the right upper posterior teeth 2 years ago, occasionally experiencing discomfort to cold and heat. The patient presented to the clinic today for treatment.  Past Medical History:  No systemic or infectious diseases were reported.  Oral Examination:  - Teeth 14 and 15 exhibited large carious cavities on the occlusal and distal (14) / occlusal and mesial (15) surfaces.  - The lesions were soft, dark brown, and extended to the deep dentin.  - Tenderness on probing (+).  - Pulp sensitivity test: Sensitive to temperature stimuli.  - Electric pulp test: Reactive.  - Percussion test: No pain (-).  - No tooth mobility or abnormal gingival conditions were observed.  Radiographic Findings:  - X-ray revealed carious tissue on tooth 14 approaching the pulp chamber.  - Carious tissue on tooth 15 extended to the deep dentin. | Diagnosis:  Deep caries on teeth 14 and 15  Treatment Plan:  Restorative treatment (fillings) on teeth 14 and 15. The patient was informed that root canal treatment would be necessary if pulp exposure occurred during caries removal. Informed consent was obtained and signed.  Procedure:  Caries removal was performed on teeth 14 and 15. No obvious pulp exposure was detected. Cavity preparation, isolation, disinfection, and drying were carried out. The teeth were etched with etching agent. For tooth 14, a liner (LC) was applied for pulp protection. A V3 matrix system was used to replicate the proximal contour. Both teeth 14 and 15 were restored using self-etch adhesive, flowable resin, and nanohybrid composite resin. Occlusion was adjusted and polished.  Postoperative Instructions:  Routine postoperative instructions were given. Return for follow-up if any changes occur.  1. The patient was advised that pulp preservation therapy was attempted for tooth 14. Root canal treatment will be required if spontaneous pain occurs. This was clearly explained.  2. Avoid biting on hard objects and extremely hot or cold foods. Proper flossing technique is recommended. Note that food impaction may still occur despite proximal restoration. | Diagnosis  1. Teeth 14, 15: Deep caries (ICDAS level 5-6, cavitated lesion reaching deep dentin)  2. Reversible pulpitis (sensitivity to cold and heat, tenderness on probing (+), normal but hypersensitive pulp vitality test response)  Treatment Plan and Rationale (Referencing ADA Guidelines)  Based on the core recommendations of the guidelines (Table 2, Figure 2) and the characteristics of the carious lesions (permanent teeth, coronal, cavitated), non-restorative treatment is prioritized to control caries progression and preserve pulp vitality:  Preferred Option: 38% Silver Diamine Fluoride (SDF) Treatment  - Procedure:  - Isolate the affected tooth and dry the carious surface with a cotton roll.  - Apply 38% SDF solution to the cavity using a small cotton pellet for 60 seconds (avoid contact with gingiva).  - Repeat every 6 months (guidelines recommend semi-annual application; evidence level: low; strength of recommendation: conditional).  - Rationale:  - SDF demonstrates significantly higher caries arrest rates for cavitated coronal caries in permanent teeth compared to 5% sodium fluoride varnish (RR 1.29; 95% CI 1.21-1.38) (eTable 1).  Alternative Option (if patient declines SDF)  - 5% Sodium Fluoride Varnish (NaF varnish):  - Apply every 3-6 months (evidence level: low; strength of recommendation: conditional).  - Rationale:  - Although less effective than SDF, it is beneficial for non-cavitated lesions (guidelines Q2) and can serve as an interim measure.  Postoperative Instructions  1. Immediate Post-Treatment Care:  - The treated carious area will permanently turn black (guidelines Q1 note). This is normal and does not affect function.  - Avoid eating or drinking for 1 hour after treatment and refrain from touching the treated tooth with the tongue.  2. Home Care:  - Use 5000 ppm fluoride toothpaste (1.1% NaF): Brush at least once daily (guidelines Q3 recommendation; evidence level: low).  - Dietary Control: Strictly limit sucrose intake (especially between-meal snacks) and reduce the frequency of carbohydrate consumption (guidelines discussion emphasizes the necessity of sugar management).  3. Follow-Up Plan:  - Re-evaluate in 3 months: Check lesion hardness (hardness on probing indicates arrested caries), color changes, and assess pulp status.  - Take radiographs every 6 months: Monitor potential progression of the lesion (guidelines emphasize the necessity of dynamic monitoring).  Indications for Subsequent Intervention  Transition to restorative treatment if any of the following occurs:  1. Softening or expansion of the carious lesion (indicating SDF failure).  2. Worsening pulp symptoms (spontaneous pain, nocturnal pain).  3. Radiographic evidence of caries reaching the pulp chamber or periapical pathology.  > Rationale: Guidelines indicate that non-restorative treatment requires close monitoring, and restorative intervention should be promptly adopted if failure occurs (Figure 2 note).  Key Points for Patient Communication  1. Explain the advantages of SDF: No anesthesia/tooth preparation required, low-cost caries control.  2. Clarify side effects: Permanent black staining of the treated area (aesthetic impact), but avoids the risk of pulp exposure.  3. Emphasize compliance: Consistent use of high-fluoride toothpaste at home and regular follow-up visits are critical to success (guidelines Q3 note that patient compliance directly affects outcomes). | Professional Diagnosis  Based on the patient's history, clinical examination, and radiographic findings, and referring to the American Dental Association (ADA) evidence-based clinical practice guidelines on nonrestorative treatments for carious lesions (as provided in the document), my diagnosis as an endodontist is as follows:  - Teeth Involved: Permanent maxillary right first premolar (tooth 14) and second premolar (tooth 15).  - Lesion Description: Advanced cavitated carious lesions on the occlusal and mesial/distal surfaces of both teeth, extending to the deep dentin layer. The lesions are soft, black-brown, with positive probing pain, thermal sensitivity (hot/cold discomfort), and vital pulp response (reactive to pulp vitality testing). No percussion pain or mobility suggests no apical involvement.  - Pulp Status: Reversible pulpitis in both teeth, likely secondary to deep caries. Tooth 14 shows radiographic proximity to the pulp chamber, increasing the risk of pulpal exposure or progression to irreversible pulpitis if untreated. Tooth 15 has deep dentin involvement but is farther from the pulp.  - Overall Diagnosis: Chronic cavitated coronal caries (ICDAS 5-6) on permanent teeth, with reversible pulpitis and no evidence of periapical pathology. This aligns with the guidelines' definition of "cavitated lesions" (surface discontinuity/break, unlikely to reverse without intervention) on coronal surfaces. Risk factors include prolonged duration (2+ years) and occasional thermal sensitivity, but no systemic/infectious history mitigates broader concerns.  - Certainty: High clinical confidence based on history, exam, and radiographs; however, the guidelines rate evidence for nonrestorative treatments on permanent teeth as low to moderate certainty due to indirectness (most data from primary teeth).  No signs of irreversible pulpitis (e.g., spontaneous pain, percussion tenderness) or necrosis, so endodontic intervention (e.g., root canal therapy) is not immediately indicated unless symptoms worsen or pulpal exposure occurs during treatment.  Treatment Plan  Referring to the ADA guidelines (Question 1: Arrest of cavitated coronal lesions on permanent teeth), I recommend prioritizing nonrestorative interventions to arrest the lesions, as they are effective, conservative, and minimize tooth structure loss. The guidelines emphasize lesion-level interventions to reestablish mineralization balance, especially for cavitated lesions.  - Primary Goal: Arrest caries progression, alleviate thermal sensitivity, and preserve pulp vitality without immediate restoration or endodontic therapy.  - Recommended Intervention: Prioritize 38% silver diamine fluoride (SDF) solution applied biannually (every 6 months) over 5% sodium fluoride (NaF) varnish applied once per week for 3 weeks.  - Rationale: Guidelines provide a conditional recommendation (low-certainty evidence) for 38% SDF on permanent coronal surfaces, extrapolated from high/moderate-certainty data in primary teeth showing 1.13-1.45 times greater arrest rates vs. alternatives. SDF is effective for advanced cavitated lesions, non-invasive, and suitable for posterior teeth despite potential technique challenges (e.g., moisture control). It may be more effective on anterior teeth, but data support posterior use. Avoid 10% CPP-ACP (guidelines recommend against it if fluoride options are available).  - Alternative if SDF Not Feasible: 5% NaF varnish (weekly for 3 weeks, then every 3-6 months) if patient prefers to avoid black staining or if isolation is challenging.  - Adjunctive Measures (per guidelines' emphasis on patient-level interventions):  - Oral hygiene reinforcement: Twice-daily brushing with 1,000-1,500 ppm fluoride toothpaste.  - Dietary counseling: Reduce fermentable carbohydrates/sugars to prevent progression.  - Monitoring: Recall every 3-6 months for reassessment (hardness on probing, radiographic arrest).  - When to Escalate: If no arrest after 6-12 months (e.g., persistent pain, radiographic progression), consider restorative options (e.g., indirect pulp capping) or endodontic therapy if pulpitis becomes irreversible. Guidelines note SDF for uncooperative patients or limited access, but this patient seems cooperative.  - Timeline: Initial application today; follow-up at 3 months for evaluation, then biannual.  - Prognosis: Good for arrest (50-70% baseline probability per guidelines, potentially increasing to 79-99% with SDF); monitor for black staining (aesthetic concern, but posterior location minimizes visibility).  This plan aligns with guidelines' focus on effectiveness, safety, feasibility, and patient values (e.g., conservative approach).  Operative Procedure  As an endodontist, I would perform or supervise this nonrestorative procedure, ensuring pulpal protection. Procedure for 38% SDF application (based on guidelines and standard protocols):  1. Preparation (10-15 minutes):  - Obtain informed consent: Discuss benefits (arrest caries, preserve tooth), risks (black staining of lesion, potential metallic taste, gingival irritation, rare allergic reaction), alternatives (NaF varnish, restoration), and that staining is permanent but indicates arrest.  - Isolate teeth 14 and 15 with cotton rolls or rubber dam (preferred for posterior moisture control).  - Gently remove gross debris/soft caries with a spoon excavator (avoid aggressive removal to prevent pulpal exposure, especially in 14).  - Dry the lesions with air (avoid desiccation).  2. Application (5-10 minutes):  - Apply petroleum jelly to surrounding gingiva/lips to prevent irritation.  - Dispense 1 drop of 38% SDF (e.g., Advantage Arrest) onto a microbrush.  - Apply to cavitated areas of 14 and 15, rubbing gently for 1 minute to penetrate dentin.  - Allow to air-dry for 1 minute (no rinsing).  - If desired (per guidelines, optional), apply potassium iodide immediately after to reduce staining (though evidence is low-certainty for root surfaces; may apply here if patient concerned).  3. Completion:  - Remove isolation; check for excess SDF.  - Total time: 20-30 minutes.  - Note: Guidelines emphasize proper technique; hardness on probing post-treatment indicates arrest (not color alone).  If pulpal exposure occurs during debris removal (higher risk in 14), proceed to vital pulp therapy (e.g., partial pulpotomy with mineral trioxide aggregate) as an endodontist.  Postoperative Instructions  - Immediate Care: Avoid eating/drinking for 1 hour to allow SDF to set. Rinse mouth gently with water after.  - Oral Hygiene: Resume normal brushing/flossing immediately, but use soft brush. Continue fluoride toothpaste twice daily.  - Diet: Avoid sugary/acidic foods/drinks for 24 hours; long-term, reduce sugar intake.  - Symptoms to Monitor: Mild gingival irritation or metallic taste may occur (resolves in days). Contact if severe pain, swelling, or persistent sensitivity develops (may indicate progression).  - Follow-Up: Return in 3 months for reassessment (clinical exam, radiograph if needed). Reapply SDF at 6 months.  - Aesthetics: Lesions may blacken (sign of arrest); this is permanent but not harmful. If bothersome, discuss future restoration.  - General: Maintain regular dental visits; inform if symptoms worsen (e.g., for potential endodontic evaluation).  This approach follows the guidelines' evidence-based recommendations while prioritizing pulp preservation. If symptoms suggest irreversible pulpitis, root canal therapy may be needed—reassess promptly.  Disclaimer: Grok is not a doctor; please consult one. Don't share information that can identify you. | Diagnosis  Tooth 14 – Deep dentin caries, approaching pulp chamber but without exposure; tooth is vital (positive sensitivity tests, no irreversible pulpitis signs).  Tooth 15 – Deep dentin caries, vital pulp, no percussion pain, no periapical involvement.  Treatment Plan  1. Treatment Objectives  Preserve pulp vitality.  Remove infected dentin while retaining affected dentin close to pulp (selective caries removal).  Seal with durable, biocompatible restorative material.  Prevent recurrence with fluoride and oral hygiene reinforcement.  2. Restorative Management  Selective caries removal to soft dentin at pulpal floor and firm dentin at periphery to minimize pulp exposure risk.  Apply pulp-protective liner:  Calcium hydroxide or light-cured resin-modified glass ionomer for deep areas.  Definitive restoration:  Composite resin if moisture control is good (aesthetic and durable).  High-viscosity glass ionomer if moisture control is challenging or as a temporary restoration.  3. Operative Procedure (Step-by-Step)  Local anesthesia as needed.  Isolation with rubber dam to ensure a dry field.  Caries removal:  High-speed bur to remove unsupported enamel and bulk of soft dentin.  Slow-speed round bur or hand excavator for careful removal near pulp.  Pulp protection:  Apply a thin layer of calcium hydroxide over deepest dentin if close to pulp horn.  Cover with resin-modified glass ionomer liner.  Etching, bonding, restoration:  Etch enamel/dentin, rinse, dry without desiccation.  Apply bonding agent, light cure.  Incremental composite placement with shade matching, light cure each layer.  Finishing and polishing restoration.  Check occlusion and adjust to avoid premature contacts  4. Postoperative Instructions  Avoid chewing hard foods on the treated side for 24 hours.  Maintain meticulous oral hygiene — brush twice daily with fluoride toothpaste, floss daily.  Use 5% sodium fluoride varnish application (per ADA guidelines) to reduce risk of secondary caries.  Avoid frequent snacking on fermentable carbohydrates.  Report any spontaneous pain or prolonged sensitivity.  5. Follow-up  2–4 weeks: Clinical review for symptom resolution and restoration integrity.  6–12 months: Radiographic evaluation to ensure pulp vitality and absence of secondary caries.  Annual monitoring thereafter.  6. Prognosis  Good, if restoration is well-sealed and patient maintains oral hygiene and preventive measures.  Risk of pulpitis is low but requires monitoring due to proximity to pulp. |
| **Chief Complaint:**  **Black discoloration on the surface of the left upper front tooth for 1 month.**  **History of Present Illness:**  **The patient reported noticing black discoloration on the surface of the left upper front tooth 1 year ago, with no spontaneous pain. The patient presented to our hospital requesting treatment for the affected tooth.**  **Other Information:**  **The patient denied any history of cardiovascular diseases (e.g., hypertension, coronary heart disease), systemic diseases (e.g., diabetes), drug allergies, or infectious diseases.**  **Oral Examination:**  **- Tooth 21: A carious cavity was observed on the mesial, labial, and lingual surfaces. Extensive soft, light-colored decayed tissue extended to the deep dentin.**  **- Tenderness on probing (+).**  **- Pulp sensitivity test: Sensitive to cold and heat.**  **- Electric pulp test: Reactive (response consistent with control tooth).**  **- Percussion test: (-).**  **- Biting pain: (-).**  **- Physiological mobility observed.**  **- No sinus tract detected on the buccal alveolar mucosa.**  **- No periodontal pocket detected.** | Diagnosis:  Deep caries with pulp exposure  Treatment Plan:  Option 1: Restorative treatment (filling)  After detailed communication with the patient regarding the treatment process, outcomes, costs, prognosis, and other relevant aspects of each treatment option, the patient selected Option 1. The patient was informed that the deep caries was close to the pulp, and pulpitis could not be ruled out. The possibility of post-restoration pain was explained. The patient carefully read the written Informed Consent Form and provided signed consent for treatment. The medical records are consistent with the information provided by the patient.  The procedural steps and precautions were explained in detail to the patient. The tooth to be treated was verified by two practitioners through bidirectional confirmation.  Procedure:  Disposable examination kits, disposable triple-function syringe tips, and disposable suction tubes were used. The oral cavity was cleaned. Tooth 21 was shade-matched, and tooth color analysis was performed. Under local anesthesia with articaine and epinephrine, minimally invasive round burs were used with a turbine handpiece to completely remove decayed tissue. Approaching the pulp chamber, pulp exposure was detected (the parent was informed). A minimally invasive cavity was prepared following aesthetic restoration principles. Gingival retraction was achieved with retraction cord. Proximal contouring was performed. The cavity was disinfected and dried. A liner base (LC) was applied for pulp capping. Self-etching adhesive was used, followed by flowable resin as a base. The cavity was restored with nanohybrid composite resin in incremental layers. The contour was adjusted, occlusion was checked, and fine polishing was performed.  Postoperative Instructions:  - Avoid consuming highly pigmented foods and beverages for the next few days.  - Refrain from biting on extremely hot, cold, or hard foods with the treated tooth.  - Maintain rigorous oral hygiene, and flossing is recommended.  - Seek prompt medical attention if pain occurs.  - The parent was informed that pulp capping may fail, and root canal treatment might be necessary in the future.  - Return for follow-up if any discomfort arises. | Diagnosis  Based on clinical examination and guideline descriptions, the diagnosis is:  21: Chronic caries (deep caries)  (ICDAS classification: Cavitated lesion reaching deep dentin, corresponding to ICDAS level 5-6; Pulp status: Reversible pulpitis)  Treatment Plan  According to the American Dental Association (ADA) guidelines (recommendations for non-restorative management of advanced carious lesions in permanent teeth):  Preferred Option: 38% Silver Diamine Fluoride (SDF) Solution (Strong Recommendation)  1. Procedure:  - Operative Steps:  - Isolate the affected tooth (using cotton rolls/rubber dam for saliva control).  - Apply 38% SDF solution to the carious surfaces (mesial, labial, lingual) using a small cotton pellet for 1 minute.  - Rinse with water and thoroughly remove residual liquid with suction.  - Frequency: Reapply at 6-month follow-up (guidelines recommend semi-annual application for optimal efficacy).  - Mechanism of Action:  - Silver ions (antibacterial) + fluoride ions (remineralization) → rapidly arrest caries progression and harden decayed tissue.  2. Applicability Analysis:  - Advantages:  - Highly effective for deep caries control (evidence level: moderate-high), particularly convenient for anterior teeth (guideline note: anterior teeth may respond better than posterior teeth).  - No anesthesia/drilling required, ideal for patients with dental anxiety.  - Side Effects:  - Permanent black staining of the carious area (due to silver deposition; written informed consent required).  - Transient gingival irritation (rare).  Alternative Option (if patient declines black discoloration)  1. 5% Sodium Fluoride Varnish (NaF Varnish) (Conditional Recommendation)  - Procedure: Apply to carious surfaces every 3-6 months (requires higher frequency for sustained efficacy).  - Limitations: Less effective than SDF (evidence level: low), demands long-term patient compliance with follow-ups.  Postoperative Instructions  1. Home Care:  - Toothpaste: Use 5,000 ppm fluoride toothpaste (1.1% NaF) daily (guideline recommendation: equally effective for root caries; applicable to all high-caries-risk patients).  - Diet: Strictly limit sugar intake (especially between-meal snacks) and reduce carbonated beverages.  - Oral Hygiene: Brush twice daily using the Bass method + floss interproximal surfaces of the affected tooth.  2. Follow-Up Monitoring:  - Timeline: Re-evaluate at 3 and 6 months post-SDF treatment; if using fluoride varnish, reassess every 3 months.  - Evaluation Metrics:  - Hardness of the carious cavity (assess with probe to determine caries arrest).  - Color change (black discoloration is normal and indicates inactivity).  - Pulp symptoms (whether pain is resolved).  3. Indications for Restorative Intervention:  - If decayed tissue remains soft/caries expands, or pulp symptoms worsen → proceed with restorative treatment (filling) or root canal therapy.  Key Points for Dentist-Patient Communication  1. Explain the pros and cons of SDF:  - "This treatment effectively stops decay from progressing but will permanently stain the decayed area black. If you accept the aesthetic change, it can avoid drilling."  2. Emphasize compliance:  - "Even if the decay arrests, consistent use of high-fluoride toothpaste and regular check-ups are essential to prevent recurrence."  3. Provide alternatives:  - "If black discoloration is unacceptable, sodium fluoride varnish can be used but requires more frequent visits and is less effective."  --- | Professional Diagnosis  Based on the patient's history, clinical examination, and radiographic findings (assuming standard radiographs were taken, though not explicitly mentioned; if not, recommend bitewing/periapical X-rays for confirmation), and referring to the American Dental Association (ADA) evidence-based clinical practice guidelines on nonrestorative treatments for carious lesions, my diagnosis as an endodontist is as follows:  - Tooth Involved: Permanent maxillary left central incisor (tooth 21).  - Lesion Description: Advanced cavitated carious lesion on the proximal-central, labial, and lingual surfaces, extending to the deep dentin layer. The decay is soft and light-colored, with positive probing pain and thermal sensitivity (cold and hot), vital response to electric pulp testing (EPT), and no percussion or occlusal pain. Physiologic mobility, absence of sinus tracts, and no deep periodontal pockets indicate no apical or periodontal involvement.  - Pulp Status: Reversible pulpitis, likely due to deep caries irritating the pulp. The vitality tests confirm the pulp is responsive, with no signs of irreversible pulpitis (e.g., no spontaneous pain, no prolonged response to stimuli) or necrosis.  - Overall Diagnosis: Chronic cavitated coronal caries (ICDAS 5-6) on a permanent anterior tooth, with reversible pulpitis and no periapical pathology. This matches the guidelines' definition of "cavitated lesions" (surface break/discontinuity, less likely to reverse without intervention) on facial/lingual and approximal surfaces. The 1-year history of darkening suggests chronic progression, but the recent 1-month complaint may indicate acceleration. No systemic factors complicate management.  - Certainty: High clinical confidence; guidelines rate evidence for nonrestorative treatments on permanent coronal cavitated lesions as low certainty (indirectness from primary tooth data), but support conservative approaches to arrest progression and preserve vitality.  No indication for immediate endodontic therapy (e.g., root canal) unless pulpal exposure occurs or symptoms progress to irreversible pulpitis.  Treatment Plan  Referring to the ADA guidelines (Question 1: Arrest of cavitated coronal lesions on permanent teeth; Question 2: Noncavitated lesions, but adapted for cavitated; remarks on anterior teeth and aesthetics), I recommend prioritizing nonrestorative interventions to arrest the lesion, as they are effective for cavitated coronal lesions, conservative, and align with minimizing tooth loss. However, given the anterior location, aesthetic concerns (e.g., staining) must be addressed via informed consent.  - Primary Goal: Arrest caries, relieve sensitivity, preserve pulp vitality, and maintain aesthetics without immediate restoration or endodontics.  - Recommended Intervention: Prioritize 38% silver diamine fluoride (SDF) solution applied biannually (every 6 months) over 5% sodium fluoride (NaF) varnish applied once per week for 3 weeks.  - Rationale: Guidelines suggest (conditional recommendation, low-certainty evidence) 38% SDF for cavitated coronal lesions on permanent teeth, based on moderate/high-certainty data from primary teeth showing 1.13-1.45 times greater arrest rates vs. alternatives. SDF is non-invasive, effective for anterior teeth (guidelines note potentially higher efficacy anteriorly due to easier access/cleaning), and suitable for vital, sensitive pulps. Avoid 10% CPP-ACP (guidelines recommend against if fluoride options available). For facial/lingual surfaces (Question 2), 5% NaF varnish or 1.23% APF gel are alternatives, but SDF is prioritized for cavitated lesions.  - Alternative if SDF Declined (e.g., Due to Staining): 5% NaF varnish (weekly for 3 weeks, then every 3-6 months) or resin infiltration (if approximal involvement dominant; low-certainty evidence). If no arrest, escalate to restorative (e.g., composite filling with indirect pulp cap) or monitor for endodontic needs.  - Adjunctive Measures (per guidelines' patient-level focus):  - Oral hygiene: Twice-daily brushing with 1,000-1,500 ppm fluoride toothpaste; interdental cleaning.  - Dietary counseling: Reduce sugars/carbohydrates to rebalance mineralization.  - Monitoring: Recall every 3 months initially (hardness on probing indicates arrest; not color alone).  - When to Escalate: If persistent symptoms, radiographic progression, or pulpal exposure, consider vital pulp therapy (e.g., pulpotomy) or root canal therapy. Guidelines support SDF for less invasive alternatives.  - Timeline: Initial application today; follow-up at 3 months, then biannual.  - Prognosis: Favorable for arrest (50-70% baseline per guidelines, up to 65-99% with SDF); anterior location aids compliance, but staining may affect satisfaction.  This plan emphasizes guidelines' priorities: effectiveness, safety, feasibility, and patient preferences (e.g., discuss staining).  Operative Procedure  As an endodontist, I would perform/supervise this, focusing on pulpal protection. Procedure for 38% SDF (based on guidelines and protocols):  1. Preparation (10-15 minutes):  - Informed consent: Explain benefits (arrest caries, preserve tooth/vitality), risks (permanent black staining of lesion, metallic taste, gingival irritation, rare allergy), alternatives (NaF varnish, restoration), and that staining indicates arrest but may be visible anteriorly.  - Isolate tooth 21 with cotton rolls (rubber dam if possible for moisture control).  - Gently remove gross soft decay with spoon excavator (avoid deep excavation to prevent exposure; light-colored decay suggests active lesion).  - Dry cavity with air.  2. Application (5-10 minutes):  - Apply petroleum jelly to lips/gingiva for protection.  - Dispense 1 drop 38% SDF (e.g., Riva Star or Advantage Arrest) on microbrush.  - Apply to cavity (proximal, labial, lingual), rub for 1 minute.  - Air-dry 1 minute (no rinse).  - Optional: Apply potassium iodide post-SDF to minimize staining (guidelines note for roots, but useful aesthetically here; very low certainty).  3. Completion:  - Remove isolation; check excess.  - Total time: 20-30 minutes.  - Note: If exposure during removal, proceed to vital pulp therapy (e.g., MTA placement).  Postoperative Instructions  - Immediate Care: Avoid eating/drinking 1 hour. Rinse gently after.  - Oral Hygiene: Resume brushing/flossing immediately; use fluoride toothpaste.  - Diet: Avoid sugars/acids 24 hours; reduce long-term.  - Symptoms: Expect mild irritation/taste (resolves days). Contact if pain worsens, swelling, or sensitivity persists (may need re-evaluation).  - Follow-Up: Return 3 months for exam (probe hardness, possible radiograph). Reapply SDF at 6 months.  - Aesthetics: Lesion may darken/blacken permanently; if unacceptable, discuss future cosmetic restoration.  - General: Regular visits; report changes for potential endodontic assessment.  Disclaimer: Grok is not a doctor; please consult one. Don't share information that can identify you. | Diagnosis  Tooth 21 (Maxillary left central incisor) – Extensive dentin caries involving proximal, labial, and lingual surfaces, pulp still vital (positive cold, heat, and electric pulp tests), no periapical or periodontal involvement.  Classification: Deep dentin caries without pulp exposure (vital pulp therapy candidate).  Treatment Plan  Objectives  Preserve pulp vitality.  Completely remove infected dentin from cavity margins while preserving affected dentin over pulp horn (selective caries removal).  Restore tooth function, esthetics, and prevent recurrence.  Operative Procedure  1. Preparation  Obtain informed consent (explain risks of possible pulp exposure).  Apply local anesthesia if needed.  Isolate tooth with rubber dam for moisture control.  2. Caries Removal  Remove unsupported enamel and infected dentin at peripheral margins using high-speed bur with water cooling.  Near pulp: perform selective removal to soft dentin to avoid exposure.  Disinfect cavity with chlorhexidine solution.  3. Pulp Protection  Apply calcium hydroxide liner over the deepest dentin areas close to pulp.  Cover liner with resin-modified glass ionomer base to provide seal and fluoride release.  4. Restoration  For esthetics: use nanohybrid composite resin with shade matching.  Apply enamel bevel for improved bonding/blending.  Etch enamel/dentin, apply adhesive system, light cure.  Place composite incrementally, curing each layer.  Finish and polish restoration to restore tooth contour and luster.  Postoperative Instructions  Avoid biting hard objects on restored tooth for 24 hours.  Maintain excellent oral hygiene — fluoride toothpaste twice daily, flossing once daily.  Reduce intake of sugary and acidic foods/drinks.  Expect mild transient sensitivity to temperature for a few days; report if sensitivity persists >2 weeks or if spontaneous pain develops.  Follow-up  Re-examination at 2–4 weeks for symptom check and restoration evaluation.  Annual radiographs to monitor pulp status and restoration margins.  Apply fluoride varnish at recall visits to reduce secondary caries risk.  Prognosis  Good — high chance of maintaining vitality if sealing is effective and oral hygiene is maintained. |
| Chief Complaint:  Recurrent swelling and pain in the right lower posterior tooth for 1 month.  History of Present Illness:  The patient reported experiencing pain in the right lower posterior tooth after biting on a hard object six months ago. One month ago, the affected tooth began to exhibit recurrent swelling and pain. The patient stated that periodontal treatment was performed at an external dental clinic, and they self-administered "anti-inflammatory and pain-relief medication," but the symptoms did not resolve. The patient presented to our hospital requesting further treatment.  Other Information:  The patient denied any history of cardiovascular diseases (e.g., hypertension, coronary heart disease), systemic diseases (e.g., diabetes), drug allergies, or infectious diseases.  Oral Examination:  - Tooth 43: The tooth structure appears intact.  - Pulp sensitivity test: No response to cold or heat.  - Electric pulp test: No response (control tooth 42 responded at 12).  - Percussion test: ++ (painful).  - Biting pain: +.  - Mobility: Present.  - No sinus tract detected on the buccal alveolar mucosa.  - Mild congestion and swelling observed on the buccal gingiva of tooth 43.  - Pain on palpation, and periodontal pocket detected upon probing.  - Tooth 44: Missing.  - Tooth 45: Porcelain-fused-to-metal crown observed.  - Tooth 46: Large restoration observed.  - Teeth 45 and 46:  - Probing: (-).  - Cold test: (-).  - Percussion test: (-).  - Gingiva mildly red and swollen.  - No fistula detected.  - No pain on palpation.  - No mobility.  Auxiliary Examination:  Panoramic radiograph taken on July 8, 2025, revealed:  - Tooth 43: Widened periodontal ligament space and a radiolucent area at the apex.  - Teeth 45 and 46: Incompletely obturated root canals with radiolucent areas at the apices. | Treatment Plan:  Option 1: Root canal treatment (RCT) + inlay restoration for tooth 43  Option 2: Treatment at a later date  After detailed communication with the patient regarding the treatment process, outcomes, costs, prognosis, and other relevant aspects of each treatment option, the patient selected Option 1. The difficulty level of the root canal treatment was assessed as Grade III. The patient was informed about potential complications during RCT, including instrument separation, lateral perforation, furcal perforation, canal obstruction, and treatment failure. The patient carefully read the written Informed Consent Form and provided signed consent for treatment. The medical records are consistent with the information provided by the patient. The patient was also advised that periapical radiolucencies were observed in teeth 45 and 46, and if symptoms develop in the future, root canal retreatment or apical surgery is recommended.  Procedure:  The procedural steps and precautions were explained in detail to the patient. The tooth to be treated was verified by two practitioners through bidirectional confirmation.  Disposable examination kits, disposable triple-function syringe tips, and disposable suction tubes were used. The oral cavity was cleaned and disinfected. Under local anesthesia with articaine and epinephrine, an access cavity was prepared on the lingual surface of tooth 43. The entire pulp chamber roof was removed. Ultrasonic instrumentation was used to thoroughly remove calcified tissue from the pulp chamber and canal orifices. The pulp chamber floor was intact. The orifice of one calcified canal was located using a DG16 explorer. Pulp extirpation was performed, and the canal was negotiated with a 10 C-file. The working length was determined as 26 mm using an electronic apex locator. The canal was cleaned and shaped to size 25/0.06 taper using a WaveOne Gold nickel-titanium rotary system with EDTA lubrication. A double-sided open-ended irrigation needle was used to alternately irrigate the canal with 1% sodium hypochlorite and normal saline. Ultrasonic activation was applied. The canal was dried and medicated with a CP (camphorated phenol) cotton pellet. The access cavity was temporarily sealed with glass ionomer cement.  Postoperative Instructions:  - Return for follow-up in 1 week.  - Continue systemic anti-inflammatory medication as prescribed.  - Return promptly if any discomfort occurs.  - Avoid chewing on the treated side. | Diagnosis  1. Tooth 43: Chronic Apical Periodontitis with Acute Exacerbation  - Basis:  - Pulp necrosis (no response to cold/heat/electric tests).  - Percussion pain (++), biting pain (+), mobility.  - Periapical radiolucency (X-ray shows widened periodontal ligament space and apical radiolucency).  - Gingival swelling (sign of acute infection).  2. Tooth 43: Combined Periodontal-Endodontic Lesion (Possible)  - Basis:  - Probing reveals periodontal pockets + gingival redness and swelling.  - Pulp necrosis with apical infection potentially involving periodontal tissues.  3. Teeth 45, 46: Failed Root Canal Treatment  - Basis:  - X-ray shows inadequate root canal filling density + periapical radiolucency (indicating uncontrolled apical infection).  Treatment Plan  Core Principles  - Tooth 43 requires immediate infection control: Acute apical periodontitis necessitates drainage and pus evacuation, followed by root canal treatment (RCT) after infection subsides.  - Teeth 45, 46 require retreatment evaluation: Persistent apical lesions indicate ongoing infection, requiring removal of existing restorations and root canal retreatment (Re-RCT) or apical surgery.  Staged Treatment for Tooth 43  Phase 1: Emergency Management (Immediate)  1. Goal: Alleviate acute symptoms and control infection.  2. Procedure:  - Incision and drainage (if fluctuant abscess is present):  - Incise the swollen buccal sulcus under local anesthesia and place a rubber drain.  - Pulp chamber drainage:  - Access the pulp chamber under local anesthesia, remove the roof, extract necrotic pulp, and negotiate root canals.  - Irrigation: Alternate irrigation with 3% hydrogen peroxide and normal saline. Leave the canal open for drainage for 2-3 days.  - Medication:  - Oral Amoxicillin-Clavulanate Potassium (625mg tid × 5 days) + Ibuprofen (400mg prn for pain relief).  Phase 2: Root Canal Treatment (After Symptom Resolution)  1. Procedure:  - Root canal preparation:  - Clean canals with nickel-titanium instruments (e.g., ProTaper). Determine working length (X-ray + apex locator).  - Irrigation: 17% EDTA + 2.5% sodium hypochlorite with ultrasonic activation.  - Root canal disinfection:  - Place calcium hydroxide paste in canals for 1-2 weeks.  - Root canal obturation:  - Warm vertical condensation technique (e.g., System B) + epoxy resin-based sealer (e.g., AH Plus).  - Restoration plan:  - Fiber post and core + full crown restoration (to prevent tooth fracture).  Special Considerations  - If periodontal pocket depth ≥5mm:  - Perform periodontal baseline therapy (scaling and root planing) after RCT. Evaluate need for periodontal surgery.  - If apical lesion persists (re-evaluate after 6 months):  - Consider apical surgery (microscopic apicoectomy + MTA retrofill).  Treatment Plan for Teeth 45, 46  1. Remove porcelain crown/filling to assess tooth condition.  2. Root canal retreatment (Re-RCT):  - Remove existing filling material, negotiate calcified canals (using microscopic ultrasonic techniques), disinfect thoroughly, and re-obturate.  3. If apical lesion persists:  - Prioritize microscopic apical surgery (prognosis for single-rooted tooth 45 is favorable).  Postoperative Instructions  1. After emergency treatment for Tooth 43:  - Medication: Complete antibiotic course; use pain relievers as needed.  - Oral hygiene: Rinse with 0.12% chlorhexidine solution (twice daily × 1 week). Avoid chewing on the affected side.  - Follow-up: Revisit in 2 days. If exudate reduces, proceed with canal disinfection.  2. After RCT:  - During temporary restoration: Avoid biting hard foods. Place permanent crown within 1 week.  - Review: Take X-rays at 6 months and 1 year to assess apical healing (bone density recovery).  3. Before retreatment for Teeth 45, 46:  - Temporary protection: Use temporary sealing material to prevent microleakage.  Guideline Basis and Clinical Rationale  1. RCT as first choice for apical periodontitis:  - Guidelines emphasize source control (canal debridement > antibiotics).  2. Pulp necrosis with periodontal pockets:  - Prioritize RCT to control pulpal infection before evaluating periodontal needs (avoid unnecessary periodontal surgery).  3. Indications for retreatment:  - Apical lesion + inadequate root filling → Retreatment mandatory (guidelines: persistent apical lesions require intervention).  > Key Technical Standards:  > - Root canal irrigation: Sodium hypochlorite ≥2.5% + final ultrasonic activation (enhances disinfection).  > - Obturation criteria: Dense filling to working length, no over/under-filling (verify with X-ray).  Recommendation: Prioritize RCT for Tooth 43. Address Teeth 45/46 stepwise, emphasizing minimally invasive RCT and standardized restoration to preserve teeth. | Professional Diagnosis  Based on the patient's history, clinical examination, and ancillary tests (surface tomography dated July 08, 2025), I have formulated the following diagnosis as an endodontist. The guidelines from the American Dental Association (ADA) on nonrestorative treatments for carious lesions were reviewed, but they primarily address the arrest or reversal of noncavitated and cavitated carious lesions (e.g., via fluoride applications, sealants, or silver diamine fluoride [SDF] for advanced cavitated coronal or root lesions). This case appears to involve pulpal and periapical pathology rather than active surface caries, as tooth 43 is described as intact with no mention of visible carious lesions. The symptoms (recurrent swelling, pain on percussion and occlusion, nonvital pulp tests) suggest pulpal necrosis likely secondary to trauma from biting a hard object 6 months ago, leading to bacterial invasion and infection. The guidelines are not directly applicable for pulpal necrosis or periapical abscess, as these require endodontic intervention to address the infected pulp space rather than surface arrest. However, if subtle root surface caries were present (not explicitly noted), the guidelines recommend prioritizing high-concentration fluoride (e.g., 5,000 ppm toothpaste) for root lesions.  - Tooth 43 (Mandibular Right Canine): Necrotic pulp with symptomatic apical periodontitis. This is supported by:  - Negative responses to cold, hot, and electric pulp vitality tests (control tooth 42 responsive).  - Percussion pain (++), occlusal pain (+), and mild buccal gingival congestion/swelling.  - Radiographic findings: Periapical membrane widening with hypodense (radiolucent) area at the root apex, indicating periapical inflammation/infection.  - History of trauma (biting hard object) followed by recurrent swelling/pain unresponsive to periodontal treatment and antibiotics/analgesics.  - No visible cavitation or sinus tract, but possible mild mobility (not quantified in exam).  - Teeth 45 and 46 (Mandibular Right Second Premolar and First Molar): Previously root canal-treated teeth with asymptomatic apical periodontitis. This is supported by:  - Undense (inadequate) root canal fillings with hypodense areas at the root apices on radiography, suggesting persistent or recurrent infection.  - Negative cold test (expected post-RCT), no percussion pain, no probing depths, mild gingival erythema/swelling but no fistula or palpation pain.  - Asymptomatic currently, but at risk for future flare-ups.  - Tooth 44: Missing (noted in exam), which may contribute to occlusal overload on adjacent teeth.  - Differential Diagnosis: Chronic apical abscess (if drainage were present, though no sinus tract noted); cracked tooth syndrome (from trauma history); or combined endodontic-periodontal lesion (given recent periodontal treatment). No evidence of systemic involvement or allergies.  Note: The complaint specifies "lower right posterior tooth," but the exam focuses on tooth 43 (canine, which is anterior). This may be a documentation discrepancy; if symptoms are truly posterior, they could originate from 45/46. Further clarification (e.g., repeat exam or CBCT) is advised if needed.  Treatment Plan  The primary goal is to eliminate infection, relieve symptoms, and preserve the tooth. Nonrestorative approaches from the ADA guidelines (e.g., SDF for advanced cavitated coronal lesions or high-fluoride toothpaste for root lesions) are not indicated for pulpal necrosis, as they do not address intracanal infection. Instead, conventional endodontic therapy is required for tooth 43. For teeth 45/46, monitor asymptomatically per guidelines (active surveillance for nonprogressive lesions). If root surface caries develops in the future (e.g., on exposed roots), prioritize 5,000 ppm fluoride toothpaste (daily) over varnish or SDF, as per guideline recommendations for root lesions (low-certainty evidence, conditional).  1. Immediate Management (Today):  - Local anesthesia and emergency access/pulpectomy for tooth 43 to relieve pressure and initiate disinfection.  - Prescribe antibiotics if systemic signs (e.g., fever) emerge, but not routinely (evidence shows limited benefit for localized infection).  - Analgesics for pain control.  2. Definitive Treatment:  - Tooth 43: Nonsurgical root canal therapy (RCT). Strong recommendation based on pulpal necrosis and symptoms; success rate ~90-95% for vital/nonvital cases.  - Teeth 45/46: Monitor radiographically/clinically every 6-12 months. If symptoms develop or lesions enlarge, consider nonsurgical retreatment or apicoectomy. No immediate intervention needed (asymptomatic).  - Preventive Measures (Referencing ADA Guidelines): To prevent caries progression on other teeth or root surfaces:  - Recommend 5,000 ppm fluoride toothpaste (1.1% NaF) daily for at-home use, prioritizing this over varnish for any potential root exposure (guideline: low-certainty, conditional for root lesions).  - If noncavitated coronal caries noted elsewhere (not in this exam), prioritize sealants + 5% NaF varnish (every 3-6 months) on occlusal surfaces (moderate-certainty, strong recommendation).  - Avoid CPP-ACP products as substitutes for fluoride (guideline: low-certainty, conditional against use).  3. Alternatives:  - If patient prefers minimally invasive: SDF (38% biannual) could be considered if a cavitated coronal lesion were present (guideline: moderate-certainty, strong for primary teeth; conditional for permanent), but not applicable here as tooth is intact.  - Extraction if RCT fails or patient declines (last resort).  - Referral to periodontist if combined endo-perio suspected.  4. Prognosis: Good for tooth 43 post-RCT (85-95% success). Guarded for 45/46 due to poor existing fillings; monitor for healing.  5. Follow-up: Recall in 1 week for completion, then 6 months for radiographic review.  Procedure for Root Canal Therapy (Tooth 43)  Performed under aseptic conditions with rubber dam isolation. Total visits: 1-2 (single-visit if no exudate; multi-visit if infection persists).  1. Preoperative:  - Informed consent: Discuss risks (e.g., pain, swelling, failure ~5-10%, need for crown post-RCT), benefits (pain relief, tooth preservation), alternatives (extraction), and costs.  - Anesthesia: Inferior alveolar nerve block + buccal infiltration (2% lidocaine with 1:100,000 epinephrine).  - Isolate with rubber dam.  2. Access and Pulpectomy:  - Access cavity through occlusal/lingual surface to pulp chamber.  - Extirpate necrotic pulp; irrigate with 3-5% sodium hypochlorite (NaOCl) to disinfect.  - Determine working length with apex locator and radiograph.  3. Instrumentation and Disinfection:  - Biomechanical preparation: Rotary NiTi files to shape canals (e.g., ProTaper system), enlarging to ISO 35-40 at apex.  - Copious irrigation: NaOCl + 17% EDTA (for smear layer removal).  - If multi-visit: Place calcium hydroxide intracanal medicament; temporary seal.  4. Obturation:  - Dry canals; obturate with gutta-percha and sealer (e.g., AH Plus) using lateral/warm vertical condensation.  - Seal access with composite or temporary filling if crown planned.  5. Postoperative Radiograph: Confirm fill quality.  6. Restoration: Recommend full-coverage crown within 1-3 months to prevent fracture (intact now, but weakened post-RCT).  Duration: 45-90 minutes per visit. Asepsis critical to prevent reinfection.  Postoperative Instructions  - Pain Management: Expect mild soreness 1-3 days; take ibuprofen 400-600 mg every 6 hours as needed (max 2,400 mg/day). If severe pain/swelling, contact immediately (possible flare-up ~5-10%).  - Swelling: Apply ice pack 15 min on/off for first 24 hours if swelling persists.  - Diet: Soft foods for 24-48 hours; avoid chewing on treated side until numbness resolves and permanent restoration placed.  - Oral Hygiene: Brush/floss normally; rinse with warm saltwater (1 tsp salt in 8 oz water) 2-3x/day starting day 2.  - Medications: No routine antibiotics unless signs of spreading infection (fever, lymph node swelling). If prescribed, complete course (e.g., amoxicillin 500 mg every 8 hours for 5-7 days).  - Warnings: Avoid hard foods to prevent fracture. If temporary filling dislodges, return promptly.  - Follow-up: Return in 1 week if multi-visit; otherwise, 6 months for recall radiograph to assess healing (periapical lesion resolution expected in 6-12 months).  - Preventive Advice (Per ADA Guidelines): Use 5,000 ppm fluoride toothpaste daily to prevent root caries on exposed surfaces (e.g., if recession worsens). Schedule regular cleanings; reduce sugar intake for overall caries prevention.  If symptoms worsen or new issues arise, contact the clinic immediately. This plan aligns with evidence-based endodontics while referencing the provided guidelines for preventive/caries aspects.  _Disclaimer: Grok is not a doctor; please consult one. Don't share information that can identify you._ | Based on your case and the guideline you uploaded, here’s a professional **diagnosis, treatment plan, procedure, and postoperative instructions** as an endodontist:  ****Diagnosis****  Tooth **43 (lower right canine)**:  Non-vital pulp (no response to cold, heat, or EPT; control tooth 42 normal).  Symptomatic apical periodontitis (percussion +, occlusal pain +, mild gingival swelling, radiographic periapical radiolucency).  Tooth **45, 46**:  Previous endodontic treatment with periapical radiolucency → **chronic periapical periodontitis** (possible endodontic failure).  **Treatment Plan**  **Tooth 43**  Root canal treatment (RCT) indicated.  If prognosis poor (root fracture, extensive bone loss), consider extraction + implant/prosthetic replacement.  **Tooth 45, 46**  Evaluate quality of prior RCT. If underfilled or with missed canals → recommend **non-surgical retreatment**.  If retreatment unlikely to succeed → **apical surgery (apicoectomy + retrograde filling)** may be considered.  Supportive therapy  Manage acute symptoms with analgesics and local debridement if abscess develops.  Oral hygiene reinforcement and fluoride regimen (per ADA guideline, NaF varnish / toothpaste to prevent secondary caries). ****Procedure (Tooth 43 RCT Example)**** Local anesthesia + rubber dam isolation.  Access cavity preparation  Working length determination (apex locator + radiograph).  Cleaning and shaping with rotary NiTi files; irrigation with NaOCl + EDTA.  Intracanal medicament (Ca(OH)₂) for 1–2 weeks if exudate/infection present.  Obturation with gutta-percha + sealer (warm vertical compaction preferred).  Final restoration (composite/post + crown depending on tooth structure). ****Postoperative Instructions**** Mild discomfort is normal for 2–3 days; analgesics as needed.  Avoid biting hard foods on treated tooth until definitive restoration.  Maintain meticulous oral hygiene and fluoride use (5,000 ppm NaF toothpaste if high risk).  Recall at 3–6 months: periapical radiograph to assess healing.  Long-term: annual checkups with periapical monitoring.  ✅ This plan integrates **endodontic standards of care** with **evidence-based caries management recommendations** from the ADA guideline (fluoride therapy, non-restorative prevention for adjacent teeth).  Would you like me to also provide a **stepwise flowchart** (diagnosis → decision tree → treatment options) that you could use as a chairside guide for similar periapical cases? |
| Case: Chronic Pulpitis  Chief Complaint: Occasional pain in the right lower posterior tooth for over six months.  Present Illness: One month ago, the right lower posterior tooth underwent restorative treatment at our hospital. Subsequently, the patient experienced discomfort to cold and heat stimuli. An emergency pulpotomy was performed at a local hospital. The patient now presents to our hospital for further treatment.  Past Medical History: No systemic or infectious diseases were reported.  Examination: Tooth 47 shows an open pulp chamber. Tenderness on probing (+). No response to thermal pulp testing. Positive response to electric pulp testing. Percussion tenderness (+). Grade I tooth mobility. Mild gingival congestion.  Radiographic Findings (X-ray): Tooth 47 shows an opened pulp chamber with widening of the periodontal ligament space around the apex. | Diagnosis: Chronic pulpitis in tooth 47  Treatment Plan: Root canal therapy for tooth 47  Doctor-Patient Communication Record:  The patient was informed about the root canal treatment plan, cost, risks, treatment duration, and the necessity of subsequent restoration. The patient carefully read the root canal treatment informed consent form, provided consent, and signed the document.  Procedure:  The oral cavity was disinfected, and local anesthesia was administered. Under rubber dam isolation, the entire pulp chamber roof was removed. With microscope assistance, two canal orifices were identified using a DG16 explorer. The root canals were negotiated with a 10 K-file. Working length was determined using Root-ZX electronic apex locator, measured as M = D = 18.5 mm. Canal preparation was performed with nickel-titanium instruments up to size 25/06 using EDTA lubrication. Irrigation was alternated between 1% sodium hypochlorite and 0.9% normal saline. Final rinse was performed with P5 ultrasonic activation. Canals were dried, and calcium hydroxide paste was placed as an intracanal medicament. The cavity was temporarily sealed with glass ionomer.  Postoperative Instructions:  Schedule a follow-up appointment in one week. General precautions were advised. The patient was instructed to contact the clinic if any changes occur. The treatment prognosis and potential complications were thoroughly explained. | Chief Complaint:  Lower right posterior tooth (tooth 47) experiencing intermittent pain for over six months - suggestive of a history of chronic pulpitis.  History of Present Illness:  One month ago, after a filling procedure, the tooth developed sensitivity to cold and heat - suggesting the filling may have acted as an irritant, triggering an acute exacerbation of underlying chronic pulpitis, or the procedure itself caused irreversible irritation to the pulp.  Emergency treatment (pulpotomy for drainage and decompression) was performed at a local dental clinic.  The patient now presents to our hospital seeking definitive treatment.  Clinical Examination:  - Tooth 47: Pulp chamber is open (indicating previous pulpotomy).  - Tenderness on probing (+) - suggests inflammation or sensitivity in the radicular pulp or periapical tissues.  - Pulp sensitivity test: No response to cold or heat - typically indicates pulp necrosis. However, considering the history (post-pulpotomy) and the electric pulp test result, it is more likely that the pulp tissue has been partially or completely removed/deactivated, with any residual pulp tissue losing vitality.  - Electric pulp test: A response was noted - this result requires cautious interpretation. The accuracy of electric pulp testing is significantly reduced in a tooth with an open pulp chamber. The probe might contact residual nerve fibers within the root canal, periodontal ligament tissue, or gingiva, leading to a false positive. It cannot be used to confirm pulp vitality. Combined with the lack of response to thermal tests, tenderness on probing (+), and radiographic findings, this supports a diagnosis of pulp necrosis or severely irreversibly inflamed residual pulp.  - Percussion test: (+) - a key positive sign! Clearly indicates inflammatory response in the periapical tissues (apical periodontitis).  - Grade I mobility - supports the presence of periapical inflammation.  - Mild gingival congestion - may be related to periapical inflammatory exudate or irritation from the open pulp chamber.  - Radiographic Examination (X-ray):  - Tooth 47 pulp chamber is open - confirms clinical finding.  - Widened periodontal ligament space at the apex - key radiographic evidence! Clearly indicates chronic inflammation in the periapical tissues (chronic apical periodontitis).  Comprehensive Diagnosis:  1. Tooth 47: Chronic Apical Periodontitis (Primary current diagnosis)  Secondary to: History of Chronic Pulpitis  Basis for Diagnosis:  - History of chronic pulpitis (intermittent pain for over six months).  - Status post pulpotomy.  - Tenderness on probing (+).  - No response to thermal tests (supports pulp necrosis/deactivation).  - Percussion pain (+).  - Grade I tooth mobility.  - Radiographic evidence of widened periapical periodontal ligament space.  Treatment Plan:  1. Core Treatment: Tooth 47 Root Canal Treatment (RCT)  Necessity: This is the standard and most effective treatment for pulp necrosis and chronic apical periodontitis. The goal is to thoroughly remove the source of infection (necrotic pulp, bacteria, and their metabolites) from the root canal system, provide a tight seal with obturation to prevent re-infection, and promote healing of the periapical lesion.  2. Treatment Steps (Procedure):  Step 1: Preoperative Preparation  - Reconfirm history, examination findings, and diagnosis.  - Obtain signed informed consent for RCT (detailed explanation of risks, prognosis, costs, need for subsequent restoration, etc.).  - Take a preoperative periapical radiograph (if previous X-ray is unclear or more precise measurement is needed, consider taking a diagnostic file/cone fit X-ray).  - Rubber dam isolation - Crucial! Provides an aseptic operating field, prevents salivary contamination, prevents accidental ingestion/aspiration of instruments, and protects the patient.  Step 2: Access Cavity Preparation and Canal Exploration  - Clean the access cavity, remove temporary filling material, caries, and residual pulp tissue from the pulp chamber.  - Locate canal orifices, preliminarily determine the number, position, and curvature of root canals (Tooth 47 typically has 3-4 canals: mesiobuccal, mesiolingual, distobuccal, distolingual; variations are common).  Step 3: Working Length Determination  - Use an Electronic Apex Locator (EAL) combined with a radiograph (diagnostic file X-ray) to precisely determine the working length of each canal (from a coronal reference point to the apical constriction).  Step 4: Root Canal Preparation (Cleaning & Shaping)  - Use manual K-files, H-files, and/or rotary nickel-titanium instruments (e.g., ProTaper Next, WaveOne Gold) for canal cleaning and shaping.  - Core Goals: Thoroughly remove infected dentin, necrotic tissue, and microorganisms from the canal walls; create a taper conducive to irrigation and obturation.  - Copious, effective irrigation: Alternate using irrigation solutions like Sodium Hypochlorite (NaOCl, common concentrations 2.5%-5.25%), EDTA, and normal saline. NaOCl dissolves organic matter and disinfects; EDTA removes the smear layer. Ultrasonic activation of irrigants significantly enhances efficacy.  - Strictly control working length during preparation to avoid instrumenting beyond the apical foramen and damaging periapical tissues (over-instrumentation).  Step 5: Root Canal Disinfection & Interim Medication (Usually Required)  - After drying the prepared canals, place an intracanal medicament. Calcium Hydroxide (Ca(OH)₂) paste is commonly used.  - Purpose of medication: Further eliminate residual microorganisms, especially in complex areas of the root canal system; dissolve residual tissue; induce hard tissue formation; reduce the risk of postoperative flare-ups.  - Seal the access cavity tightly with a reliable temporary restorative material (e.g., Cavit, IRM).  - Schedule a follow-up appointment in 1-2 weeks.  Step 6: Root Canal Obturation  - At the follow-up, proceed if the patient is asymptomatic and clinical examination shows no significant signs (no or slight percussion pain, no swelling), and the canals are clean, dry, and odor-free.  - Remove the temporary filling and Ca(OH)₂ paste. Irrigate and dry the canals.  - Select master gutta-percha cones, perform a trial fit, and take a master cone X-ray to confirm appropriate length and taper.  - Obturate the root canal system tightly using cold lateral compaction or (preferably) warm vertical compaction techniques alongside a root canal sealer (e.g., epoxy resin-based like AH Plus).  - Take a postoperative X-ray to assess the quality of the obturation (length, density, taper).  - Seal the access cavity tightly.  Step 7: Final Restoration (Essential!)  - Emphasis: Teeth become more brittle after RCT and are highly prone to fracture. The access cavity itself also compromises tooth structure. Strongly recommend proceeding with definitive coronal restoration ASAP (within weeks) after completing RCT!  - First Choice: Full Crown restoration (e.g., gold alloy crown, Porcelain-Fused-to-Metal crown PFM, all-ceramic crown) - provides the best protection and fracture resistance, restores function and aesthetics.  - Interim/Less Protective Option: Onlay or reinforced composite resin/glass ionomer restoration - only suitable if sufficient tooth structure remains and occlusal forces are not excessive. However, long-term protection is far inferior to a full crown.  Postoperative Instructions:  1. Inform about Postoperative Reaction:  - Mild dull ache, biting discomfort, or slight gingival swelling may occur for 2-3 days after treatment; this is a normal postoperative response.  - Avoid chewing hard foods on the treated tooth.  - Pain usually subsides spontaneously or with over-the-counter pain relievers (e.g., Ibuprofen, Acetaminophen).  2. Medication Guidance:  - Prophylactic antibiotics are usually not required.  - For significant pain, take OTC pain medication as directed (e.g., Ibuprofen 200-400mg every 6-8 hours; or Acetaminophen 500mg every 6 hours).  - Contact the clinic or seek immediate care if severe pain, significant swelling, throbbing pain, fever, or limited mouth opening occurs! This could signal an acute apical abscess or other complications.  3. Oral Hygiene:  - Maintain good oral hygiene; gentle brushing and rinsing can be done on the day of treatment.  - Avoid vigorous brushing on the treated side temporarily, but keep the area clean.  4. Dietary Advice:  - Wait until the temporary filling has fully set (usually 1-2 hours) before eating.  - Avoid very hot or cold foods and drinks on the day of treatment.  - Until the final crown is placed, absolutely avoid chewing hard foods, sticky foods (e.g., rice cakes, gum), or biting (e.g., bones, nuts, ice) with this tooth to prevent fracture!  5. Follow-up Schedule:  - Return for scheduled appointments (typically root canal obturation 1-2 weeks after medication placement).  - After RCT and final crown placement, recall exams are recommended at 6 months and 1 year, with X-rays to assess periapical healing. Thereafter, regular dental check-ups as needed.  6. Re-emphasize Final Restoration:  - Reiterate: The long-term success of RCT critically depends on a good coronal seal and protective restoration. It is imperative to proceed with the final crown restoration promptly (usually within 2-4 weeks) after completing RCT. Delaying restoration can lead to microleakage, re-infection, or tooth fracture, resulting in treatment failure and potentially necessitating extraction.  Summary:  The patient's tooth 47 is diagnosed with Chronic Apical Periodontitis (secondary to chronic pulpitis and status post pulpotomy). The standard treatment is complete Root Canal Treatment (RCT). Treatment must be performed under rubber dam isolation, strictly following the steps of canal preparation, disinfection, and obturation, and must be followed by prompt placement of a full crown to protect the tooth. Postoperatively, the patient must be thoroughly informed about potential postoperative reactions, medication, oral care, dietary restrictions, and the critical importance of adhering to follow-up appointments and completing the final crown restoration.  With standardized RCT and timely crown restoration, the prognosis for this tooth is good, and it can be expected to remain functional long-term. | Professional Diagnosis  As an endodontist, I have reviewed the provided American Dental Association (ADA) evidence-based clinical practice guideline on nonrestorative treatments for carious lesions (published 2018, no updates noted as of August 21, 2025). The guideline focuses on arresting or reversing noncavitated and cavitated carious lesions using interventions like silver diamine fluoride (SDF), fluoride varnishes, gels, sealants, and high-concentration fluoride toothpaste, primarily for surface-level caries management without restorative procedures. However, this case involves pulpal and periapical pathology in tooth 47 (mandibular right second molar), likely stemming from caries or trauma leading to pulp involvement, rather than active surface caries alone. The guideline is not directly applicable for managing necrotic or inflamed pulp tissue, as these require endodontic intervention to address intracanal infection. Nonrestorative approaches (e.g., SDF for advanced cavitated coronal lesions or 5,000 ppm fluoride for root lesions) cannot substitute for root canal therapy (RCT) in cases of pulpal necrosis or apical periodontitis. That said, I reference the guideline for preventive recommendations to minimize future caries risk, such as prioritizing high-fluoride toothpaste for any potential root exposure.  Based on the history, clinical examination, and radiographic findings:  - Tooth 47: Previously initiated endodontic therapy (pulp chamber opened, partial pulpectomy performed) with symptomatic apical periodontitis. This is supported by:  - History of chronic pain (>6 months), post-filling thermal sensitivity (suggesting irreversible pulpitis initially), and recent pulpectomy.  - Negative temperature test (cold/hot no response), but positive electric pulp test (EPT) – this discrepancy may indicate partial pulp vitality in a multirooted tooth (e.g., vital tissue in one canal), though EPT can yield false positives in necrotic cases.  - Probe pain (+), percussion pain (+), mild looseness (degree I), and gingival congestion, indicating inflammation and possible infection.  - Radiographic widening of the periapical membrane (radiolucency), consistent with periapical inflammation/infection.  - No systemic diseases or allergies reported, reducing complications risk.  - Differential Diagnosis: Partial pulp necrosis (explaining EPT +), chronic apical abscess (if drainage present, though not noted), or combined endodontic-periodontal lesion (given gingival congestion). Rule out cracked tooth or reinfection from inadequate previous treatment.  The initial filling likely failed to arrest underlying caries progression, leading to pulp involvement. No other teeth mentioned, assuming isolated issue.  Treatment Plan  The goal is to eliminate infection, resolve symptoms, and preserve the tooth. Given the opened pulp and periapical involvement, complete nonsurgical RCT is indicated (success rate ~85-95% for multirooted teeth). Nonrestorative options from the ADA guideline (e.g., 38% SDF biannually for cavitated coronal lesions, moderate-certainty, conditional for permanent teeth) are unsuitable as primary treatment here, as they do not address pulpal infection. However, if root surface caries emerges post-treatment (e.g., from recession), prioritize 5,000 ppm fluoride toothpaste (daily) over varnish or SDF (guideline: low-certainty, conditional for root lesions).  1. Immediate Management (Today):  - Confirm diagnosis with additional tests (e.g., repeat EPT, CBCT if crack suspected).  - Local anesthesia and complete pulpectomy if partial vitality remains; medicate canals.  - Analgesics for pain; antibiotics only if systemic signs (e.g., swelling spreads) – not routine.  2. Definitive Treatment:  - Tooth 47: Nonsurgical RCT completion. Strong recommendation based on symptoms and radiography; multi-visit if exudate present.  - Preventive Measures (Referencing ADA Guideline):  - Post-RCT, recommend 5,000 ppm fluoride (1.1% NaF) toothpaste/gel daily to prevent root caries (prioritized over 5% NaF varnish every 3-6 months; low-certainty, conditional).  - If noncavitated occlusal caries noted on other teeth, prioritize sealants + 5% NaF varnish (every 3-6 months) over varnish alone (moderate-certainty, strong for permanent teeth).  - Avoid 10% CPP-ACP as a fluoride substitute (low-certainty, conditional against use).  - Oral hygiene education: Reduce sugars, brush with fluoridated toothpaste.  3. Alternatives:  - If patient uncooperative or prefers conservative: Monitor if asymptomatic, but not advised given pain.  - Extraction if RCT fails or declined.  - Referral if periodontal component dominant.  4. Prognosis: Good post-RCT (80-90% success for molars); monitor periapical healing.  5. Follow-up: 1 week for obturation, 6 months radiographic recall.  Procedure for Root Canal Therapy (Tooth 47)  Multirooted tooth (typically 3 canals); 1-2 visits under asepsis with rubber dam.  1. Preoperative:  - Informed consent: Risks (pain, failure ~10-15%, instrument separation), benefits (symptom relief), alternatives (extraction), adverse effects (e.g., temporary discoloration if SDF used preventively).  - Anesthesia: Inferior alveolar block + long buccal (2% lidocaine 1:100,000 epinephrine).  - Rubber dam isolation.  2. Access and Pulpectomy:  - Enlarge existing access to locate all canals (mesial, distal; possible MB/ML).  - Extirpate any remaining pulp; irrigate with 3-5% NaOCl.  - Working length: Apex locator + radiograph.  3. Instrumentation and Disinfection:  - Shape with rotary NiTi files (e.g., ProTaper Next) to ISO 30-40 apically.  - Irrigate: NaOCl + 17% EDTA; activate with ultrasonics.  - If multi-visit: Calcium hydroxide medicament; temporary seal (e.g., Cavit).  4. Obturation:  - Dry canals; obturate with gutta-percha and sealer (e.g., bioceramic) via warm vertical compaction.  - Seal access with composite.  5. Postoperative Radiograph: Verify fill.  6. Restoration: Core buildup + crown within 1 month to prevent fracture.  Duration: 60-120 minutes per visit.  Postoperative Instructions  - Pain Management: Mild discomfort 2-5 days normal; ibuprofen 400-600 mg every 6 hours (max 2,400 mg/day). Severe pain/swelling: Contact immediately (flare-up risk ~8%).  - Swelling: Ice pack 15 min on/off first 24 hours.  - Diet: Soft foods 48 hours; avoid treated side until crowned.  - Oral Hygiene: Brush/floss gently; warm saltwater rinses 2-3x/day from day 2.  - Medications: Complete any prescribed (e.g., amoxicillin if indicated). No routine antibiotics.  - Warnings: Avoid hard/chewy foods. If filling loosens, return ASAP.  - Preventive Advice (Per ADA Guideline): Use 5,000 ppm fluoride toothpaste daily for root caries prevention. Regular check-ups; if new lesions, consider sealants/varnish per surface-specific recommendations.  - Follow-up: Return in 1 week if needed; 6 months for healing assessment (periapical resolution expected 6-12 months).  Contact if issues arise. This aligns with endodontic standards and guideline prevention.  _Disclaimer: Grok is not a doctor; please consult one. Don't share information that can identify you._ | ****Diagnosis**** **Tooth 11 (right maxillary central incisor) and 12 (right maxillary lateral incisor):**  History of deep caries and defective restorations.  Pulp testing: No response to cold, hot, or EPT → **non-vital pulp**.  Clinical: Percussion pain (+), occlusal pain (+), mild gingival congestion, no sinus tract.  Radiograph: Periapical radiolucency at apices of 11 and 12.  **Final Diagnosis:**  **Chronic apical periodontitis with acute exacerbation, teeth 11 and 12 (secondary to pulp necrosis from caries).** ****Treatment Plan**** **Endodontic therapy**  Root canal treatment (RCT) for both 11 and 12.  If prognosis is poor (severe periapical destruction, vertical root fracture), surgical endodontics (apicoectomy) or extraction + prosthetic replacement may be considered.  **Caries & Restoration**  Remove defective filling and residual caries.  After RCT, restore with fiber post + composite/core buildup if necessary.  Final full-coverage crown recommended for long-term stability.  Preventive measures (from guideline)  High-fluoride toothpaste (5,000 ppm NaF) or varnish application to prevent recurrence.  Dietary counseling to reduce sugar intake.  Regular recall and radiographic follow-up.  **Procedure (RCT for 11 and 12)**  Local anesthesia + rubber dam isolation.  Remove defective restorations and carious dentin, refine access cavities.  Working length determination (apex locator + radiograph).  Cleaning and shaping with rotary NiTi system, irrigation with NaOCl (2.5–5.25%) and EDTA.  Place intracanal medicament (Ca(OH)₂) if periapical inflammation is significant; temporary seal.  At subsequent visit, obturation with gutta-percha + sealer (warm vertical compaction technique preferred).  Definitive restoration with post-core if needed, followed by crowns on 11 and 12. ****Postoperative Instructions**** Expect mild discomfort for 2–3 days; take NSAIDs as needed.  Avoid biting hard foods on anterior teeth until permanent crowns are placed.  Maintain strict oral hygiene, fluoride toothpaste/varnish use.  Recall at 3–6 months: clinical and radiographic evaluation of periapical healing.  Annual reviews thereafter.  ✅ This integrates **endodontic standards** with **preventive strategies** (fluoride and caries control) from the uploaded guideline, ensuring both curative and preventive care.  Would you like me to also create a **combined treatment timeline (week 0 → week 2 → month 3 → year 1)** so you can use it as a structured patient management schedule? |
| Case: Chronic Apical Periodontitis  Chief Complaint: Discomfort when biting on the right upper front teeth for 1 week.  Present Illness: The patient reported a history of pain in response to cold and hot stimuli in the right upper front teeth two years ago, which was treated with a "filling" restoration at an external dental clinic without subsequent root canal therapy. One week ago, the same teeth experienced recurrent swelling and pain. The symptoms were alleviated after self-administered "anti-inflammatory and pain relief medication." The patient now presents to our hospital requesting treatment.  Allergies: None  Other: The patient denies a history of cardiovascular diseases (e.g., hypertension, coronary heart disease), diabetes, or other systemic conditions; denies any drug allergies; and denies a history of infectious diseases.  Oral Examination: Teeth 11 and 12 exhibit tooth-colored filling materials on the lingual surfaces with defective margins. Surrounding the fillings, extensive soft, light-colored carious material is visible, extending into deep dentin. Tenderness on probing (-). Pulp vitality tests: No response to cold test; no response to heat test; no response to electric pulp test (control tooth responded normally). Percussion: discomfort on percussion; pain on biting (+). Physiological mobility. No sinus tract observed on the buccal alveolar mucosa. Mild congestion and tenderness on palpation. No periodontal pockets were detected.  Auxiliary Examination: Radiographic examination (X-ray) performed in our hospital on July 12, 2025, revealed: Tooth 11 shows widening of the periodontal ligament space and a periapical radiolucent area. Tooth 12 shows widening of the periodontal ligament space and a large periapical radiolucent lesion. | Treatment Plan:  Option 1: Root Canal Therapy (RCT) + Prosthodontic Crown Restoration  Option 2: Observation  After detailed communication with the patient, explaining the treatment process, efficacy, cost, prognosis, and other relevant aspects of each option, the patient selected Option 1. The difficulty level of the root canal treatment was assessed as Grade III. The patient was informed about potential complications during RCT, including instrument separation (file breakage), lateral perforation, furcal perforation, inaccessible canals, and overall treatment failure. The possibility of requiring future apical surgery for tooth 12 was also discussed. The patient carefully read the written "Informed Consent" form and provided signed consent for treatment. The medical history documentation is consistent with the information provided by the patient.  Procedure: The steps of the upcoming procedure and precautions were explained to the patient in detail. The teeth to be treated were verified by two clinicians using a two-way check (call-back method). A disposable examination kit, disposable triple-function syringe tip, and disposable saliva ejector were used. The oral cavity was cleaned. Under local anesthesia (Articaine with Epinephrine), access preparation was initiated under dental microscope guidance using a high-speed handpiece. The entire pulp chamber roof was removed. Hemostasis was achieved. Ultrasonic instruments were used to assist in completely removing calcified tissues from the pulp chamber and canal orifices. The pulp chamber floor was confirmed to be intact. Canal orifices for teeth 11 and 12 were located using a DG16 explorer (2 canals identified). Pulp extirpation was performed. Canals were negotiated with a 10 C-file. Working length was determined using an electronic apex locator: 21 = 22 = 19mm. Canals were cleaned and shaped using EDTA and rotary nickel-titanium instruments (WaveOne Gold) to size 25, .06 taper. A double-sided open-ended irrigation needle was used for alternating irrigation with 1% sodium hypochlorite and normal saline. Final ultrasonic irrigation (activation) was performed. Canals were dried. Calcium hydroxide paste was placed as an intracanal medicament. The access cavities were temporarily sealed with glass ionomer. High-speed Handpiece ID: TN12  Postoperative Instructions: Follow-up appointment in 1 week. Consider systemic anti-inflammatory medication if indicated. Return if any discomfort occurs (or "PRN"). Avoid chewing on the treated side. | Case Analysis:  Chief Complaint: Discomfort when biting on the right upper front teeth (teeth 11, 12) for one week – suggests inflammation of the periapical tissues.  Present Illness:  History of pain upon cold and hot stimulation (symptoms typical of irreversible pulpitis) two years ago, which was treated only with a restoration (incomplete treatment, failing to address the underlying pulp issue).  Recurrent swelling and pain occurred one week ago, alleviated by self-administered anti-inflammatory and pain medication (suggests a history of acute apical periodontitis).  The patient now presents for treatment.  Examination:  Clinical Examination:  The margins of the lingual restorations on teeth 11 and 12 are defective, surrounded by extensive soft carious material extending into deep dentin – indicates secondary caries and failed previous restorations, providing a persistent pathway for bacterial invasion.  Tenderness on probing (-) – suggests caries may not have reached vital pulp, or the pulp is already necrotic.  Pulp vitality tests (cold, heat, electric): No response on teeth 11 and 12; control teeth responded normally – provides clear and consistent evidence of pulp necrosis in teeth 11 and 12.  Sensitivity to percussion and pain on biting (+) – A key positive sign! Clearly indicates inflammation of the periapical tissues (apical periodontitis).  Mild congestion and tenderness on palpation of the buccal mucosa – indicates the periapical inflammation has affected the mucosal tissues.  Physiological mobility; no sinus tract detected; no periodontal pockets probed – suggests the current lesion is primarily confined to the periapical area, not of periodontal origin.  Auxiliary Examination (X-ray):  Tooth 11: Widening of the periodontal ligament space and a radiolucent area at the apex – clear radiographic evidence of chronic apical periodontitis.  Tooth 12: Widening of the periodontal ligament space and a large radiolucent area at the apex – clear radiographic evidence of extensive chronic apical periodontitis (possibly with more significant bone destruction).  Comprehensive Diagnoses:  11 Pulp Necrosis  11 Chronic Apical Periodontitis  12 Pulp Necrosis  12 Chronic Apical Periodontitis (Extensive)  11, 12 Secondary Caries  11, 12 Defective Restoration (Defective restoration margins)  Basis for Diagnosis:  History of irreversible pulpitis (pain to cold/heat) 2 years ago + history of incomplete treatment (restoration only).  Recent history of acute apical periodontitis (swelling and pain).  No response to all pulp vitality tests (gold standard).  Sensitivity to percussion and pain on biting (+).  Mild mucosal congestion and tenderness on palpation.  X-ray shows widened PDL space and periapical radiolucencies around teeth 11 and 12 (indicating periapical bone destruction).  Treatment Plan: Core Treatment: Teeth 11, 12 Root Canal Treatment (RCT)  Necessity: This is the only effective method for treating pulp necrosis and chronic apical periodontitis. The goal is to thoroughly remove the source of infection within the root canal system (necrotic pulp, bacteria, their byproducts, infected dentin), hermetically obturate the canals to prevent re-infection, and promote healing of the periapical lesions. Anterior tooth root canals are generally straighter and larger, making the procedure relatively simpler than for posterior teeth.  Treatment Steps (Procedure):  Step 1: Preoperative Preparation  Confirm history, examination findings, diagnoses, and review X-rays (assess root canal morphology, extent of periapical lesion, estimate working length).  Sign the Root Canal Treatment Informed Consent form (detail risks, prognosis, cost, need for subsequent restoration, etc.).  Rubber dam isolation – Absolutely mandatory! Provides a sterile environment, prevents salivary contamination, prevents aspiration or ingestion of instruments, protects the patient, and ensures a clear field of view.  Step 2: Access Preparation and Caries Removal  Completely remove the defective lingual restorations and all surrounding soft carious material.  Establish proper access cavity based on anterior tooth anatomy (lingual approach) to create straight-line access to the canal orifices.  Unroof the pulp chamber completely to expose the canal orifices.  Step 3: Working Length Determination  Use an Electronic Apex Locator (EAL) combined with a working length X-ray (initial file/diagnostic file radiograph) to precisely determine the working length (from an incisal reference point to the apical constriction). Anterior teeth usually have a single root canal (occasional variations exist).  Step 4: Root Canal Preparation (Cleaning & Shaping)  Perform root canal cleaning and shaping using manual K-files, H-files, and/or rotary nickel-titanium instruments (e.g., ProTaper Gold, Hyflex CM).  Core Goal: Thoroughly remove infected material from the canal walls. The larger canals of anterior teeth facilitate instrument manipulation and irrigation.  Copious, effective irrigation: Alternate use of Sodium Hypochlorite (NaOCl, common concentration 2.5%-5.25%), EDTA, and normal saline. NaOCl dissolves organic matter and disinfects; EDTA removes the smear layer. The larger, straighter canals of anterior teeth allow irrigants to reach the apex more easily, enhancing efficacy. Ultrasonic activation of irrigants is highly recommended to improve cleaning, especially in the apical third and lateral canals.  Strictly control working length during preparation.  Step 5: Intracanal Medicament and Temporary Restoration (Usually required, especially for tooth 12 with extensive lesion)  After drying the prepared canals, place an intracanal medicament. Calcium Hydroxide (Ca(OH)2) paste is the first choice.  Purpose of medicament: Powerful disinfection, neutralization of inflammatory mediators, induction of hard tissue formation, and reduction of the risk of postoperative flare-ups (especially important for tooth 12's larger lesion).  Seal the access cavity tightly with a reliable temporary restoration material (e.g., Cavit, IRM).  Schedule a follow-up appointment in 1-2 weeks. If intraoperative infection control is excellent, the canals are dry and clean, with minimal exudate, a single-visit RCT for anterior teeth can sometimes be attempted (requires cautious assessment, slightly higher risk). However, given the extensive lesion in tooth 12 and the history of acute symptoms, placement of medicament is recommended.  Step 6: Root Canal Obturation  At the follow-up, proceed if the patient is asymptomatic and examination shows no positive signs (no or minimal percussion sensitivity, no swelling), and the canals are clean, dry, and odorless.  Remove the temporary restoration and Ca(OH)2, perform final irrigation, and dry the canals thoroughly.  Select a master gutta-percha cone, perform a cone fit check, and take a master cone X-ray to confirm appropriate length and taper.  Obturate the root canal system using the warm vertical compaction technique (preferred) or the cold lateral compaction technique along with a root canal sealer (e.g., AH Plus). Warm gutta-percha adapts well to the larger anterior canals, providing superior sealing.  Take a postoperative X-ray to assess the quality of obturation (adequate length, uniform density, appropriate taper).  Seal the access cavity tightly (recommended: glass ionomer or composite resin base + sealed with composite resin).  Step 7: Final Restoration (Essential!)  Emphasis: Anterior teeth are critical for aesthetics and incisal function. Teeth after RCT may discolor (darken) over time and become more brittle.  Preferred Restorative Options:  All-Ceramic Crown: Optimal aesthetics! Excellent biocompatibility, natural color and translucency, and great long-term stability. The gold standard for restoring endodontically treated anterior teeth. Recommended: lithium disilicate (e.g., E.max) or zirconia crowns.  Porcelain Veneer: Only applicable if the labial tooth structure is very well preserved (caries and access cavity limited to the lingual side) and occlusal forces are not excessive. Requires strict case selection. Usually not the first choice for teeth 11 and 12 with large lingual defects.  Interim Restoration: Before permanent restoration, a strong, aesthetic composite resin restoration can be placed on the lingual surface to restore morphology and basic function, and protect the tooth. However, the patient must be informed that this is temporary and must be followed by permanent crown/veneer restoration ASAP.  Postoperative Instructions:  Managing Postoperative Symptoms:  Mild throbbing, biting discomfort, or slight gum tenderness may occur for 2-3 days post-treatment; this is a normal response.  Avoid biting hard foods (e.g., apples, nuts) with the treated tooth.  Pain usually subsides spontaneously or with over-the-counter pain medication (e.g., ibuprofen, acetaminophen).  Contact the clinic or seek immediate care if severe pain, significant swelling, throbbing pain, gum boil (pus discharge), or fever occurs! This could signal an acute flare-up.  Medication Guidance:  Prophylactic antibiotics are usually not required.  Take OTC pain relievers as needed and according to instructions for significant pain.  Oral Hygiene:  Maintain good oral hygiene; brush and rinse gently on the day of treatment.  Avoid aggressive brushing around the treated area (especially the lingual temporary/final restoration) temporarily, but keep it clean.  Dietary Instructions:  Wait until the temporary restoration has fully set (usually 1-2 hours) before eating.  Avoid very hot or cold foods and drinks on the day of treatment.  Until the final permanent restoration (all-ceramic crown/veneer) is placed:  STRICTLY AVOID using the front teeth to bite into hard objects (e.g., bones, nuts, ice, hard candy, nutshells, crab shells)! This is the most crucial instruction to prevent tooth fracture!  Avoid sticky foods (e.g., rice cakes, chewy candy, gum) to prevent dislodging the temporary or final restoration.  Cut food into small pieces and chew with the back teeth.  Follow-up Schedule:  Attend all scheduled follow-up appointments promptly (for obturation or subsequent treatment).  After RCT completion, proceed with the permanent restoration (all-ceramic crown/veneer where indicated) as soon as possible (typically within 2-4 weeks).  After permanent restoration placement, recall examinations at 6 months and 1 year are recommended, including X-rays to assess periapical healing. Thereafter, regular dental check-ups and maintenance are advised.  Emphasis on Aesthetics and Function:  Explain to the patient that the tooth may darken over time after RCT, and an all-ceramic crown/veneer is the best option to restore aesthetics and function.  Reiterate the urgency of permanent restoration: Delaying restoration not only increases fracture risk but may also lead to microleakage, root canal re-infection, and treatment failure. A good coronal seal is a critical factor for the long-term success of RCT.  Summary:  The patient's teeth 11 and 12 are diagnosed with pulp necrosis, chronic apical periodontitis (extensive for tooth 12), secondary caries, and defective restorations. The standard and necessary treatment is comprehensive Root Canal Treatment (RCT). Treatment must be performed under strict rubber dam isolation, emphasizing thorough canal cleaning, shaping, disinfection (especially recommending Ca(OH)2 placement for tooth 12), and hermetic three-dimensional obturation. Subsequent permanent aesthetic restoration (preferably all-ceramic crowns) is mandatory to restore function, prevent fracture, and achieve optimal aesthetics. Postoperative instructions must strongly emphasize avoiding biting hard objects with the front teeth to prevent fracture, recognizing abnormal symptoms, attending follow-up appointments, and the importance of timely permanent restoration. Through standardized RCT and high-quality aesthetic restoration, teeth 11 and 12 can be expected to eliminate infection, heal periapical lesions, and function stably while meeting aesthetic needs in the long term. | Professional Diagnosis  Based on the patient's history, clinical examination, and radiographic findings, and referring to the ADA's evidence-based guidelines on nonrestorative treatments for carious lesions (which emphasize arresting or reversing caries through conservative, non-invasive approaches where feasible, prioritizing effectiveness, safety, and patient preferences):  - Teeth Involved: Maxillary right central incisor (tooth 11) and lateral incisor (tooth 12).  - Pulpal Diagnosis:  - Tooth 11: Pulp necrosis (no response to cold/hot or electric pulp vitality testing, compared to control teeth).  - Tooth 12: Pulp necrosis (same as above).  - Periapical Diagnosis:  - Tooth 11: Chronic apical periodontitis (widened periodontal ligament space and low-density periapical radiolucency on radiograph; percussion discomfort but no acute symptoms like sinus tract).  - Tooth 12: Chronic apical periodontitis (widened periodontal ligament space and larger low-density periapical radiolucency; percussion discomfort).  - Caries Diagnosis:  - Both teeth: Advanced cavitated coronal carious lesions (extensive soft, pale carious tissue reaching deep dentin; poorly sealed margins on existing tooth-colored fillings, indicating secondary caries). Lesions are likely ICDAS 5-6 based on clinical description (cavitated with dentin involvement) and radiographic evidence of progression.  - No evidence of root surface caries or noncavitated lesions described.  - Other Findings: Mild mucosal congestion and tenderness suggest localized inflammation, but no deep periodontal pockets or mobility beyond physiological limits. Occlusal pain may relate to masticatory discomfort from the lesions or periapical involvement.  - Etiology: Recurrent caries under previous restorations, leading to pulpal necrosis and apical periodontitis. The patient's self-reported history of incomplete treatment two years ago aligns with this progression.  - Rationale from Guidelines: The guidelines recommend nonrestorative approaches for arresting cavitated coronal lesions (e.g., prioritizing 38% silver diamine fluoride [SDF] biannually for advanced cavitated lesions on permanent teeth, conditional recommendation, low certainty). However, these are adjunctive for caries arrest and do not address pulpal necrosis or apical periodontitis. Given the non-vital pulp and periapical pathology, nonrestorative treatments alone are insufficient—endodontic intervention is required to eliminate infection and prevent further progression. Aesthetic concerns (front teeth) and patient preferences (discomfort in mastication) must be considered, as SDF causes black staining.  Differential diagnosis considered: Acute apical abscess (ruled out due to no swelling/sinus tract and relief with self-medication) or reversible pulpitis (ruled out by negative vitality tests).  Treatment Plan  As an endodontist, the primary goal is to address the pulpal and periapical pathology while integrating guideline-recommended nonrestorative strategies for caries arrest where applicable. Treatment prioritizes evidence-based, minimally invasive approaches, informed consent (explaining options, risks, and alternatives, including staining from SDF), and multidisciplinary referral if needed (e.g., restorative dentist for final restoration).  1. Immediate/Short-Term Plan (Today or Next Visit):  - Confirm diagnosis with repeat vitality testing if needed.  - Obtain informed consent: Discuss nonrestorative options (e.g., SDF for caries arrest), but explain why root canal therapy (RCT) is necessary due to necrosis/apical involvement. Alternatives: Extraction (if patient declines RCT) or monitoring (not recommended due to risk of flare-up). Risks: Infection progression, pain, staining (if SDF used), or restoration failure.  - Pain management: Prescribe ibuprofen 400-600 mg every 6-8 hours as needed (no antibiotics unless systemic signs).  - Refer to guidelines: For cavitated coronal lesions on permanent teeth, suggest 38% SDF (biannual) over 5% NaF varnish (conditional, low certainty) as an adjunct to arrest caries during/after RCT.  2. Definitive Treatment:  - Root Canal Therapy (RCT) for Teeth 11 and 12: Standard non-surgical RCT to eliminate infection, preserve teeth, and resolve apical periodontitis. Perform in 1-2 visits per tooth, depending on drainage and patient comfort.  - Sequence: Treat tooth 12 first (larger apical lesion, potentially more symptomatic).  - Integrate guidelines: During access and caries excavation, apply 38% SDF to arrest residual deep carious dentin (if not fully excavatable without pulp exposure risk), aligning with guideline recommendations for cavitated lesions (conditional for permanent teeth, low certainty). Avoid if aesthetics are a high priority (patient consent required for staining).  - Restorative Plan: Interim restoration post-RCT (e.g., glass ionomer or composite). Refer to general dentist for permanent restoration (e.g., crown if extensive loss). If nonrestorative arrest is prioritized (e.g., patient refuses RCT), use 38% SDF biannually + 5% NaF varnish (every 3-6 months) to attempt arrest, but monitor closely (not ideal due to pulpal involvement).  - Follow-Up: Radiographic review at 6-12 months to assess healing (periapical index). Reapply SDF/NaF if caries persists (per guidelines).  3. Alternative Options (if RCT Declined):  - Nonrestorative only: Biannual 38% SDF application to arrest cavitated lesions (guideline priority for permanent coronal surfaces, conditional, low certainty). Combine with 5% NaF varnish (every 3-6 months) for adjunctive remineralization. Monitor every 3-6 months, but warn of progression risk to abscess.  - Extraction and prosthetics (implant/bridge) if symptoms worsen.  4. Rationale for Integration of Guidelines:  - Guidelines emphasize nonrestorative arrest for cavitated lesions (e.g., SDF over NaF varnish), which can be used adjunctively during RCT to minimize tissue loss.  - Patient factors: Anterior teeth (aesthetics may contraindicate SDF due to staining); no contraindications (e.g., no allergies, cooperative patient).  - Evidence Level: Moderate-high for SDF in cavitated lesions; prioritize based on feasibility and safety.  Procedure for Root Canal Therapy (RCT)  Perform under local anesthesia (e.g., 2% lidocaine with 1:100,000 epinephrine) and rubber dam isolation for asepsis.  1. Access and Caries Excavation (10-15 minutes):  - Remove existing filling and excavate soft caries (use caries detector dye if needed).  - Apply 38% SDF to deep dentin (30 seconds, air-dry; per guidelines for arrest). Rinse and dry. Avoid on enamel for aesthetics.  2. Pulpectomy and Instrumentation (20-30 minutes per tooth):  - Access pulp chamber; extirpate necrotic tissue.  - Determine working length (electronic apex locator + radiograph).  - Biomechanical preparation: Rotary NiTi files (e.g., ProTaper) to ISO size 35-40, with copious irrigation (2.5% NaOCl + 17% EDTA).  3. Medication and Temporization (5-10 minutes):  - If multi-visit: Place Ca(OH)2 intracanal medicament.  - Seal access with temporary filling (e.g., Cavit).  4. Obturation (Second Visit, 20-30 minutes):  - Irrigate, dry canals.  - Obturate with gutta-percha (warm vertical compaction) and sealer (e.g., AH Plus).  - Post-obturation radiograph.  - Place interim restoration.  Total time per tooth: 45-60 minutes per visit. Use magnification (loupes/microscope) for precision.  Postoperative Instructions  - Pain Management: Expect mild discomfort for 2-3 days; take ibuprofen 400-600 mg every 6-8 hours (max 2400 mg/day). Contact if severe pain/swelling.  - Oral Hygiene: Brush gently with soft toothbrush and fluoride toothpaste (e.g., 5000 ppm if high caries risk, per guidelines for root surfaces, though not applicable here). Avoid flossing treated area for 24 hours.  - Diet: Soft foods for 24 hours; avoid chewing on treated teeth until permanent restoration.  - Warnings: Temporary filling may wear; return if it dislodges. If SDF used: Black staining is permanent but indicates arrest (per guidelines).  - Follow-Up: Return in 1-2 weeks for second visit (if multi-visit RCT). Recall at 3, 6, 12 months for clinical/radiographic evaluation. Reapply SDF/NaF varnish if residual caries noted (biannual/every 3-6 months per guidelines).  - Emergency: Call if fever, swelling, or severe pain (possible flare-up).  - Prevention: Per upcoming ADA prevention guidelines, reduce sugar intake, brush with fluoridated toothpaste twice daily. If high risk, consider 5000 ppm fluoride toothpaste (guideline suggestion for root lesions, low certainty).  This plan aligns with evidence-based practice, prioritizing nonrestorative caries arrest where possible while addressing endodontic needs. Refer to restorative specialist post-RCT. If questions, contact for clarification.  _Disclaimer: Grok is not a doctor; please consult one. Don't share information that can identify you._ | Based on the case you provided and the uploaded guideline , here is a structured professional assessment: ****Diagnosis**** **Tooth 11 (right maxillary central incisor) and 12 (right maxillary lateral incisor):**  History of deep caries and defective restorations.  Pulp testing: No response to cold, hot, or EPT → **non-vital pulp**.  Clinical: Percussion pain (+), occlusal pain (+), mild gingival congestion, no sinus tract.  Radiograph: Periapical radiolucency at apices of 11 and 12.  **Final Diagnosis:**  **Chronic apical periodontitis with acute exacerbation, teeth 11 and 12 (secondary to pulp necrosis from caries).** ****Treatment Plan**** **Endodontic therapy**  Root canal treatment (RCT) for both 11 and 12.  If prognosis is poor (severe periapical destruction, vertical root fracture), surgical endodontics (apicoectomy) or extraction + prosthetic replacement may be considered.  **Caries & Restoration**  Remove defective filling and residual caries.  After RCT, restore with fiber post + composite/core buildup if necessary.  Final full-coverage crown recommended for long-term stability.  Preventive measures (from guideline)  High-fluoride toothpaste (5,000 ppm NaF) or varnish application to prevent recurrence.  Dietary counseling to reduce sugar intake.  Regular recall and radiographic follow-up. ****Procedure (RCT for 11 and 12)**** Local anesthesia + rubber dam isolation  Remove defective restorations and carious dentin, refine access cavities.  Working length determination (apex locator + radiograph).  Cleaning and shaping with rotary NiTi system, irrigation with NaOCl (2.5–5.25%) and EDTA.  Place intracanal medicament (Ca(OH)₂) if periapical inflammation is significant; temporary seal.  At subsequent visit, obturation with gutta-percha + sealer (warm vertical compaction technique preferred).  Definitive restoration with post-core if needed, followed by crowns on 11 and 12. ****Postoperative Instructions**** Expect mild discomfort for 2–3 days; take NSAIDs as needed.  Avoid biting hard foods on anterior teeth until permanent crowns are placed.  Maintain strict oral hygiene, fluoride toothpaste/varnish use.  Recall at 3–6 months: clinical and radiographic evaluation of periapical healing.  Annual reviews thereafter.  ✅ This integrates **endodontic standards** with **preventive strategies** (fluoride and caries control) from the uploaded guideline, ensuring both curative and preventive care.  Would you like me to also create a **combined treatment timeline (week 0 → week 2 → month 3 → year 1)** so you can use it as a structured patient management schedule? |
